# Supplementary material for: Nuclear receptor Ftz-f1 promotes follicle maturation and ovulation partly via bHLH/PAS transcription factor Sim
Source: eLife. 2020 Apr 27;9:e54568. doi: 10.7554/eLife.54568 (PMC7239656; doi:10.7554/eLife.54568)
Supplement: Supplementary file 1. [file elife-54568-supp1.xlsx]

## Sheet: downregulated genes
Downregulated-gene list
filtered according to baseMean>10, padj<0.01, and log2FoldChange<-1.
Gene_ID	Gene_name	baseMean	log2FoldChange	lfcSE	stat	pvalue	padj	ftzf1_rep1	ftzf1_rep2	control_rep1	control_rep2	control_rep3
FBgn0037975	CG3397	162.104	-10.4378	1.45984	7.14994	8.68142e-13	3.12367e-11	0	0	237.68	247.274	325.568
FBgn0034788	CG13532	124.503	-8.62196	1.42524	6.04947	1.45325e-09	3.16064e-08	0.906843	0	145.155	193.975	282.478
FBgn0063499	GstE10	36.4683	-8.29717	1.5478	5.36062	8.29354e-08	1.28049e-06	0	0	73.0017	83.0072	26.3327
FBgn0028986	Spn38F	20.5825	-7.46086	1.52625	4.88837	1.01676e-06	1.22713e-05	0	0	31.4077	33.2029	38.3021
FBgn0085792	CR41509	19.0496	-7.34683	1.54065	4.76867	1.8545e-06	2.12166e-05	0	0	24.6169	32.3291	38.3021
FBgn0051676	CG31676	35.4043	-6.8014	1.45613	4.67086	2.99937e-06	3.28245e-05	0.906843	0	44.1406	54.1731	77.8012
FBgn0013813	Dhc98D	14.3387	-5.50961	1.54243	3.57203	0.000354221	0.0021451	0.906843	0	31.4077	26.2128	13.1664
FBgn0264000	GluRIB	36.2316	-5.26783	0.920348	5.72374	1.04205e-08	1.95818e-07	2.72053	0	64.5131	57.6681	56.2562
FBgn0085786	CR41501	35.1916	-5.22198	0.923415	5.65507	1.55779e-08	2.81119e-07	2.72053	0	58.5711	52.4256	62.2409
FBgn0042701	CR12628	73.4439	-4.86214	0.581417	8.36257	6.13662e-17	3.67725e-15	6.3479	1.22984	127.329	116.21	116.103
FBgn0030576	CG15890	542.037	-4.45729	0.690446	6.45568	1.07737e-10	2.84937e-09	64.3858	14.7581	1013.54	759.297	858.207
FBgn0005775	Con	50.1947	-4.3052	0.610537	7.05149	1.77007e-12	6.11602e-11	6.3479	1.22984	84.8857	79.5121	78.9981
FBgn0033594	CG13226	12.188	-4.28126	1.22778	3.48699	0.000488485	0.00283977	1.81369	0	22.9191	21.844	14.3633
FBgn0019661	lncRNA:roX1	21.1296	-4.01386	0.863969	4.64584	3.38693e-06	3.65524e-05	1.81369	2.45968	36.5009	34.9504	29.9235
FBgn0031111	Obp19c	10868.7	-4.01188	0.434828	9.22637	2.79968e-20	2.22134e-18	1492.66	662.885	19883.6	15995	16309.5
FBgn0037410	Osi2	62.5293	-3.93229	0.699461	5.62189	1.88878e-08	3.30306e-07	9.06843	3.68952	181.655	75.1433	43.0899
FBgn0034439	CG10062	64.3854	-3.82321	0.485477	7.87516	3.40297e-15	1.65682e-13	9.06843	4.91937	91.6766	101.356	114.906
FBgn0033483	egr	269.237	-3.75317	0.237886	15.7772	4.46841e-56	2.94537e-53	34.46	28.2864	450.743	395.813	436.884
FBgn0032869	CG17470	167.348	-3.73436	0.292951	12.7474	3.22314e-37	1.06227e-34	17.23	23.367	274.181	258.633	263.327
FBgn0050485	CG30485	26.4762	-3.71355	0.731861	5.07412	3.89299e-07	5.14007e-06	1.81369	4.91937	37.3497	42.8142	45.4838
FBgn0035325	CG13806	19.9201	-3.615	0.849596	4.25496	2.09082e-05	0.000181338	3.62737	1.22984	26.3146	25.339	43.0899
FBgn0036939	CG7365	248.473	-3.48145	0.767549	4.53581	5.73832e-06	5.86075e-05	57.1311	12.2984	528.838	300.573	343.522
FBgn0037534	ELOVL	2609.02	-3.22781	0.394345	8.18524	2.71767e-16	1.4833e-14	566.777	298.851	4982.79	3535.23	3661.44
FBgn0037415	Osi8	21.2574	-3.22175	0.767954	4.19524	2.72588e-05	0.00022932	5.44106	1.22984	35.652	24.4653	39.4991
FBgn0032614	CG13284	165.263	-3.06086	0.37187	8.231	1.85661e-16	1.03982e-14	42.6216	17.2178	340.392	197.47	228.616
FBgn0038395	CG10407	15242.3	-2.95114	0.343494	8.59154	8.5814e-18	5.36744e-16	3797.86	2249.38	28150.7	19284.7	22728.7
FBgn0027570	Nep2	5748.23	-2.79459	0.353327	7.90934	2.58758e-15	1.28913e-13	1571.56	946.978	10900.2	7409.48	7912.98
FBgn0001296	kar	3552.08	-2.74845	0.300017	9.16097	5.14316e-20	3.93498e-18	972.135	629.679	6498.85	4930.62	4729.12
FBgn0031906	CG5160	33.8146	-2.74367	0.55948	4.90396	9.39217e-07	1.14196e-05	9.97527	4.91937	61.9666	41.9405	50.2715
FBgn0020269	mspo	20.0893	-2.69183	0.683625	3.93757	8.23093e-05	0.000606456	4.53421	4.91937	29.71	34.9504	26.3327
FBgn0033702	CG8854	30.2924	-2.64979	0.629431	4.20982	2.55571e-05	0.000216841	7.25474	7.37905	67.9086	40.1929	28.7266
FBgn0031914	CG5973	4357.72	-2.63769	0.336059	7.84889	4.19738e-15	2.00935e-13	1345.75	761.272	7631.23	5826.23	6224.09
FBgn0038315	CG14866	41.7828	-2.6296	0.608824	4.31915	1.5663e-05	0.000141878	7.25474	13.5283	76.3971	83.0072	28.7266
FBgn0036986	CG5282	14.1902	-2.59705	0.8384	3.09763	0.00195078	0.0092457	5.44106	1.22984	16.9771	20.9702	26.3327
FBgn0029568	CG11381	13646.1	-2.58362	0.386951	6.67686	2.4411e-11	7.16361e-10	4486.15	2341.62	18769.9	24599.8	18033.1
FBgn0267248	lncRNA:CR45688	16.1743	-2.54613	0.737208	3.45376	0.000552837	0.00316028	4.53421	3.68952	26.3146	23.5915	22.7419
FBgn0023214	edl	240.735	-2.52765	0.197799	12.7789	2.15223e-37	7.37699e-35	66.1995	57.8025	365.009	346.009	368.658
FBgn0039585	CG1894	42.3115	-2.50588	0.549749	4.55823	5.15863e-06	5.33257e-05	14.5095	7.37905	71.304	81.2596	37.1052
FBgn0036595	CG13046	27.294	-2.49217	0.606659	4.10802	3.9906e-05	0.000321386	8.16159	6.14921	52.6291	28.8341	40.696
FBgn0050460	CG30460	353.249	-2.48593	0.18125	13.7155	8.20099e-43	3.34639e-40	81.6159	108.226	533.082	560.954	482.367
FBgn0031530	Pgant2	76.4245	-2.48536	0.369389	6.72831	1.71644e-11	5.21566e-10	20.8574	19.6775	131.573	89.1235	120.891
FBgn0261801	CG42747	327.995	-2.47974	0.249857	9.92464	3.25285e-23	3.66759e-21	116.076	56.5727	534.78	442.996	489.549
FBgn0041709	yellow-g	13014.8	-2.47694	0.457993	5.40825	6.36452e-08	1.00623e-06	4554.16	2404.34	14351.6	25539.1	18224.6
FBgn0041713	yellow-c	23.062	-2.44941	0.614867	3.98365	6.78661e-05	0.000511023	6.3479	6.14921	34.8031	29.7078	38.3021
FBgn0040370	CG13375	390.344	-2.42226	0.715817	3.38391	0.000714607	0.00391542	90.6843	125.444	702.854	816.091	216.646
FBgn0035608	blanks	65.1245	-2.41484	0.58473	4.12984	3.6302e-05	0.000295135	19.0437	17.2178	113.747	143.297	32.3174
FBgn0001090	bnb	1710.42	-2.40905	0.343692	7.00931	2.39501e-12	8.07987e-11	559.522	393.549	2038.96	3309.8	2250.25
FBgn0010435	emp	3322.53	-2.40588	0.2847	8.45056	2.89918e-17	1.76192e-15	1113.6	741.594	5874.94	4650.15	4232.38
FBgn0262719	CG43163	43.5097	-2.39445	0.473656	5.05524	4.29843e-07	5.61483e-06	9.97527	14.7581	51.7803	62.0369	78.9981
FBgn0031926	CG6739	23.2542	-2.36131	0.611197	3.86342	0.000111809	0.000795759	8.16159	4.91937	29.71	37.5717	35.9082
FBgn0000422	Ddc	16.2605	-2.34826	0.712216	3.29712	0.000976811	0.00507598	4.53421	4.91937	23.768	25.339	22.7419
FBgn0029939	CG9650	271.296	-2.34574	0.254819	9.2055	3.40084e-20	2.67356e-18	83.4295	73.7905	461.778	452.607	284.872
FBgn0027585	CG8740	50.804	-2.33208	0.423092	5.51199	3.5479e-08	5.8624e-07	11.789	18.4476	69.6063	84.7547	69.4226
FBgn0050334	CG30334	60.8645	-2.31114	0.450052	5.13527	2.81734e-07	3.83204e-06	20.8574	14.7581	56.8734	110.094	101.74
FBgn0020300	geko	423.602	-2.30922	0.208726	11.0634	1.88816e-28	3.67718e-26	131.492	119.295	775.007	512.897	579.32
FBgn0036938	CG14187	4107.43	-2.27368	0.277372	8.19722	2.46007e-16	1.36002e-14	1406.51	1081.03	7390.15	4713.06	5946.4
FBgn0035328	yellow-g2	15586.8	-2.27306	0.405942	5.59948	2.14999e-08	3.69945e-07	6142.05	3303.35	17678.3	28111.5	22698.8
FBgn0035290	dsb	457.431	-2.26941	0.23325	9.72951	2.25669e-22	2.19745e-20	166.859	109.456	852.253	569.691	588.895
FBgn0031734	CG11147	2885.61	-2.26469	0.226073	10.0175	1.27691e-23	1.57134e-21	1025.64	730.526	4777.37	3664.55	4229.99
FBgn0039883	RhoGAP100F	535.296	-2.24168	0.233999	9.57987	9.71657e-22	8.85758e-20	148.722	183.246	1008.44	775.898	560.169
FBgn0260005	wtrw	574.143	-2.23561	0.4056	5.51186	3.55069e-08	5.8624e-07	239.406	115.605	979.581	791.626	744.497
FBgn0031717	Oscillin	157.306	-2.23276	0.259332	8.60967	7.32712e-18	4.65082e-16	46.249	51.6533	247.017	187.858	253.752
FBgn0000567	Eip74EF	1875.03	-2.22498	0.257482	8.64131	5.55731e-18	3.60762e-16	689.201	479.638	3233.3	2411.58	2561.45
FBgn0262636	dati	805.282	-2.21064	0.351221	6.29416	3.09059e-10	7.43913e-09	186.81	320.989	977.035	1118.41	1423.16
FBgn0034322	CG18536	25.4742	-2.20926	0.590754	3.73974	0.000184212	0.00122176	5.44106	11.0686	40.7451	40.1929	29.9235
FBgn0037290	CG1124	99.6254	-2.20451	0.486401	4.53229	5.83482e-06	5.95221e-05	42.6216	19.6775	84.0369	233.294	118.497
FBgn0034321	CG14502	93.3135	-2.20306	0.328311	6.71028	1.9425e-11	5.82002e-10	20.8574	39.3549	129.875	142.423	134.057
FBgn0032402	CG14945	34.3728	-2.2017	0.48686	4.52226	6.11839e-06	6.2119e-05	11.789	9.83873	55.1757	47.183	47.8777
FBgn0032025	CG7778	322.49	-2.19909	0.477565	4.60479	4.12892e-06	4.39621e-05	146.909	56.5727	464.325	449.112	495.534
FBgn0261799	dsx-c73A	25.5798	-2.19443	0.582083	3.76996	0.000163274	0.00110252	10.8821	4.91937	38.1986	33.2029	40.696
FBgn0037915	CG6790	45.4452	-2.18663	0.447138	4.89028	1.00694e-06	1.21699e-05	16.3232	12.2984	55.1757	62.0369	81.392
FBgn0033936	Achl	38.3865	-2.18105	0.523777	4.16408	3.12615e-05	0.000257577	14.5095	9.83873	40.7451	77.7646	49.0746
FBgn0040823	dpr6	876.562	-2.17166	0.123512	17.5826	3.35087e-69	4.7856e-66	309.233	253.347	1299.6	1336.85	1183.77
FBgn0034904	CG15800	42.1687	-2.1644	0.58376	3.7077	0.000209153	0.00136188	22.6711	3.68952	53.478	56.7944	74.2104
FBgn0030331	CG15221	318.492	-2.14306	0.22475	9.53531	1.49437e-21	1.34792e-19	126.051	81.1695	544.117	437.754	403.369
FBgn0011280	Obp19d	19.3383	-2.13849	0.654269	3.26851	0.00108116	0.00555755	5.44106	7.37905	29.71	21.844	32.3174
FBgn0035694	CG13299	5033.12	-2.12945	0.299543	7.10901	1.16878e-12	4.1046e-11	2091.18	1234.76	6476.78	8031.6	7331.27
FBgn0035086	CG12851	59.4591	-2.11484	0.365014	5.79385	6.87899e-09	1.33061e-07	19.9505	19.6775	81.4903	89.9972	86.1798
FBgn0036612	CG4998	273.167	-2.05189	0.541278	3.79083	0.000150147	0.00102847	115.169	73.7905	471.116	496.295	209.465
FBgn0035768	CG14834	13464.6	-2.01109	0.193795	10.3774	3.14102e-25	4.20553e-23	5589.78	3962.55	20552.5	19088.2	18130.1
FBgn0046776	CR14033	318.521	-2.00593	0.22097	9.07784	1.10749e-19	8.32467e-18	119.703	106.996	514.407	506.781	344.719
FBgn0029863	CG3823	219.587	-1.96173	0.239178	8.20196	2.36505e-16	1.31598e-14	89.7774	70.101	374.346	307.563	256.145
FBgn0039091	CG10182	45.9039	-1.93218	0.449481	4.29868	1.71816e-05	0.000153204	19.0437	14.7581	46.6871	76.0171	73.0134
FBgn0038460	CG18622	200.936	-1.90236	0.270148	7.04193	1.89598e-12	6.52477e-11	96.1253	54.113	234.285	300.573	319.583
FBgn0266088	lncRNA:CR44830	67.0656	-1.89749	0.350312	5.41656	6.07562e-08	9.659e-07	26.2984	24.5968	111.2	88.2497	84.9828
FBgn0024989	CG3777	336.324	-1.83782	0.209405	8.77638	1.68819e-18	1.16662e-16	154.163	108.226	505.919	391.444	521.866
FBgn0051391	CG31391	22.4451	-1.82282	0.589283	3.09329	0.00197953	0.00933547	9.06843	8.60889	29.71	25.339	39.4991
FBgn0036116	CG7888	585.031	-1.81692	0.186553	9.73942	2.04713e-22	2.0163e-20	274.773	188.166	693.516	920.069	848.631
FBgn0036715	Cad74A	6047.07	-1.81053	0.2036	8.89257	5.97097e-19	4.26377e-17	2860.18	1966.52	8871.41	8286.74	8250.52
FBgn0037217	CG14636	99.9737	-1.75883	0.429189	4.09803	4.16684e-05	0.000333697	53.5037	28.2864	198.633	138.054	81.392
FBgn0004666	sim	1654.77	-1.75663	0.332286	5.28651	1.24673e-07	1.83561e-06	828.854	533.751	2892.06	2035.86	1983.33
FBgn0032021	CG7781	31.1213	-1.74631	0.506456	3.44809	0.000564563	0.00321231	9.06843	17.2178	39.0474	47.183	43.0899
FBgn0034903	sona	6086.41	-1.74271	0.294249	5.92258	3.16921e-09	6.59149e-08	2852.02	2202.65	10820.4	7213.76	7343.23
FBgn0034438	CG9416	36.6581	-1.71905	0.455898	3.77069	0.000162797	0.00110026	12.6958	18.4476	48.3849	46.3093	57.4532
FBgn0034606	ASPP	334.577	-1.71237	0.211507	8.09606	5.67699e-16	3.0215e-14	162.325	119.295	560.246	413.288	417.733
FBgn0039709	Cad99C	1845.95	-1.70706	0.141617	12.054	1.84653e-33	4.65381e-31	858.78	704.699	3038.06	2360.02	2268.2
FBgn0037916	CG5342	27.1388	-1.70519	0.541383	3.14969	0.00163444	0.00792166	11.789	11.0686	30.5589	33.2029	49.0746
FBgn0250862	CG42237	263.431	-1.70226	0.233904	7.27762	3.39765e-13	1.28257e-11	139.654	82.3994	410.847	331.155	353.098
FBgn0030993	Mec2	34.8411	-1.66384	0.478052	3.48047	0.000500538	0.00289339	14.5095	15.9879	59.42	47.183	37.1052
FBgn0267428	DIP-lambda	56.3905	-1.65175	0.426541	3.87242	0.000107759	0.000770127	29.019	19.6775	55.1757	75.1433	102.937
FBgn0052645	CG32645	1818.45	-1.64982	0.284842	5.79204	6.9538e-09	1.34205e-07	1000.25	591.554	2399.72	2697.3	2403.46
FBgn0036279	Ncc69	1206.57	-1.64832	0.157266	10.4811	1.05488e-25	1.48185e-23	545.013	512.844	2038.11	1402.38	1534.48
FBgn0028523	CG5888	190.401	-1.64621	0.219117	7.51292	5.78219e-14	2.3936e-12	97.0322	68.8711	261.448	280.477	244.176
FBgn0015569	alpha-Est10	1738.56	-1.64148	0.253467	6.4761	9.41235e-11	2.52045e-09	584.007	948.208	2439.62	2394.1	2326.85
FBgn0037963	Cad87A	5161.49	-1.61785	0.213849	7.56538	3.86733e-14	1.64055e-12	2320.61	2285.05	8677.02	6452.71	6072.08
FBgn0264502	CG43901	155.753	-1.61343	0.24548	6.57256	4.94578e-11	1.37153e-09	76.1748	62.7219	201.179	250.769	187.92
FBgn0050401	dany	96.8159	-1.58666	0.324079	4.89591	9.78523e-07	1.18599e-05	46.249	41.8146	159.585	140.675	95.7553
FBgn0052205	hpRNA:CR32205	395.874	-1.57668	0.144058	10.9448	7.03999e-28	1.28353e-25	194.064	166.029	553.455	526.003	539.821
FBgn0034966	CG13563	79.662	-1.56632	0.331354	4.72703	2.27827e-06	2.55196e-05	40.8079	31.9759	129.875	89.1235	106.528
FBgn0036834	CG6836	264.648	-1.56284	0.176629	8.84813	8.90005e-19	6.25119e-17	134.213	108.226	374.346	361.736	344.719
FBgn0033763	CG8646	221.339	-1.56191	0.219609	7.11221	1.14197e-12	4.02698e-11	83.4295	121.754	292.007	274.36	335.144
FBgn0034490	CG9864	472.407	-1.5343	0.157984	9.71176	2.68659e-22	2.55793e-20	235.779	205.384	601.84	731.337	587.698
FBgn0053056	CG33056	1680.89	-1.52817	0.13153	11.6184	3.32166e-31	7.49034e-29	883.265	692.401	2538.93	2281.39	2008.47
FBgn0263316	Mrp4	114.017	-1.51403	0.273023	5.54541	2.93265e-08	4.93711e-07	42.6216	66.4114	153.643	149.413	157.996
FBgn0026878	CG4325	143.563	-1.50413	0.256099	5.87324	4.27353e-09	8.63676e-08	65.2927	71.3308	205.423	155.529	220.237
FBgn0025390	Mur2B	11519.8	-1.49489	0.209232	7.14465	9.02267e-13	3.22147e-11	6263.56	4753.34	14071.5	17994.2	14516.5
FBgn0051522	CG31522	3648.04	-1.48928	0.103034	14.4543	2.35499e-47	1.12111e-44	1559.77	1944.38	5002.32	4546.17	5187.54
FBgn0001224	Hsp23	2232.17	-1.48924	0.0837855	17.7745	1.11446e-70	1.90997e-67	1034.71	1108.09	3007.5	2823.12	3187.45
FBgn0020294	ko	569.148	-1.48196	0.205408	7.21471	5.40475e-13	1.99395e-11	275.68	273.025	1001.65	633.476	661.909
FBgn0003867	tsl	171.542	-1.47634	0.273381	5.4003	6.65312e-08	1.04799e-06	91.5911	73.7905	297.949	186.111	208.268
FBgn0010470	Fkbp14	2335.67	-1.46406	0.121611	12.0389	2.21997e-33	5.43511e-31	1279.56	990.022	3480.31	2980.39	2948.07
FBgn0031760	Tsp26A	461.139	-1.45749	0.135458	10.7597	5.33329e-27	8.62282e-25	234.872	213.992	597.595	598.525	660.712
FBgn0031762	CG9098	775.492	-1.44143	0.179287	8.03978	9.00033e-16	4.73152e-14	399.011	365.263	1308.09	934.923	870.176
FBgn0000075	amd	2811.06	-1.43242	0.317763	4.50782	6.54967e-06	6.55655e-05	1628.69	1154.82	4801.99	3329.02	3140.77
FBgn0039043	CG17121	126.72	-1.41397	0.260724	5.42323	5.8531e-08	9.32252e-07	70.7337	55.3429	146.852	193.101	167.572
FBgn0051431	CG31431	115.784	-1.40568	0.27467	5.11771	3.0926e-07	4.1733e-06	47.1558	70.101	153.643	138.054	169.966
FBgn0038292	CG3987	44.1832	-1.39343	0.399469	3.48819	0.000486296	0.00283281	23.5779	20.9073	61.1177	50.6781	64.6348
FBgn0039594	snu	4220.58	-1.39041	0.278867	4.98593	6.16648e-07	7.79697e-06	2478.4	1799.26	6821.42	4527.82	5476.01
FBgn0261565	Lmpt	899.812	-1.38789	0.136495	10.1681	2.75267e-24	3.52054e-22	473.372	440.283	1339.5	1228.51	1017.4
FBgn0083978	CG17672	72.3566	-1.38162	0.421423	3.27846	0.00104376	0.00538469	29.019	45.5041	129.875	98.7348	58.6501
FBgn0004919	gol	59.0621	-1.3627	0.355319	3.83516	0.000125484	0.00088209	24.4848	36.8952	72.1529	80.3859	81.392
FBgn0045800	Uhg1	652.232	-1.35902	0.125599	10.8203	2.75782e-27	4.72635e-25	310.14	364.033	838.671	823.081	925.236
FBgn0032713	Ugt36D1	109.126	-1.35847	0.366889	3.70268	0.000213337	0.00138491	68.0132	44.2743	153.643	188.732	90.9675
FBgn0030884	CG6847	77.7261	-1.35	0.296184	4.55796	5.16517e-06	5.33257e-05	39.9011	40.5848	100.165	97.8611	110.119
FBgn0261625	GLS	473.187	-1.34781	0.252903	5.32936	9.85593e-08	1.49479e-06	281.121	209.073	451.592	848.42	575.729
FBgn0264942	lncRNA:CR44111	67.1015	-1.34258	0.315402	4.25674	2.07432e-05	0.000180137	35.3669	34.4356	86.5834	91.7447	87.3767
FBgn0051710	CG31710	118.421	-1.32773	0.260651	5.09391	3.50759e-07	4.70368e-06	70.7337	52.8832	174.016	152.034	142.436
FBgn0034797	nahoda	1427.47	-1.31672	0.145445	9.05304	1.39041e-19	1.03603e-17	833.389	671.493	2185.81	1603.35	1843.29
FBgn0262624	Tmhs	2331.89	-1.31529	0.0829206	15.862	1.16118e-56	8.2918e-54	1301.32	1159.74	3191.7	3095.73	2910.96
FBgn0003748	Treh	5281.1	-1.31472	0.0828785	15.8632	1.13927e-56	8.2918e-54	3032.48	2543.31	7200.01	6776	6853.69
FBgn0029965	Ir7b	115.746	-1.30924	0.314202	4.16687	3.08809e-05	0.00025567	80.709	40.5848	135.817	166.014	155.602
FBgn0262476	CG43066	399.712	-1.30286	0.183973	7.08179	1.423e-12	4.95678e-11	206.76	218.912	446.499	630.854	495.534
FBgn0032253	LManI	143.351	-1.29929	0.292043	4.44898	8.62803e-06	8.34465e-05	58.9448	94.6978	196.086	146.792	220.237
FBgn0038803	CG5191	2391.84	-1.29193	0.134054	9.63738	5.55866e-22	5.17741e-20	1383.84	1174.5	3709.51	2974.28	2717.06
FBgn0035147	Gale	4108.52	-1.28147	0.211955	6.04594	1.48538e-09	3.22234e-08	2611.71	1807.87	5750.16	5070.43	5302.45
FBgn0038183	CG9286	342.386	-1.26321	0.144459	8.74443	2.24135e-18	1.52429e-16	189.53	182.017	446.499	434.258	459.625
FBgn0037973	CG18547	241.478	-1.25406	0.20354	6.16122	7.21854e-10	1.6539e-08	131.492	131.593	280.123	288.341	375.84
FBgn0040658	CG13516	80.2632	-1.25165	0.295533	4.23521	2.28338e-05	0.000195859	48.0627	39.3549	113.747	99.6086	100.543
FBgn0025387	CG12184	47.7471	-1.24961	0.376647	3.31772	0.000907556	0.00477987	26.2984	25.8267	56.0246	61.1632	69.4226
FBgn0033668	exp	174.509	-1.24544	0.225916	5.51284	3.53091e-08	5.8523e-07	102.473	88.5486	262.297	196.596	222.631
FBgn0015576	alpha-Est8	334.201	-1.23675	0.290214	4.26151	2.03049e-05	0.000177182	213.108	154.96	629.003	336.397	337.537
FBgn0015766	Msr-110	4194.78	-1.23351	0.257943	4.78212	1.73458e-06	1.98977e-05	2761.34	1870.59	6350.3	5059.07	4932.6
FBgn0259993	lncRNA:CR42491	171.317	-1.20152	0.230472	5.21331	1.85505e-07	2.63615e-06	88.8706	104.537	261.448	201.838	199.889
FBgn0000360	Cp38	205308	-1.1999	0.338332	3.54652	0.000390355	0.00233261	137373	93524.5	226292	342038	227312
FBgn0264676	lncRNA:CR43961	190.327	-1.19714	0.265462	4.50965	6.49337e-06	6.52306e-05	128.772	84.8591	295.402	249.895	192.708
FBgn0029856	CG11700	259.668	-1.19346	0.180768	6.60216	4.05212e-11	1.14976e-09	157.791	134.053	300.495	356.494	349.507
FBgn0027608	CG2082	226.296	-1.19282	0.245639	4.85598	1.1979e-06	1.42765e-05	92.498	164.799	270.785	300.573	302.826
FBgn0025879	Timp	250.146	-1.19249	0.2244	5.31414	1.07162e-07	1.59699e-06	134.213	148.811	266.541	401.929	299.235
FBgn0038407	CG6126	1377.52	-1.18869	0.12329	9.64138	5.34619e-22	5.03423e-20	818.879	739.135	2045.75	1658.4	1625.45
FBgn0045842	yuri	586.987	-1.18845	0.180191	6.59551	4.23793e-11	1.19457e-09	389.942	271.795	828.485	643.961	800.754
FBgn0027364	Six4	99.789	-1.17681	0.269363	4.36885	1.249e-05	0.000115207	53.5037	60.2622	132.422	112.715	140.042
FBgn0028833	Dak1	2626.14	-1.16474	0.0773511	15.0579	3.06458e-51	1.64127e-48	1514.43	1493.03	3270.65	3239.03	3613.57
FBgn0004635	rho	186.358	-1.16181	0.258062	4.50207	6.72958e-06	6.72703e-05	97.0322	116.835	187.597	226.304	304.023
FBgn0003162	Pu	102.801	-1.16178	0.291376	3.98722	6.68527e-05	0.000505034	59.8516	57.8025	140.91	102.23	153.208
FBgn0037956	CG6959	137.028	-1.14297	0.228453	5.00309	5.64198e-07	7.20509e-06	83.4295	75.0203	188.446	159.898	178.344
FBgn0031816	Rchy1	124.832	-1.14062	0.24375	4.67947	2.87619e-06	3.15571e-05	78.8953	65.1816	143.457	164.267	172.36
FBgn0036756	Cln3	237.941	-1.13821	0.170178	6.68838	2.25658e-11	6.66781e-10	139.654	136.512	293.705	301.447	318.386
FBgn0039178	CG6356	169.823	-1.1362	0.257056	4.42005	9.86796e-06	9.40585e-05	77.9885	120.524	195.237	199.217	256.145
FBgn0086408	stl	1437.72	-1.13571	0.113765	9.98297	1.80965e-23	2.18406e-21	846.084	826.453	1991.42	1596.36	1928.27
FBgn0050015	CG30015	632.528	-1.13301	0.150385	7.53403	4.91983e-14	2.05649e-12	393.57	343.126	939.685	754.928	731.331
FBgn0263038	CG43333	2972.28	-1.12712	0.334368	3.3709	0.000749217	0.00406589	2046.74	1427.85	2877.63	4798.69	3710.52
FBgn0020414	Idgf3	138.135	-1.1004	0.27329	4.02651	5.66112e-05	0.000435851	84.3364	78.7099	150.248	151.16	226.222
FBgn0266005	lncRNA:CR44779	177.133	-1.09276	0.226791	4.81836	1.44742e-06	1.68977e-05	95.2185	116.835	263.146	210.576	199.889
FBgn0032694	MESR3	711.586	-1.09178	0.115414	9.45973	3.08747e-21	2.59378e-19	396.29	453.811	954.964	875.507	877.358
FBgn0051116	ClC-a	619.897	-1.08753	0.172935	6.28865	3.2023e-10	7.66495e-09	423.496	314.839	914.219	683.28	763.649
FBgn0030927	CG15046	123.658	-1.08633	0.350962	3.09529	0.00196623	0.0092881	99.7527	46.734	184.202	118.831	168.769
FBgn0017482	T3dh	103.017	-1.0848	0.326194	3.32561	0.000882249	0.00466378	62.5722	60.2622	146.003	88.2497	157.996
FBgn0025631	moody	196.193	-1.08267	0.204842	5.28538	1.25443e-07	1.84233e-06	111.542	124.214	243.622	281.351	220.237
FBgn0263200	Galt	68.8443	-1.06826	0.332433	3.21345	0.00131151	0.00655549	48.9695	33.2057	83.188	79.5121	99.3461
FBgn0003285	rst	664.085	-1.06708	0.187264	5.69825	1.21043e-08	2.22579e-07	390.849	411.997	897.242	994.338	626
FBgn0033205	CG2064	131.418	-1.06607	0.251487	4.23908	2.2444e-05	0.000192708	88.8706	68.8711	178.26	141.549	179.541
FBgn0261584	CG42694	305.606	-1.06548	0.152765	6.97463	3.06687e-12	1.0186e-10	189.53	179.557	399.812	394.066	365.067
FBgn0034761	CG4250	65.4187	-1.05714	0.323033	3.27254	0.00106585	0.00548544	35.3669	44.2743	75.5483	82.1334	89.7706
FBgn0030658	CG7872	2826.99	-1.05344	0.108124	9.74283	1.97963e-22	1.97249e-20	1837.26	1597.56	4033.77	3308.93	3357.42
FBgn0024315	Picot	1905.76	-1.05279	0.0999414	10.534	6.02044e-26	8.89467e-24	1256.88	1057.66	2581.37	2321.58	2311.29
FBgn0031263	Tspo	295.408	-1.05105	0.17143	6.13109	8.72791e-10	1.97334e-08	188.623	169.718	329.357	383.58	405.763
FBgn0264273	Sema2b	960.99	-1.04675	0.30524	3.42928	0.000605191	0.00340952	557.708	614.921	1583.12	915.7	1133.5
FBgn0053062	CG33062	152.056	-1.0455	0.230156	4.54258	5.55689e-06	5.69581e-05	84.3364	102.077	173.167	217.566	183.132
FBgn0035131	mthl9	78.5048	-1.04522	0.310633	3.3648	0.000765999	0.00413258	54.4106	40.5848	89.13	93.4923	114.906
FBgn0036194	Dph1	2552.6	-1.03782	0.109289	9.49613	2.17836e-21	1.90639e-19	1756.55	1367.58	3049.1	3396.3	3193.44
FBgn0035167	Gr61a	106.757	-1.03231	0.251674	4.10179	4.09965e-05	0.000328931	71.6406	59.0324	140.061	130.19	132.86
FBgn0285992	hpRNA:CR46342	110.033	-1.03185	0.312006	3.30716	0.000942463	0.00493038	75.268	59.0324	105.258	131.064	179.541
FBgn0033437	CG12926	64.7121	-1.02408	0.3295	3.10799	0.00188364	0.00898216	38.0874	41.8146	85.7346	68.1532	89.7706
FBgn0038419	CG14879	385.882	-1.02317	0.173386	5.90113	3.6101e-09	7.40071e-08	247.568	227.521	457.534	424.647	572.138
FBgn0004045	Yp1	17412.3	-1.0199	0.0940435	10.8449	2.10791e-27	3.76306e-25	10053.3	11492.9	22995.5	23245.5	19274.3
FBgn0016650	Lgr1	96.4236	-1.01519	0.292968	3.46519	0.000529852	0.00304106	69.8269	49.1937	140.91	114.462	107.725
FBgn0005564	Shal	128.663	-1.00306	0.246687	4.06613	4.7801e-05	0.000376131	88.8706	71.3308	181.655	159.024	142.436

## Sheet: downregulated-GO
source	term_name	term_id	adjusted_p_value	negative_log10_of_adjusted_p_value	term_size	query_size	intersection_size	effective_domain_size	intersections
GO:MF	aromatic-L-amino-acid decarboxylase activity	GO:0004058	0.0499086	1.30182	2	197	2	17807	FBGN0000422,FBGN0000075
GO:BP	cuticle pigmentation	GO:0048067	0.0406693	1.39073	35	197	5	17807	FBGN0041709,FBGN0041713,FBGN0000422,FBGN0035328,FBGN0003162
GO:CC	intrinsic component of membrane	GO:0031224	8.63884e-08	7.06354	3203	197	72	17807	FBGN0264000,FBGN0030576,FBGN0005775,FBGN0037410,FBGN0034439,FBGN0033483,FBGN0037534,FBGN0037415,FBGN0032614,FBGN0038395,FBGN0027570,FBGN0001296,FBGN0036986,FBGN0031530,FBGN0261801,FBGN0040370,FBGN0010435,FBGN0031926,FBGN0020300,FBGN0035290,FBGN0031734,FBGN0260005,FBGN0037915,FBGN0030331,FBGN0039091,FBGN0038460,FBGN0036116,FBGN0036715,FBGN0032021,FBGN0034438,FBGN0039709,FBGN0037916,FBGN0030993,FBG…
GO:CC	integral component of membrane	GO:0016021	1.603e-07	6.79507	3177	197	71	17807	FBGN0264000,FBGN0030576,FBGN0037410,FBGN0034439,FBGN0033483,FBGN0037534,FBGN0037415,FBGN0032614,FBGN0038395,FBGN0027570,FBGN0001296,FBGN0036986,FBGN0031530,FBGN0261801,FBGN0040370,FBGN0010435,FBGN0031926,FBGN0020300,FBGN0035290,FBGN0031734,FBGN0260005,FBGN0037915,FBGN0030331,FBGN0039091,FBGN0038460,FBGN0036116,FBGN0036715,FBGN0032021,FBGN0034438,FBGN0039709,FBGN0037916,FBGN0030993,FBGN0267428,FBG…
GO:CC	membrane	GO:0016020	0.000313936	3.50316	4190	197	76	17807	FBGN0264000,FBGN0030576,FBGN0005775,FBGN0037410,FBGN0034439,FBGN0033483,FBGN0037534,FBGN0037415,FBGN0032614,FBGN0038395,FBGN0027570,FBGN0001296,FBGN0031906,FBGN0036986,FBGN0031530,FBGN0261801,FBGN0040370,FBGN0010435,FBGN0031926,FBGN0020300,FBGN0035290,FBGN0031734,FBGN0260005,FBGN0037915,FBGN0040823,FBGN0030331,FBGN0039091,FBGN0038460,FBGN0036116,FBGN0036715,FBGN0032021,FBGN0034438,FBGN0039709,FBG…
GO:CC	cell periphery	GO:0071944	0.00144404	2.84042	1687	197	39	17807	FBGN0264000,FBGN0030576,FBGN0005775,FBGN0037410,FBGN0033483,FBGN0037415,FBGN0027570,FBGN0001296,FBGN0029568,FBGN0040370,FBGN0010435,FBGN0036938,FBGN0031734,FBGN0039883,FBGN0040823,FBGN0030331,FBGN0035694,FBGN0036715,FBGN0039709,FBGN0030993,FBGN0267428,FBGN0036279,FBGN0028523,FBGN0037963,FBGN0036834,FBGN0034490,FBGN0025390,FBGN0031760,FBGN0039594,FBGN0262476,FBGN0036756,FBGN0051116,FBGN0025631,FBG…
GO:CC	integral component of plasma membrane	GO:0005887	0.0033287	2.47773	562	197	19	17807	FBGN0264000,FBGN0030576,FBGN0037410,FBGN0033483,FBGN0037415,FBGN0001296,FBGN0010435,FBGN0030331,FBGN0036715,FBGN0039709,FBGN0267428,FBGN0028523,FBGN0037963,FBGN0034490,FBGN0031760,FBGN0051116,FBGN0024315,FBGN0016650,FBGN0005564
GO:CC	intrinsic component of plasma membrane	GO:0031226	0.00467557	2.33017	576	197	19	17807	FBGN0264000,FBGN0030576,FBGN0037410,FBGN0033483,FBGN0037415,FBGN0001296,FBGN0010435,FBGN0030331,FBGN0036715,FBGN0039709,FBGN0267428,FBGN0028523,FBGN0037963,FBGN0034490,FBGN0031760,FBGN0051116,FBGN0024315,FBGN0016650,FBGN0005564
GO:CC	plasma membrane	GO:0005886	0.0161022	1.79312	1542	197	34	17807	FBGN0264000,FBGN0030576,FBGN0005775,FBGN0037410,FBGN0033483,FBGN0037415,FBGN0027570,FBGN0001296,FBGN0040370,FBGN0010435,FBGN0031734,FBGN0040823,FBGN0030331,FBGN0036715,FBGN0039709,FBGN0030993,FBGN0267428,FBGN0036279,FBGN0028523,FBGN0037963,FBGN0036834,FBGN0034490,FBGN0031760,FBGN0039594,FBGN0262476,FBGN0036756,FBGN0051116,FBGN0025631,FBGN0003285,FBGN0024315,FBGN0035131,FBGN0035167,FBGN0016650,FBG…
GO:CC	cellular_component	GO:0005575	0.0169065	1.77195	11692	197	154	17807	FBGN0037975,FBGN0034788,FBGN0063499,FBGN0028986,FBGN0013813,FBGN0264000,FBGN0030576,FBGN0005775,FBGN0031111,FBGN0037410,FBGN0034439,FBGN0033483,FBGN0050485,FBGN0035325,FBGN0037534,FBGN0037415,FBGN0032614,FBGN0038395,FBGN0027570,FBGN0001296,FBGN0031906,FBGN0020269,FBGN0033702,FBGN0031914,FBGN0036986,FBGN0029568,FBGN0023214,FBGN0039585,FBGN0031530,FBGN0261801,FBGN0041709,FBGN0041713,FBGN0040370,FBG…
GO:CC	transmembrane transporter complex	GO:1902495	0.0433288	1.36322	109	197	7	17807	FBGN0264000,FBGN0031734,FBGN0260005,FBGN0028523,FBGN0039594,FBGN0051116,FBGN0005564

## Sheet: upregulated genes
Upregulated gene list
filtered according to baseMean>10, padj<0.01, and log2FoldChange>1.
Gene_ID	Gene_name	baseMean	log2FoldChange	lfcSE	stat	pvalue	padj	ftzf1_rep1	ftzf1_rep2	control_rep1	control_rep2	control_rep3
FBgn0028400	Syt4	296.799	10.192	1.03394	-9.85744	6.36531e-23	6.81805e-21	682.853	799.397	0	1.74752	0
FBgn0267014	CR45458	59.0793	9.70646	1.222	-7.94308	1.97216e-15	9.99966e-14	147.815	147.581	0	0	0
FBgn0052581	CG32581	258.09	8.99108	0.739531	-12.1578	5.21342e-34	1.35375e-31	647.486	639.518	1.69771	1.74752	0
FBgn0004034	y	40.1679	8.1858	1.25175	-6.5395	6.17243e-11	1.68983e-09	118.796	81.1695	0	0.87376	0
FBgn0033728	Cpr49Ae	142.302	8.12011	0.753639	-10.7745	4.54031e-27	7.4819e-25	327.37	380.021	0.848857	0.87376	2.39388
FBgn0033519	CG11825	114.284	7.87026	1.53249	-5.1356	2.81244e-07	3.83144e-06	266.612	301.311	0	3.49504	0
FBgn0265638	lncRNA:CR44445	94.3056	7.52839	0.765835	-9.83031	8.33611e-23	8.81878e-21	226.711	241.049	1.69771	0.87376	1.19694
FBgn0265002	CG44153	891.96	7.51885	0.253754	-29.6305	6.04527e-193	2.5901e-81	2255.32	2166.98	7.63971	13.1064	16.7572
FBgn0032303	CG6508	63.3478	7.36078	0.917446	-8.02312	1.03096e-15	5.35412e-14	113.355	200.464	0.848857	0.87376	1.19694
FBgn0030562	CG9400	22.1652	7.31769	1.29354	-5.6571	1.53949e-08	2.78898e-07	61.6653	47.9638	0	0	1.19694
FBgn0052499	Cda4	10.7853	7.2434	1.52174	-4.75995	1.93638e-06	2.20943e-05	10.8821	43.0444	0	0	0
FBgn0267520	28SrRNA-Psi:CR45860	65.4359	6.9944	1.25643	-5.56689	2.5933e-08	4.38303e-07	3.62737	319.759	0.848857	1.74752	1.19694
FBgn0051928	CG31928	862.287	6.73197	1.13955	-5.90757	3.47183e-09	7.15147e-08	1950.62	2301.03	5.09314	46.3093	8.37859
FBgn0026077	Gasp	11.0594	6.29636	1.43486	-4.38812	1.14333e-05	0.00010719	16.3232	38.1251	0.848857	0	0
FBgn0032685	CG10211	30.4933	5.87707	0.845012	-6.95501	3.52535e-12	1.16636e-10	79.8022	68.8711	0.848857	1.74752	1.19694
FBgn0004910	Eip63F-1	102.598	5.71027	0.458851	-12.4447	1.49402e-35	4.41457e-33	215.829	282.864	3.39543	6.11632	4.78777
FBgn0065098	RNaseMRP:RNA	144.019	5.66371	1.6911	-3.34913	0.000810668	0.00433892	8.16159	691.171	5.942	5.24256	9.57553
FBgn0265533	CR44383	25.892	5.61801	0.888459	-6.32332	2.55999e-10	6.29059e-09	76.1748	49.1937	1.69771	0	2.39388
FBgn0003965	v	11.992	5.49857	1.23125	-4.46583	7.97577e-06	7.79297e-05	30.8327	27.0565	0	0.87376	1.19694
FBgn0053128	CG33128	11.3435	5.45164	1.28329	-4.24816	2.15535e-05	0.000185994	21.7642	33.2057	0	1.74752	0
FBgn0000357	Cp18	4727.55	5.42632	0.0754284	-71.9399	0	2.5901e-82	11452.5	11387.1	253.808	272.613	271.706
FBgn0259226	CG42326	95.1265	5.41519	0.453075	-11.9521	6.33256e-33	1.50733e-30	222.176	237.359	1.69771	9.61135	4.78777
FBgn0032405	firl	16.5569	5.35685	1.02837	-5.20909	1.89769e-07	2.67896e-06	42.6216	36.8952	0	0.87376	2.39388
FBgn0003382	sha	20.5901	5.28674	0.912281	-5.79508	6.82871e-09	1.32387e-07	46.249	52.8832	0	2.62128	1.19694
FBgn0033524	Cyp49a1	23.2742	5.14389	0.832146	-6.18148	6.35032e-10	1.47469e-08	45.3421	66.4114	2.54657	0.87376	1.19694
FBgn0013688	mt:srRNA	481.67	5.04771	1.58512	-3.18444	0.00145035	0.00714257	33.5532	2270.29	28.8611	34.9504	40.696
FBgn0013277	Hsp70Ba	21.9475	5.01871	0.937264	-5.35464	8.5729e-08	1.31887e-06	23.5779	81.1695	0.848857	1.74752	2.39388
FBgn0032891	Oseg5	84.1798	4.98834	0.420107	-11.874	1.61585e-32	3.74223e-30	186.81	215.222	7.63971	5.24256	5.98471
FBgn0000355	Cp15	4520.18	4.87072	0.280646	-17.3554	1.79668e-67	2.19939e-64	9838.34	11661.4	320.019	473.578	307.614
FBgn0003149	Prm	6135.37	4.82816	0.348791	-13.8425	1.41124e-43	6.04645e-41	14886.7	14252.6	702.854	445.617	389.006
FBgn0030569	CG9411	65.0299	4.75895	0.476867	-9.97962	1.87185e-23	2.22776e-21	184.996	122.984	5.942	5.24256	5.98471
FBgn0045761	CHKov1	20.9396	4.71003	0.880879	-5.34697	8.94368e-08	1.3661e-06	25.3916	73.7905	1.69771	2.62128	1.19694
FBgn0030438	CG15721	758.513	4.50513	1.359	-3.31504	0.000916313	0.00482007	1547.98	2009.56	5.09314	148.539	81.392
FBgn0035452	CG10359	21.0472	4.4895	0.754921	-5.94698	2.73141e-09	5.73663e-08	43.5285	55.3429	2.54657	2.62128	1.19694
FBgn0086661	snoRNA:Psi28S-2566	11.8048	4.4489	1.34757	-3.30143	0.000961939	0.00501085	3.62737	51.6533	2.54657	0	1.19694
FBgn0037427	Osi17	34.6417	4.41858	0.617379	-7.157	8.24599e-13	2.99406e-11	101.566	60.2622	2.54657	5.24256	3.59082
FBgn0035928	CG13310	72.6435	4.40932	0.413318	-10.6681	1.43541e-26	2.15789e-24	188.623	150.041	6.79086	6.99008	10.7725
FBgn0036862	Gbs-76A	119.242	4.37163	0.328398	-13.312	1.97173e-40	7.67988e-38	278.401	276.714	15.2794	7.86384	17.9541
FBgn0032082	CG18088	10.6694	4.33207	1.19606	-3.62193	0.000292408	0.00182096	15.4163	34.4356	0	3.49504	0
FBgn0267519	28SrRNA-Psi:CR45859	73.9665	4.01312	1.14421	-3.50733	0.000452622	0.00265476	30.8327	307.46	10.1863	6.99008	14.3633
FBgn0038001	CG17404	90.3495	3.85034	0.405936	-9.48509	2.42184e-21	2.09623e-19	157.791	250.888	7.63971	17.4752	17.9541
FBgn0004187	snRNA:U1:95Cc	18.4701	3.84134	1.1181	-3.43558	0.000591279	0.00333333	3.62737	79.9397	1.69771	3.49504	3.59082
FBgn0083058	snoRNA:Psi18S-1086	15.8406	3.80996	1.20991	-3.14897	0.00163845	0.00793662	2.72053	68.8711	0.848857	4.3688	2.39388
FBgn0002917	na	18.6697	3.69457	0.770105	-4.79748	1.60674e-06	1.86307e-05	52.5969	30.746	0.848857	4.3688	4.78777
FBgn0034247	CG6484	10.194	3.59207	0.926672	-3.87631	0.000106052	0.000761424	20.8574	24.5968	1.69771	2.62128	1.19694
FBgn0036481	CG16959	178.446	3.58186	0.232365	-15.4148	1.30222e-53	7.97049e-51	414.427	377.561	33.1054	28.8341	38.3021
FBgn0033598	Cpr47Eb	183.662	3.56138	0.360039	-9.89163	4.52608e-23	4.90936e-21	517.807	295.162	21.2214	31.4553	52.6654
FBgn0038339	CG6118	30.0728	3.55693	0.536381	-6.63134	3.32649e-11	9.59754e-10	67.1064	66.4114	5.942	6.11632	4.78777
FBgn0030617	CG9095	149.012	3.53539	0.273383	-12.932	2.97057e-38	1.06062e-35	290.19	368.952	30.5589	21.844	33.5144
FBgn0034460	CG18367	45.4424	3.48971	0.562909	-6.19943	5.66687e-10	1.32676e-08	126.958	72.5606	3.39543	8.7376	15.5602
FBgn0085427	CG34398	24.7263	3.45325	0.668839	-5.16305	2.42955e-07	3.35247e-06	66.1995	41.8146	2.54657	3.49504	9.57553
FBgn0065076	snoRNA:185	27.4138	3.42095	0.938339	-3.64575	0.000266615	0.00168482	8.16159	111.916	4.24429	4.3688	8.37859
FBgn0000024	Ace	278.037	3.36746	0.313322	-10.7476	6.08288e-27	9.65263e-25	828.854	384.94	52.6291	69.9008	53.8624
FBgn0035260	CG7991	10.2495	3.32699	1.0262	-3.24206	0.0011867	0.00601351	16.3232	28.2864	4.24429	0	2.39388
FBgn0033443	CG1698	33.991	3.28313	0.56189	-5.84301	5.12644e-09	1.01922e-07	58.9448	88.5486	4.24429	12.2326	5.98471
FBgn0013275	Hsp70Aa	58.6383	3.2449	0.491059	-6.60796	3.89657e-11	1.10929e-09	77.9885	175.867	16.9771	13.9802	8.37859
FBgn0265052	St3	241.352	3.23836	0.560537	-5.77725	7.59311e-09	1.4459e-07	683.759	356.654	44.9894	37.5717	83.7859
FBgn0001323	knrl	11.8338	3.22901	0.969827	-3.32947	0.00087012	0.00460819	14.5095	36.8952	3.39543	4.3688	0
FBgn0038695	CG14280	44.3788	3.19578	0.423789	-7.54096	4.6652e-14	1.95961e-12	96.1253	94.6978	11.884	9.61135	9.57553
FBgn0260964	Vmat	16.3117	3.16357	0.880977	-3.59098	0.000329433	0.00201063	19.9505	50.4235	5.942	5.24256	0
FBgn0024944	Oamb	52.4852	3.12336	0.660033	-4.73212	2.22185e-06	2.50184e-05	92.498	131.593	2.54657	26.2128	9.57553
FBgn0085400	side-V	47.4468	3.10221	0.531291	-5.839	5.25162e-09	1.03929e-07	109.728	91.0083	7.63971	6.11632	22.7419
FBgn0032523	CG16956	928.335	3.0385	0.155361	-19.5576	3.55085e-85	1.01424e-81	1986.89	1937	184.202	282.224	251.358
FBgn0086027	snoRNA:Or-CD1	23.1875	2.91347	0.675771	-4.31133	1.62274e-05	0.000145757	25.3916	71.3308	6.79086	5.24256	7.18165
FBgn0267191	lncRNA:CR45631	11.2856	2.88969	0.835895	-3.45701	0.000546211	0.00312449	30.8327	15.9879	3.39543	2.62128	3.59082
FBgn0035710	SP1173	21.9544	2.88713	0.621607	-4.64462	3.40696e-06	3.66761e-05	34.46	56.5727	4.24429	6.11632	8.37859
FBgn0004885	tok	32.3629	2.88173	0.659816	-4.36747	1.25692e-05	0.000115812	57.1311	77.48	2.54657	17.4752	7.18165
FBgn0264382	lncRNA:CR43834	877.706	2.87763	0.165998	-17.3354	2.54509e-67	2.72611e-64	1781.04	1859.52	196.935	235.041	315.993
FBgn0065064	snoRNA:Psi28S-291	37.6882	2.74613	0.810016	-3.39021	0.000698382	0.00383618	12.6958	141.432	12.7329	9.61135	11.9694
FBgn0033188	Drat	104.051	2.70673	0.377122	-7.17734	7.10786e-13	2.5918e-11	224.897	198.004	16.9771	48.0568	32.3174
FBgn0030319	CG2533	33.4179	2.67511	0.491838	-5.439	5.35806e-08	8.61411e-07	57.1311	78.7099	13.5817	10.4851	7.18165
FBgn0031999	CG8419	24.2822	2.67477	0.579267	-4.6175	3.88389e-06	4.14459e-05	43.5285	55.3429	9.33743	9.61135	3.59082
FBgn0034085	Ptp52F	27.1044	2.66778	0.838404	-3.18197	0.00146277	0.00719957	57.1311	51.6533	1.69771	3.49504	21.5449
FBgn0038412	Zip89B	29.2755	2.62618	0.499353	-5.25918	1.44703e-07	2.10878e-06	67.1064	50.4235	9.33743	8.7376	10.7725
FBgn0286204	ich	34.9336	2.59406	0.564012	-4.5993	4.23906e-06	4.49514e-05	48.0627	92.2381	7.63971	18.3489	8.37859
FBgn0284247	ds	12.0583	2.58583	0.765516	-3.3779	0.000730429	0.00398166	26.2984	22.1371	5.09314	4.3688	2.39388
FBgn0028527	CG18507	159.07	2.58112	0.276117	-9.34795	8.93642e-21	7.29297e-19	322.836	311.15	37.3497	49.8043	74.2104
FBgn0032419	CG17217	14.7417	2.53064	0.695477	-3.63872	0.000273997	0.00172435	29.019	29.5162	3.39543	6.99008	4.78777
FBgn0083977	CG34141	22.8587	2.53039	0.591737	-4.27621	1.90103e-05	0.000167592	34.46	56.5727	6.79086	10.4851	5.98471
FBgn0262966	CG43277	26.4291	2.52918	0.598691	-4.22452	2.39455e-05	0.000204575	58.9448	45.5041	11.0351	3.49504	13.1664
FBgn0032598	ChLD3	34.7723	2.52886	0.469421	-5.38719	7.15695e-08	1.11708e-06	58.9448	78.7099	11.0351	9.61135	15.5602
FBgn0266412	lncRNA:CR45052	237.812	2.51006	0.316829	-7.92243	2.32922e-15	1.1672e-13	588.541	350.505	66.2109	62.9107	120.891
FBgn0041721	snRNA:U12	52.2262	2.4894	0.400676	-6.21299	5.19859e-10	1.22381e-08	87.0569	119.295	14.4306	23.5915	16.7572
FBgn0036323	CG14118	51.3534	2.47112	0.496321	-4.97887	6.39564e-07	8.03582e-06	88.8706	113.145	7.63971	27.9603	19.1511
FBgn0030798	CG13003	25.375	2.47044	0.607671	-4.06543	4.79431e-05	0.000376903	38.9942	60.2622	5.942	6.11632	15.5602
FBgn0010388	Dro	42.4886	2.42686	0.519354	-4.67284	2.97057e-06	3.25509e-05	83.4295	82.3994	5.942	22.7177	17.9541
FBgn0032522	CG16848	460.843	2.40837	0.17293	-13.9269	4.34808e-44	1.96098e-41	896.868	896.554	156.19	141.549	213.056
FBgn0038612	cona	14.0635	2.35407	0.763839	-3.08189	0.0020569	0.00960569	31.7395	22.1371	4.24429	2.62128	9.57553
FBgn0039006	Cyp6d4	238.756	2.34204	0.261222	-8.96568	3.08381e-19	2.2206e-17	483.347	435.364	74.6994	69.9008	130.467
FBgn0031811	CG13982	61.6138	2.32154	0.363179	-6.39227	1.63445e-10	4.15598e-09	137.84	98.3873	19.5237	23.5915	28.7266
FBgn0039941	CG17167	92.435	2.27569	0.290548	-7.83238	4.78708e-15	2.27892e-13	179.555	172.178	30.5589	33.2029	46.6807
FBgn0039530	Tusp	15.5375	2.24008	0.647424	-3.45999	0.000540199	0.00309216	30.8327	28.2864	6.79086	6.99008	4.78777
FBgn0013276	Hsp70Ab	47.5144	2.22014	0.494552	-4.4892	7.14902e-06	7.06574e-05	62.5722	118.065	23.768	23.5915	9.57553
FBgn0032235	CG5096	33.1158	2.16034	0.473863	-4.559	5.13984e-06	5.32566e-05	58.9448	65.1816	18.6749	9.61135	13.1664
FBgn0005626	ple	72.1115	2.12987	0.33149	-6.42512	1.31765e-10	3.42451e-09	145.095	124.214	36.5009	33.2029	21.5449
FBgn0035542	DOR	350.143	2.1298	0.199616	-10.6695	1.41402e-26	2.15789e-24	611.212	693.631	123.084	188.732	134.057
FBgn0069969	CG40498	16.4891	2.11501	0.663718	-3.18661	0.00143951	0.00709731	30.8327	30.746	6.79086	10.4851	3.59082
FBgn0260746	Ect3	959.187	2.11281	0.113195	-18.6652	9.50636e-78	2.0365e-74	1669.5	1890.27	419.335	373.969	442.868
FBgn0032668	CG17681	28.6023	2.09501	0.481654	-4.34962	1.36373e-05	0.000124982	51.69	54.113	14.4306	9.61135	13.1664
FBgn0030041	CG12116	167.532	2.05266	0.223041	-9.20308	3.47833e-20	2.70962e-18	328.277	285.323	68.7574	65.532	89.7706
FBgn0032178	Spn31A	27.5015	2.04933	0.489707	-4.18481	2.85405e-05	0.000237671	47.1558	54.113	14.4306	12.2326	9.57553
FBgn0085409	smal	24.3552	2.04208	0.54157	-3.77067	0.000162811	0.00110026	48.9695	40.5848	10.1863	14.8539	7.18165
FBgn0038348	AOX2	71.2125	2.01548	0.304123	-6.62719	3.42138e-11	9.7726e-10	126.051	134.053	31.4077	35.8241	28.7266
FBgn0003091	Pkc53E	127.266	2.00657	0.275185	-7.29171	3.06037e-13	1.17073e-11	232.152	231.21	42.4429	74.2696	56.2562
FBgn0052694	CG32694	1105.19	2.00578	0.124574	-16.1011	2.50694e-58	2.1482e-55	2006.84	2012.02	454.987	459.598	592.486
FBgn0032645	CG15142	47.4949	1.97542	0.36756	-5.37442	7.68303e-08	1.19052e-06	79.8022	92.2381	22.9191	20.9702	21.5449
FBgn0035539	slow	32.4584	1.96843	0.629651	-3.12622	0.0017707	0.00851468	42.6216	75.0203	6.79086	27.0865	10.7725
FBgn0000395	cv-2	39.1625	1.95657	0.457069	-4.28068	1.86321e-05	0.000164766	54.4106	87.3187	16.1283	23.5915	14.3633
FBgn0031975	Tg	65.8036	1.9378	0.396533	-4.88685	1.02464e-06	1.23489e-05	107.914	129.133	22.9191	46.3093	22.7419
FBgn0036732	Oatp74D	64.8068	1.93069	0.334365	-5.77419	7.73242e-09	1.46916e-07	115.169	116.835	22.9191	33.2029	35.9082
FBgn0015575	alpha-Est7	143.668	1.92782	0.213907	-9.01242	2.01563e-19	1.47623e-17	249.382	265.646	63.6643	69.027	70.6195
FBgn0030590	CG9518	89.5569	1.92667	0.341895	-5.63527	1.74783e-08	3.09446e-07	144.188	175.867	28.0123	41.0667	58.6501
FBgn0025702	Srpk79D	42.872	1.90197	0.447643	-4.24885	2.14868e-05	0.000185605	75.268	77.48	26.3146	11.3589	23.9388
FBgn0031900	CG13786	177.557	1.88937	0.24188	-7.8112	5.66474e-15	2.66709e-13	339.159	292.702	67.0597	107.472	81.392
FBgn0014464	Cp7Fa	6187.85	1.85679	0.560933	-3.31019	0.000932333	0.00488634	11522.3	10356.5	1960.01	4821.4	2278.98
FBgn0051721	Trim9	61.6413	1.85187	0.337231	-5.49138	3.98804e-08	6.57182e-07	99.7527	118.065	34.8031	24.4653	31.1205
FBgn0032084	CG13101	48.5932	1.85161	0.361003	-5.12907	2.91177e-07	3.95419e-06	80.709	91.0083	25.4657	21.844	23.9388
FBgn0014073	Tie	104.273	1.84957	0.256105	-7.22193	5.12561e-13	1.90136e-11	186.81	182.017	51.7803	57.6681	43.0899
FBgn0040297	Nhe2	542.139	1.84221	0.201173	-9.15733	5.31992e-20	4.03419e-18	866.942	1041.68	220.703	230.673	350.704
FBgn0037796	CG12814	1319.53	1.83074	0.3677	-4.97889	6.39484e-07	8.03582e-06	2871.06	1768.51	534.78	585.419	837.859
FBgn0032311	CG12517	49.8164	1.75944	0.533326	-3.29899	0.000970347	0.00505158	87.9638	83.6292	11.0351	20.9702	45.4838
FBgn0039114	Lsd-1	95.8779	1.73637	0.270733	-6.4136	1.42127e-10	3.64636e-09	158.697	172.178	43.2917	58.5419	46.6807
FBgn0029813	AgmNAT	30.4898	1.73374	0.465476	-3.72466	0.000195578	0.00128718	46.249	59.0324	13.5817	19.2227	14.3633
FBgn0011274	Dif	68.1777	1.69439	0.331754	-5.10735	3.26702e-07	4.39484e-06	132.399	99.6172	32.2566	32.3291	44.2868
FBgn0053653	Cadps	93.1922	1.65713	0.333268	-4.97235	6.61453e-07	8.29867e-06	163.232	151.27	33.1054	48.9305	69.4226
FBgn0000356	Cp16	2317.17	1.64763	0.469245	-3.51123	0.000446037	0.00262326	4509.73	3325.49	1000.8	1840.14	909.675
FBgn0259822	Ca-beta	296.726	1.64736	0.1732	-9.51131	1.88285e-21	1.68064e-19	486.068	515.304	145.155	146.792	190.314
FBgn0037130	Syn1	31.3659	1.64407	0.52283	-3.14455	0.00166343	0.00804854	60.7585	45.5041	13.5817	26.2128	10.7725
FBgn0039525	CG5646	74.3145	1.64066	0.305199	-5.3757	7.62867e-08	1.18424e-06	124.237	126.674	33.1054	48.0568	39.4991
FBgn0031313	CG5080	174.994	1.61621	0.251085	-6.4369	1.21938e-10	3.18563e-09	352.762	234.9	110.351	94.366	82.5889
FBgn0030234	CG15211	32.7957	1.60568	0.460709	-3.48523	0.000491712	0.00285466	62.5722	46.734	13.5817	18.3489	22.7419
FBgn0011695	EbpIII	37.991	1.59666	0.449313	-3.55356	0.000380054	0.00228379	77.0816	49.1937	18.6749	17.4752	27.5296
FBgn0000180	bib	193.281	1.56967	0.181379	-8.65409	4.96849e-18	3.25e-16	322.836	318.529	104.409	105.725	114.906
FBgn0262108	lncRNA:CR42861	191.169	1.53848	0.202907	-7.58217	3.39814e-14	1.47064e-12	337.346	291.472	95.072	107.472	124.482
FBgn0033799	GLaz	356.19	1.51402	0.18172	-8.33165	7.9722e-17	4.61579e-15	571.311	594.013	174.016	187.858	253.752
FBgn0030666	CG12708	417.951	1.49398	0.175592	-8.50826	1.76566e-17	1.09637e-15	723.661	640.747	218.156	295.331	211.859
FBgn0262167	ana1	1121.35	1.48717	0.0904716	-16.438	1.02242e-60	9.73454e-58	1747.49	1907.48	668.051	655.32	628.394
FBgn0030941	wgn	64.0135	1.47835	0.311748	-4.74215	2.11465e-06	2.39434e-05	95.2185	113.145	37.3497	38.4454	35.9082
FBgn0034532	CG13436	30.4924	1.47767	0.44836	-3.29573	0.000981663	0.0050981	46.249	52.8832	15.2794	20.0965	17.9541
FBgn0000320	eya	618.756	1.46851	0.130585	-11.2456	2.43553e-29	5.21752e-27	1047.4	956.817	378.59	317.175	393.794
FBgn0083987	snRNA:U11	44.8022	1.46745	0.434447	-3.37775	0.000730803	0.00398166	51.69	93.4679	22.0703	24.4653	32.3174
FBgn0034723	CG13506	78.1796	1.45895	0.336769	-4.33221	1.47622e-05	0.000134429	135.12	118.065	36.5009	62.9107	38.3021
FBgn0259229	CG42329	31.3059	1.45752	0.459051	-3.17507	0.00149798	0.00735598	44.4353	56.5727	14.4306	18.3489	22.7419
FBgn0034194	CG15611	115.324	1.45724	0.250503	-5.81724	5.9828e-09	1.16251e-07	180.462	193.085	61.9666	81.2596	59.8471
FBgn0030485	CG1998	132.641	1.44139	0.233707	-6.16753	6.93658e-10	1.59784e-08	213.108	215.222	83.188	88.2497	63.4379
FBgn0038740	CG4562	1638.21	1.39763	0.2834	-4.93165	8.15369e-07	1.00099e-05	2725.06	2492.89	836.973	845.799	1290.3
FBgn0051119	HDAC11	45.1881	1.39175	0.37628	-3.6987	0.000216706	0.00140148	70.7337	72.5606	22.9191	26.2128	33.5144
FBgn0250907	Cht10	171.939	1.39167	0.244819	-5.68451	1.31187e-08	2.39689e-07	245.754	300.081	84.8857	96.1135	132.86
FBgn0036463	Reck	78.1927	1.36087	0.30422	-4.4733	7.70218e-06	7.54286e-05	112.449	135.283	56.8734	48.0568	38.3021
FBgn0028743	Dhit	1738.88	1.30835	0.139234	-9.39678	5.62574e-21	4.63529e-19	2697.86	2713.03	912.521	1042.4	1328.6
FBgn0027654	jdp	81.6939	1.2954	0.28234	-4.58808	4.47333e-06	4.69755e-05	116.076	137.742	56.8734	46.3093	51.4685
FBgn0036294	CG10654	200.376	1.2832	0.269085	-4.76875	1.85373e-06	2.12166e-05	263.891	355.424	137.515	88.2497	156.799
FBgn0086711	mol	608.523	1.28271	0.138883	-9.23589	2.56148e-20	2.05134e-18	849.712	1031.84	353.125	381.833	426.111
FBgn0266084	Fhos	2245.58	1.28046	0.0844367	-15.1648	6.05286e-52	3.4578e-49	3267.35	3678.46	1498.23	1427.72	1356.13
FBgn0016694	Pdp1	297.321	1.27855	0.158802	-8.05122	8.19761e-16	4.33613e-14	425.309	493.166	187.597	178.247	202.283
FBgn0051674	CG31674	137.091	1.27238	0.215458	-5.90547	3.51649e-09	7.22609e-08	205.853	216.452	83.188	83.0072	96.9522
FBgn0038986	sit	126.433	1.26688	0.373365	-3.39315	0.000690945	0.00380264	226.711	162.339	112.049	43.688	87.3767
FBgn0032681	CG10283	1252.78	1.2577	0.128962	-9.75254	1.79914e-22	1.81375e-20	1870.82	1981.27	766.518	946.282	699.014
FBgn0050035	Tret1-1	502.054	1.25278	0.212387	-5.89858	3.66654e-09	7.49846e-08	699.176	839.982	230.889	341.64	398.581
FBgn0029835	CG5921	771.708	1.23312	0.149389	-8.25444	1.5261e-16	8.66038e-15	1010.22	1347.91	490.639	551.342	458.429
FBgn0027581	CG6191	136.088	1.23218	0.292273	-4.21584	2.48849e-05	0.000212177	175.928	238.589	64.5131	86.5022	114.906
FBgn0003089	pip	98.0224	1.21519	0.27729	-4.38239	1.17383e-05	0.00010969	172.3	125.444	66.2109	69.9008	56.2562
FBgn0051619	nolo	70.484	1.21465	0.344557	-3.52524	0.000423096	0.002509	87.0569	126.674	41.594	38.4454	58.6501
FBgn0031939	CG13796	280.594	1.20864	0.192613	-6.27497	3.49713e-10	8.32414e-09	383.595	467.34	204.575	151.16	196.298
FBgn0035770	pst	522.763	1.19777	0.17567	-6.81827	9.21439e-12	2.90287e-10	776.257	801.857	271.634	345.135	418.929
FBgn0011591	fng	322.176	1.19134	0.264633	-4.50187	6.73595e-06	6.72703e-05	448.887	525.142	202.028	293.583	141.239
FBgn0050345	CG30345	99.3405	1.18604	0.382121	-3.10382	0.00191037	0.00909948	159.604	138.972	33.9543	80.3859	83.7859
FBgn0031412	CG16995	57.9352	1.17434	0.360268	-3.25964	0.00111553	0.00570343	78.8953	94.6978	28.0123	40.1929	47.8777
FBgn0264955	asRNA:CR44124	63.9856	1.16169	0.314569	-3.69297	0.000221649	0.00142806	97.939	93.4679	36.5009	48.9305	43.0899
FBgn0027596	Kank	247.702	1.15206	0.161118	-7.15041	8.65221e-13	3.12367e-11	352.762	387.4	166.376	170.383	161.587
FBgn0031031	CG14218	70.638	1.14657	0.319102	-3.59313	0.000326726	0.00199694	104.287	105.766	35.652	52.4256	55.0593
FBgn0002926	ndl	7489.21	1.12763	0.316801	-3.55942	0.000371669	0.002246	10262.7	11941.8	5019.29	6558.44	3663.84
FBgn0034530	Rcd6	70.788	1.12718	0.308993	-3.64793	0.000264357	0.00167179	107.007	102.077	39.8963	46.3093	58.6501
FBgn0032727	CG10623	3328.11	1.10364	0.124191	-8.88662	6.29955e-19	4.46123e-17	5698.6	4099.06	2200.24	2379.25	2263.42
FBgn0033945	CG12868	189.814	1.09706	0.216094	-5.07677	3.83911e-07	5.0846e-06	254.823	302.541	106.107	137.18	148.421
FBgn0010383	Cyp18a1	1313.7	1.09224	0.103967	-10.5057	8.13443e-26	1.16173e-23	1900.74	1952.99	932.894	800.364	981.492
FBgn0031745	rau	197.327	1.09114	0.18668	-5.84498	5.06628e-09	1.01196e-07	267.519	312.38	132.422	145.044	129.27
FBgn0265991	Zasp52	5969.67	1.08109	0.100777	-10.7275	7.56117e-27	1.17803e-24	9342.29	8120.64	4498.94	3631.34	4255.13
FBgn0038720	CG6231	676.246	1.07328	0.163356	-6.57021	5.02453e-11	1.38888e-09	1080.96	892.865	405.754	563.575	438.081
FBgn0032682	grnd	82.4084	1.05936	0.278374	-3.80552	0.000141506	0.000978665	116.076	122.984	51.7803	54.1731	67.0287
FBgn0087007	bbg	1640.19	1.05832	0.0855702	-12.3678	3.9036e-35	1.07903e-32	2458.45	2310.87	1189.25	1183.07	1059.29
FBgn0087002	apolpp	475.013	1.05577	0.202253	-5.22003	1.78897e-07	2.55069e-06	666.529	710.848	258.901	306.69	432.096
FBgn0265630	sno	1394.55	1.05246	0.110831	-9.49604	2.18025e-21	1.90639e-19	1814.59	2232.16	928.65	962.009	1035.35
FBgn0031540	Pif1	910.207	1.04019	0.104296	-9.97345	1.99187e-23	2.33812e-21	1231.49	1400.79	606.084	657.941	654.727
FBgn0004893	bowl	157.72	1.03806	0.219485	-4.72954	2.25034e-06	2.52728e-05	224.897	231.21	130.724	95.2398	106.528
FBgn0085484	Pdxk	522.38	1.03008	0.12569	-8.19537	2.49814e-16	1.37222e-14	768.096	737.905	343.787	405.424	356.689
FBgn0031741	CG11034	1208.23	1.02207	0.0891403	-11.4659	1.95749e-30	4.30095e-28	1664.06	1812.79	834.427	895.603	834.268
FBgn0003459	stwl	559.477	1.01369	0.181173	-5.59515	2.20428e-08	3.77016e-07	723.661	884.256	427.824	455.229	306.417
FBgn0023216	Parg	1209.06	1.01262	0.0986562	-10.2641	1.02241e-24	1.32743e-22	1708.49	1761.13	825.938	945.408	804.345
FBgn0025693	ZnT41F	213.445	1.01013	0.178381	-5.66274	1.48977e-08	2.71036e-07	305.606	305.001	146.852	139.802	169.966
FBgn0039430	CG5455	454.073	1.00472	0.202359	-4.96507	6.86778e-07	8.59125e-06	568.59	729.296	261.448	304.068	406.96
FBgn0250871	pot	55.5771	1.00334	0.324008	-3.09665	0.00195721	0.00925058	82.5227	76.2502	37.3497	41.0667	40.696

## Sheet: Upregulated-GO
source	term_name	term_id	adjusted_p_value	negative_log10_of_adjusted_p_value	term_size	query_size	intersection_size	effective_domain_size	intersections
GO:MF	secondary active transmembrane transporter activity	GO:0015291	0.00391459	2.40731	126	192	9	17807	FBGN0034247,FBGN0033443,FBGN0260964,FBGN0039941,FBGN0036732,FBGN0040297,FBGN0050035,FBGN0031939,FBGN0087002
GO:MF	cation transmembrane transporter activity	GO:0008324	0.019982	1.69936	367	192	14	17807	FBGN0002917,FBGN0034247,FBGN0033443,FBGN0260964,FBGN0038412,FBGN0039941,FBGN0040297,FBGN0259822,FBGN0039525,FBGN0000180,FBGN0050035,FBGN0031939,FBGN0087002,FBGN0025693
GO:MF	active ion transmembrane transporter activity	GO:0022853	0.0274543	1.56139	161	192	9	17807	FBGN0034247,FBGN0033443,FBGN0260964,FBGN0039941,FBGN0036732,FBGN0040297,FBGN0050035,FBGN0031939,FBGN0087002
GO:MF	solute:cation symporter activity	GO:0015294	0.0362002	1.44129	67	192	6	17807	FBGN0034247,FBGN0033443,FBGN0260964,FBGN0050035,FBGN0031939,FBGN0087002
GO:MF	inorganic cation transmembrane transporter activity	GO:0022890	0.0475208	1.32312	349	192	13	17807	FBGN0002917,FBGN0034247,FBGN0033443,FBGN0260964,FBGN0038412,FBGN0039941,FBGN0040297,FBGN0259822,FBGN0000180,FBGN0050035,FBGN0031939,FBGN0087002,FBGN0025693
GO:MF	tumor necrosis factor-activated receptor activity	GO:0005031	0.0498528	1.30231	2	192	2	17807	FBGN0030941,FBGN0032682
GO:MF	death receptor activity	GO:0005035	0.0498528	1.30231	2	192	2	17807	FBGN0030941,FBGN0032682
GO:BP	developmental process	GO:0032502	0.00880428	2.05531	3029	192	57	17807	FBGN0004034,FBGN0033728,FBGN0265002,FBGN0026077,FBGN0000357,FBGN0003382,FBGN0000355,FBGN0003149,FBGN0030438,FBGN0033598,FBGN0001323,FBGN0260964,FBGN0004885,FBGN0034085,FBGN0286204,FBGN0284247,FBGN0005626,FBGN0003091,FBGN0035539,FBGN0000395,FBGN0036732,FBGN0015575,FBGN0030590,FBGN0014464,FBGN0051721,FBGN0014073,FBGN0040297,FBGN0032311,FBGN0011274,FBGN0000356,FBGN0259822,FBGN0037130,FBGN0011695,FBG…
GO:BP	anatomical structure development	GO:0048856	0.00913709	2.03919	2884	192	55	17807	FBGN0004034,FBGN0033728,FBGN0265002,FBGN0026077,FBGN0000357,FBGN0003382,FBGN0000355,FBGN0003149,FBGN0030438,FBGN0033598,FBGN0001323,FBGN0260964,FBGN0004885,FBGN0034085,FBGN0286204,FBGN0284247,FBGN0005626,FBGN0035539,FBGN0000395,FBGN0036732,FBGN0015575,FBGN0030590,FBGN0014464,FBGN0051721,FBGN0014073,FBGN0040297,FBGN0032311,FBGN0011274,FBGN0000356,FBGN0259822,FBGN0037130,FBGN0011695,FBGN0000180,FBG…
GO:BP	response to stimulus	GO:0050896	0.01131	1.94654	3129	192	58	17807	FBGN0028400,FBGN0052581,FBGN0265002,FBGN0032685,FBGN0004910,FBGN0035452,FBGN0002917,FBGN0013275,FBGN0265052,FBGN0260964,FBGN0024944,FBGN0004885,FBGN0033188,FBGN0034085,FBGN0038412,FBGN0284247,FBGN0010388,FBGN0039530,FBGN0013276,FBGN0005626,FBGN0035542,FBGN0085409,FBGN0003091,FBGN0000395,FBGN0031975,FBGN0036732,FBGN0015575,FBGN0030590,FBGN0025702,FBGN0051721,FBGN0014073,FBGN0032311,FBGN0011274,FBG…
GO:BP	cellular response to chemical stimulus	GO:0070887	0.0144718	1.83948	522	192	18	17807	FBGN0028400,FBGN0052581,FBGN0032685,FBGN0013275,FBGN0265052,FBGN0024944,FBGN0004885,FBGN0033188,FBGN0013276,FBGN0035542,FBGN0000395,FBGN0036732,FBGN0033799,FBGN0030941,FBGN0010383,FBGN0031745,FBGN0032682,FBGN0085484
GO:BP	metamorphosis	GO:0007552	0.0170326	1.76872	478	192	17	17807	FBGN0003382,FBGN0004885,FBGN0034085,FBGN0284247,FBGN0035539,FBGN0000395,FBGN0011274,FBGN0011695,FBGN0000180,FBGN0000320,FBGN0266084,FBGN0027581,FBGN0011591,FBGN0010383,FBGN0265630,FBGN0004893,FBGN0250871
GO:BP	post-embryonic development	GO:0009791	0.0265257	1.57633	653	192	20	17807	FBGN0003382,FBGN0004885,FBGN0034085,FBGN0284247,FBGN0035539,FBGN0000395,FBGN0036732,FBGN0030590,FBGN0011274,FBGN0000180,FBGN0000320,FBGN0266084,FBGN0038986,FBGN0027581,FBGN0011591,FBGN0010383,FBGN0265630,FBGN0004893,FBGN0003459,FBGN0250871
GO:BP	cellular response to stimulus	GO:0051716	0.0312142	1.50565	2201	192	44	17807	FBGN0028400,FBGN0052581,FBGN0265002,FBGN0032685,FBGN0004910,FBGN0035452,FBGN0013275,FBGN0265052,FBGN0024944,FBGN0004885,FBGN0033188,FBGN0284247,FBGN0039530,FBGN0013276,FBGN0035542,FBGN0085409,FBGN0003091,FBGN0000395,FBGN0036732,FBGN0030590,FBGN0025702,FBGN0051721,FBGN0014073,FBGN0032311,FBGN0011274,FBGN0259822,FBGN0000180,FBGN0033799,FBGN0030941,FBGN0000320,FBGN0034194,FBGN0036463,FBGN0003089,FBG…
GO:BP	instar larval or pupal morphogenesis	GO:0048707	0.0312745	1.50481	451	192	16	17807	FBGN0003382,FBGN0004885,FBGN0034085,FBGN0284247,FBGN0035539,FBGN0000395,FBGN0011274,FBGN0000180,FBGN0000320,FBGN0266084,FBGN0027581,FBGN0011591,FBGN0010383,FBGN0265630,FBGN0004893,FBGN0250871
GO:BP	multicellular organism development	GO:0007275	0.0313185	1.5042	2562	192	49	17807	FBGN0004034,FBGN0033728,FBGN0265002,FBGN0026077,FBGN0000357,FBGN0003382,FBGN0000355,FBGN0033598,FBGN0001323,FBGN0260964,FBGN0004885,FBGN0034085,FBGN0286204,FBGN0284247,FBGN0005626,FBGN0035539,FBGN0000395,FBGN0036732,FBGN0015575,FBGN0030590,FBGN0051721,FBGN0014073,FBGN0040297,FBGN0011274,FBGN0000356,FBGN0259822,FBGN0037130,FBGN0011695,FBGN0000180,FBGN0033799,FBGN0262167,FBGN0030941,FBGN0000320,FBG…
GO:BP	instar larval or pupal development	GO:0002165	0.0420334	1.37641	566	192	18	17807	FBGN0003382,FBGN0004885,FBGN0034085,FBGN0284247,FBGN0035539,FBGN0000395,FBGN0030590,FBGN0011274,FBGN0000180,FBGN0000320,FBGN0266084,FBGN0038986,FBGN0027581,FBGN0011591,FBGN0010383,FBGN0265630,FBGN0004893,FBGN0250871
GO:BP	post-embryonic animal morphogenesis	GO:0009886	0.0450846	1.34597	465	192	16	17807	FBGN0003382,FBGN0004885,FBGN0034085,FBGN0284247,FBGN0035539,FBGN0000395,FBGN0011274,FBGN0000180,FBGN0000320,FBGN0266084,FBGN0027581,FBGN0011591,FBGN0010383,FBGN0265630,FBGN0004893,FBGN0250871
GO:CC	cell periphery	GO:0071944	3.857e-05	4.41375	1687	192	42	17807	FBGN0028400,FBGN0265002,FBGN0051928,FBGN0004910,FBGN0000357,FBGN0003382,FBGN0000355,FBGN0030438,FBGN0037427,FBGN0034247,FBGN0000024,FBGN0033443,FBGN0013275,FBGN0260964,FBGN0024944,FBGN0034085,FBGN0038412,FBGN0284247,FBGN0039941,FBGN0013276,FBGN0003091,FBGN0036732,FBGN0014464,FBGN0014073,FBGN0040297,FBGN0032311,FBGN0000356,FBGN0259822,FBGN0037130,FBGN0031313,FBGN0000180,FBGN0030941,FBGN0034723,FBG…
GO:CC	chorion	GO:0042600	4.96781e-05	4.30383	41	192	7	17807	FBGN0051928,FBGN0000357,FBGN0000355,FBGN0030438,FBGN0014464,FBGN0032311,FBGN0000356
GO:CC	external encapsulating structure	GO:0030312	0.000113011	3.94688	46	192	7	17807	FBGN0051928,FBGN0000357,FBGN0000355,FBGN0030438,FBGN0014464,FBGN0032311,FBGN0000356
GO:CC	membrane	GO:0016020	0.00042897	3.36757	4190	192	74	17807	FBGN0028400,FBGN0052581,FBGN0033519,FBGN0265002,FBGN0004910,FBGN0003382,FBGN0033524,FBGN0035452,FBGN0037427,FBGN0032082,FBGN0002917,FBGN0034247,FBGN0030617,FBGN0000024,FBGN0033443,FBGN0013275,FBGN0260964,FBGN0024944,FBGN0085400,FBGN0035710,FBGN0030319,FBGN0034085,FBGN0038412,FBGN0284247,FBGN0028527,FBGN0262966,FBGN0036323,FBGN0039006,FBGN0039941,FBGN0013276,FBGN0032235,FBGN0069969,FBGN0085409,FBG…
GO:CC	intrinsic component of membrane	GO:0031224	0.00225586	2.64669	3203	192	59	17807	FBGN0028400,FBGN0052581,FBGN0033519,FBGN0265002,FBGN0003382,FBGN0037427,FBGN0032082,FBGN0002917,FBGN0034247,FBGN0030617,FBGN0000024,FBGN0033443,FBGN0260964,FBGN0024944,FBGN0085400,FBGN0035710,FBGN0030319,FBGN0034085,FBGN0038412,FBGN0284247,FBGN0028527,FBGN0262966,FBGN0039941,FBGN0032235,FBGN0069969,FBGN0085409,FBGN0052694,FBGN0036732,FBGN0030590,FBGN0032084,FBGN0014073,FBGN0040297,FBGN0037796,FBG…
GO:CC	integral component of membrane	GO:0016021	0.00364946	2.43777	3177	192	58	17807	FBGN0028400,FBGN0052581,FBGN0033519,FBGN0265002,FBGN0003382,FBGN0037427,FBGN0032082,FBGN0002917,FBGN0034247,FBGN0030617,FBGN0033443,FBGN0260964,FBGN0024944,FBGN0085400,FBGN0035710,FBGN0030319,FBGN0034085,FBGN0038412,FBGN0284247,FBGN0028527,FBGN0262966,FBGN0039941,FBGN0032235,FBGN0069969,FBGN0085409,FBGN0052694,FBGN0036732,FBGN0030590,FBGN0032084,FBGN0014073,FBGN0040297,FBGN0037796,FBGN0032311,FBG…
GO:CC	plasma membrane	GO:0005886	0.00907912	2.04196	1542	192	34	17807	FBGN0028400,FBGN0265002,FBGN0004910,FBGN0037427,FBGN0034247,FBGN0000024,FBGN0033443,FBGN0013275,FBGN0260964,FBGN0024944,FBGN0034085,FBGN0038412,FBGN0284247,FBGN0039941,FBGN0013276,FBGN0003091,FBGN0036732,FBGN0014073,FBGN0040297,FBGN0259822,FBGN0037130,FBGN0031313,FBGN0000180,FBGN0030941,FBGN0034723,FBGN0036463,FBGN0086711,FBGN0050035,FBGN0029835,FBGN0031939,FBGN0050345,FBGN0265991,FBGN0032682,FBG…
GO:CC	cellular anatomical entity	GO:0110165	0.0276545	1.55823	10020	192	133	17807	FBGN0028400,FBGN0052581,FBGN0004034,FBGN0033728,FBGN0033519,FBGN0265002,FBGN0030562,FBGN0052499,FBGN0051928,FBGN0026077,FBGN0004910,FBGN0000357,FBGN0259226,FBGN0032405,FBGN0003382,FBGN0033524,FBGN0032891,FBGN0000355,FBGN0003149,FBGN0030438,FBGN0035452,FBGN0037427,FBGN0032082,FBGN0038001,FBGN0002917,FBGN0034247,FBGN0033598,FBGN0038339,FBGN0030617,FBGN0000024,FBGN0033443,FBGN0013275,FBGN0265052,FBG…
