# Supplementary material for: Nuclear receptor Ftz-f1 promotes follicle maturation and ovulation partly via bHLH/PAS transcription factor Sim
Source: eLife. 2020 Apr 27;9:e54568. doi: 10.7554/eLife.54568 (PMC7239656; doi:10.7554/eLife.54568)
Supplement: Supplementary file 2. [file elife-54568-supp2.xlsx]

## Sheet: Replicate 1
motif_num	motif_chrom	motif_start	motif_end	motif_length	motif_name	-10*log10pVal	motif_strand	log-odds_score	motif_location	gene_start	gene_end	gene_length	gene_strand	gene_ID	transcript_ID	distanceToTSS	gene_sympol	gene_name
1	chrX	8473762	8473771	10	1-CAAGGTCARV-1-chrX	34	+	296.311	Promoter (<=1kb)	8473837	8476071	2235	1	FBgn0014465	FBtr0071201	-66	Cp7Fb	Chorion protein b at 7F
2	chrX	8473695	8473704	10	1-CAAGGTCARV-2-chrX	33.2	+	244.173	Promoter (<=1kb)	8473837	8476071	2235	1	FBgn0014465	FBtr0071201	-133	Cp7Fb	Chorion protein b at 7F
3	chrX	7873929	7873938	10	1-CAAGGTCARV-1-chrX	36.6	+	147.278	Promoter (<=1kb)	7874394	7876847	2454	1	FBgn0029966	FBtr0071087	-456	Ir7c	Ionotropic receptor 7c
4	chr3L	8731027	8731036	10	1-CAAGGTCARV-1-chr3L	39.4	-	132.801	Promoter (<=1kb)	8731944	8732599	656	1	FBgn0000356	FBtr0076574	-908	Cp16	Chorion protein 16
5	chr3R	8109204	8109213	10	1-CAAGGTCARV-1-chr3R	47.1	+	72.7535	Promoter (2-3kb)	8106488	8122294	15807	1	FBgn0243512	FBtr0339722	2716	puc	puckered
6	chr3L	15539978	15539987	10	1-CAAGGTCARV-1-chr3L	36.7	+	61.0539	Intron (FBtr0075557/FBgn0004396, intron 1 of 5)	15535395	15553214	17820	1	FBgn0004396	FBtr0075558	4583	CrebA	Cyclic-AMP response element binding protein A
7	chr3R	18385175	18385184	10	1-CAAGGTCARV-1-chr3R	36.2	-	54.1181	Promoter (<=1kb)	18381580	18385072	3493	2	FBgn0038611	FBtr0083580	-103	CG14309	uncharacterized protein
8	chr2L	9503019	9503028	10	1-CAAGGTCARV-1-chr2L	60.4	-	51.522	Intron (FBtr0089853/FBgn0032120, intron 1 of 14)	9495474	9520696	25223	1	FBgn0032120	FBtr0301065	7545	CG33298	uncharacterized protein
9	chr3R	13014916	13014925	10	1-CAAGGTCARV-1-chr3R	48.2	+	51.0907	Promoter (2-3kb)	13017161	13021717	4557	1	FBgn0020496	FBtr0082701	-2236	CtBP	C-terminal Binding Protein
10	chr2L	10515076	10515085	10	1-CAAGGTCARV-1-chr2L	33.6	-	50.6264	Promoter (1-2kb)	10511253	10516668	5416	2	FBgn0267828	FBtr0347403	1583	Fatp1	Fatty acid transport protein 1
11	chr3L	17924429	17924438	10	1-CAAGGTCARV-1-chr3L	36	-	46.6659	Distal Intergenic	17934032	17935572	1541	1	FBgn0267794	FBtr0347291	-9594	NA	NA
12	chrX	5897991	5898000	10	1-CAAGGTCARV-2-chrX	33.8	+	44.8217	Promoter (1-2kb)	5882480	5899989	17510	2	FBgn0267228	FBtr0346401	1989	NA	NA
13	chr2R	16785931	16785940	10	1-CAAGGTCARV-1-chr2R	55.9	-	43.9176	Promoter (1-2kb)	16787175	16792472	5298	1	FBgn0034158	FBtr0087030	-1235	CG5522	uncharacterized protein
14	chrX	12756511	12756520	10	1-CAAGGTCARV-1-chrX	40.7	-	43.802	Downstream (<1kb)	12757036	12760617	3582	2	FBgn0020513	FBtr0333799	4097	Paics	PAICS bifunctional enzyme
15	chr3L	6264107	6264116	10	1-CAAGGTCARV-2-chr3L	33.5	-	38.7287	Promoter (<=1kb)	6263008	6263399	392	2	FBgn0265715	FBtr0340648	-708	NA	NA
16	chr3L	8682250	8682259	10	1-CAAGGTCARV-1-chr3L	37.7	-	37.3494	Distal Intergenic	8675955	8679253	3299	1	FBgn0001168	FBtr0076569	6295	h	hairy
17	chrX	1271219	1271228	10	1-CAAGGTCARV-1-chrX	33.1	+	31.8886	Intron (FBtr0070244/FBgn0028550, intron 1 of 4)	1242740	1275284	32545	2	FBgn0028550	FBtr0070244	4056	Atf3	Activating transcription factor 3
18	chr3R	15087391	15087400	10	1-CAAGGTCARV-1-chr3R	50.3	+	30.5694	Intron (FBtr0344380/FBgn0038286, intron 1 of 4)	15078530	15079285	756	2	FBgn0038285	FBtr0083042	-8106	CG6974	uncharacterized protein
19	chr2L	18330422	18330431	10	1-CAAGGTCARV-1-chr2L	43.3	-	30.4835	Intron (FBtr0112804/FBgn0000636, intron 1 of 4)	18320102	18393441	73340	1	FBgn0000636	FBtr0344782	10320	Fas3	Fasciclin 3
20	chr2L	14246516	14246525	10	1-CAAGGTCARV-1-chr2L	45.3	+	29.845	Distal Intergenic	14241144	14241732	589	1	FBgn0265147	FBtr0336992	5372	NA	NA
21	chr3L	18793132	18793141	10	1-CAAGGTCARV-1-chr3L	42.6	+	28.6933	Intron (FBtr0075086/FBgn0001078, intron 2 of 9)	18751749	18801309	49561	2	FBgn0001078	FBtr0075086	8168	ftz-f1	ftz transcription factor 1
22	chr2R	23979877	23979886	10	1-CAAGGTCARV-1-chr2R	43.3	-	27.8755	Promoter (<=1kb)	23979895	23985177	5283	1	FBgn0005612	FBtr0072158	-9	Sox14	Sox box protein 14
23	chr2L	2130364	2130373	10	1-CAAGGTCARV-1-chr2L	35	-	27.3069	Promoter (<=1kb)	2130813	2137043	6231	1	FBgn0004507	FBtr0100485	-440	GlyP	Glycogen phosphorylase
24	chr3R	22368514	22368523	10	1-CAAGGTCARV-1-chr3R	54.8	+	25.9088	Promoter (<=1kb)	22369282	22372746	3465	1	FBgn0267385	FBtr0084214	-759	PyK	Pyruvate kinase
25	chr3L	6264182	6264191	10	1-CAAGGTCARV-1-chr3L	35.6	-	25.5177	Promoter (<=1kb)	6263008	6263399	392	2	FBgn0265715	FBtr0340648	-783	NA	NA
26	chr3R	13062291	13062300	10	1-CAAGGTCARV-1-chr3R	40.7	-	24.3526	Promoter (<=1kb)	13062522	13078124	15603	1	FBgn0004666	FBtr0334613	-222	sim	single-minded
27	chrX	13752842	13752851	10	1-CAAGGTCARV-1-chrX	47.8	+	22.587	Promoter (2-3kb)	13755322	13756013	692	1	FBgn0264381	FBtr0332276	-2471	NA	NA
28	chrX	6624233	6624242	10	1-CAAGGTCARV-1-chrX	60.4	+	22.2089	Intron (FBtr0070948/FBgn0029881, intron 2 of 9)	6633959	6636169	2211	1	FBgn0029880	FBtr0308654	-9717	CG14443	uncharacterized protein
29	chr2R	23871040	23871049	10	1-CAAGGTCARV-1-chr2R	52.7	+	22.1234	Promoter (<=1kb)	23870273	23877442	7170	1	FBgn0011236	FBtr0072129	767	ken	ken and barbie
30	chr2R	14343912	14343921	10	1-CAAGGTCARV-1-chr2R	47.6	-	21.5111	Promoter (1-2kb)	14342062	14351802	9741	1	FBgn0085408	FBtr0112616	1850	Shrm	Shroom
31	chr2R	24980808	24980817	10	1-CAAGGTCARV-1-chr2R	36.5	+	21.4992	Promoter (<=1kb)	24976605	24981158	4554	2	FBgn0010435	FBtr0343507	341	emp	epithelial membrane protein
32	chr3R	14024596	14024605	10	1-CAAGGTCARV-1-chr3R	33.1	+	21.3431	Promoter (1-2kb)	13967955	14025962	58008	2	FBgn0264493	FBtr0301634	1357	rdx	roadkill
33	chr3R	10888569	10888578	10	1-CAAGGTCARV-1-chr3R	35	+	20.9854	Promoter (<=1kb)	10887345	10889281	1937	2	FBgn0042094	FBtr0339379	703	Adk3	Adenylate kinase 3
34	chr2R	11665571	11665580	10	1-CAAGGTCARV-1-chr2R	34.1	-	20.8191	Promoter (<=1kb)	11665768	11674782	9015	1	FBgn0050035	FBtr0088073	-188	Tret1-1	Trehalose transporter 1-1
35	chrX	6624227	6624236	10	1-CAAGGTCARV-2-chrX	51.9	+	20.7943	Intron (FBtr0070948/FBgn0029881, intron 2 of 9)	6633959	6636169	2211	1	FBgn0029880	FBtr0308654	-9723	CG14443	uncharacterized protein
36	chr3R	15087346	15087355	10	1-CAAGGTCARV-2-chr3R	38	+	20.1908	Intron (FBtr0344380/FBgn0038286, intron 1 of 4)	15078530	15079285	756	2	FBgn0038285	FBtr0083042	-8061	CG6974	uncharacterized protein
37	chrX	11580731	11580740	10	1-CAAGGTCARV-1-chrX	37.9	+	20.1104	Promoter (<=1kb)	11580772	11585580	4809	1	FBgn0002948	FBtr0340297	-32	nod	no distributive disjunction
38	chr3R	13062312	13062321	10	1-CAAGGTCARV-2-chr3R	34.6	-	19.8267	Promoter (<=1kb)	13062522	13078124	15603	1	FBgn0004666	FBtr0334613	-201	sim	single-minded
39	chr3L	17968040	17968049	10	1-CAAGGTCARV-1-chr3L	34.1	+	19.2417	Intron (FBtr0306814/FBgn0000568, intron 5 of 7)	17952162	17971439	19278	2	FBgn0000568	FBtr0075150	3390	Eip75B	Ecdysone-induced protein 75B
40	chr3R	21186863	21186872	10	1-CAAGGTCARV-1-chr3R	54.8	-	18.5964	Promoter (1-2kb)	21188866	21212687	23822	1	FBgn0264357	FBtr0084021	-1994	SNF4Agamma	SNF4/AMP-activated protein kinase gamma subunit
41	chr2R	13839872	13839881	10	1-CAAGGTCARV-1-chr2R	47.8	+	18.2421	Promoter (<=1kb)	13840053	13841743	1691	1	FBgn0033875	FBtr0087638	-172	CG6357	uncharacterized protein
42	chr3R	20274554	20274563	10	1-CAAGGTCARV-1-chr3R	41	-	18.2009	Intron (FBtr0305029/FBgn0262582, intron 2 of 18)	20293044	20301377	8334	1	FBgn0262582	FBtr0334306	-18481	cic	capicua
43	chr2R	8671487	8671496	10	1-CAAGGTCARV-1-chr2R	49.3	+	17.9256	Promoter (<=1kb)	8672056	8682791	10736	1	FBgn0263120	FBtr0100429	-560	Acsl	Acyl-CoA synthetase long-chain
44	chr2R	18474897	18474906	10	1-CAAGGTCARV-1-chr2R	34.7	-	17.8764	Intron (FBtr0086719/FBgn0028496, intron 6 of 18)	18452737	18454462	1726	2	FBgn0034352	FBtr0086722	-20435	CG17669	uncharacterized protein
45	chr2R	6867967	6867976	10	1-CAAGGTCARV-1-chr2R	45	+	17.7047	Promoter (<=1kb)	6862260	6867795	5536	2	FBgn0265935	FBtr0336654	-172	coro	coro
46	chr3L	19907044	19907053	10	1-CAAGGTCARV-1-chr3L	47.1	+	17.4621	Promoter (2-3kb)	19909365	19910203	839	1	FBgn0264481	FBtr0332770	-2312	NA	NA
47	chrX	6356450	6356459	10	1-CAAGGTCARV-2-chrX	35.9	+	17.4312	Intron (FBtr0070906/FBgn0261955, intron 1 of 2)	6352282	6361323	9042	1	FBgn0261955	FBtr0070907	4168	kdn	knockdown
48	chr3R	10087347	10087356	10	1-CAAGGTCARV-2-chr3R	33.4	+	17.2531	Intron (FBtr0344594/FBgn0266414, intron 1 of 1)	10091126	10091217	92	1	FBgn0262378	FBtr0304217	-3770	NA	NA
49	chrX	16640914	16640923	10	1-CAAGGTCARV-1-chrX	36.6	+	16.4639	Promoter (<=1kb)	16640968	16649697	8730	1	FBgn0030766	FBtr0074314	-45	mthl1	methuselah-like 1
50	chr3L	1585230	1585239	10	1-CAAGGTCARV-1-chr3L	35.3	+	16.3862	Promoter (1-2kb)	1586694	1600845	14152	1	FBgn0035237	FBtr0347066	-1455	CG13917	uncharacterized protein
51	chr3L	20398711	20398720	10	1-CAAGGTCARV-1-chr3L	44.4	-	16.0879	Promoter (2-3kb)	20395394	20395851	458	2	FBgn0267237	FBtr0346407	-2860	NA	NA
52	chr3R	25659094	25659103	10	1-CAAGGTCARV-1-chr3R	46.6	+	15.8852	Promoter (1-2kb)	25657393	25658274	882	1	FBgn0267770	FBtr0347334	1701	NA	NA
53	chrX	5757026	5757035	10	1-CAAGGTCARV-1-chrX	42.7	+	14.4001	Promoter (<=1kb)	5755492	5756710	1219	2	FBgn0267084	FBtr0346080	-316	NA	NA
54	chrX	21076718	21076727	10	1-CAAGGTCARV-1-chrX	40.5	-	14.218	Intron (FBtr0077246/FBgn0031150, intron 6 of 6)	21062384	21067540	5157	2	FBgn0052512	FBtr0077262	-9178	CG32512	uncharacterized protein
55	chr3L	16806536	16806545	10	1-CAAGGTCARV-1-chr3L	52.7	-	13.6026	Promoter (1-2kb)	16787573	16807731	20159	2	FBgn0036663	FBtr0075344	1186	CG9674	uncharacterized protein
56	chr3L	17614306	17614315	10	1-CAAGGTCARV-1-chr3L	36.4	+	13.0958	Intron (FBtr0075202/FBgn0000567, intron 1 of 7)	17560158	17619325	59168	2	FBgn0000567	FBtr0075202	5010	Eip74EF	Ecdysone-induced protein 74EF
57	chr3R	17631543	17631552	10	1-CAAGGTCARV-1-chr3R	35.9	-	12.9938	Promoter (<=1kb)	17631679	17631750	72	1	FBgn0051573	FBtr0083472	-127	NA	NA
58	chrX	14762804	14762813	10	1-CAAGGTCARV-1-chrX	49.3	-	12.1913	Promoter (2-3kb)	14757531	14765787	8257	2	FBgn0030576	FBtr0073939	2974	CG15890	uncharacterized protein
59	chr2R	14123216	14123225	10	1-CAAGGTCARV-1-chr2R	35.2	-	11.8711	Intron (FBtr0339764/FBgn0040752, intron 1 of 10)	14060456	14140902	80447	2	FBgn0040752	FBtr0339764	17677	Prosap	prosap
60	chr3R	25437497	25437506	10	1-CAAGGTCARV-2-chr3R	33.2	-	11.1049	Intron (FBtr0089982/FBgn0004509, intron 1 of 11)	25347431	25473058	125628	2	FBgn0004509	FBtr0089982	35552	Fur1	Furin 1
61	chr3R	23529012	23529021	10	1-CAAGGTCARV-1-chr3R	39.2	+	10.5303	Promoter (<=1kb)	23522703	23528984	6282	2	FBgn0039084	FBtr0084423	-28	CG10175	uncharacterized protein
62	chr3R	17701997	17702006	10	1-CAAGGTCARV-1-chr3R	39.7	+	10.503	Promoter (1-2kb)	17700741	17701873	1133	1	FBgn0267703	FBtr0347243	1256	NA	NA
63	chrX	6356464	6356473	10	1-CAAGGTCARV-1-chrX	37.5	-	9.90239	Intron (FBtr0070906/FBgn0261955, intron 1 of 2)	6352282	6361323	9042	1	FBgn0261955	FBtr0070907	4182	kdn	knockdown
64	chr3R	31707414	31707423	10	1-CAAGGTCARV-1-chr3R	33.6	-	9.16076	Promoter (<=1kb)	31707870	31708340	471	2	FBgn0261583	FBtr0302894	917	CG42693	uncharacterized protein
65	chr2R	17766458	17766467	10	1-CAAGGTCARV-1-chr2R	42.9	+	9.03191	Promoter (<=1kb)	17766393	17766460	68	2	FBgn0263629	FBtr0309601	0	NA	NA
66	chrX	7705536	7705545	10	1-CAAGGTCARV-1-chrX	45.9	-	8.94225	Promoter (<=1kb)	7683458	7704963	21506	2	FBgn0029504	FBtr0112946	-573	CHES-1-like	Checkpoint suppressor 1-like
67	chr3L	18057163	18057172	10	1-CAAGGTCARV-2-chr3L	41.4	+	8.72605	Promoter (2-3kb)	17953358	18059598	106241	2	FBgn0000568	FBtr0075148	2426	Eip75B	Ecdysone-induced protein 75B
68	chr3R	20574111	20574120	10	1-CAAGGTCARV-1-chr3R	36.3	-	7.99912	Promoter (<=1kb)	20574906	20575043	138	1	FBgn0083039	FBtr0113583	-786	NA	NA
69	chr2L	21095768	21095777	10	1-CAAGGTCARV-1-chr2L	44.9	+	7.74433	Promoter (1-2kb)	21096922	21098932	2011	1	FBgn0083972	FBtr0110944	-1145	CG34136	uncharacterized protein
70	chr3R	9380123	9380132	10	1-CAAGGTCARV-1-chr3R	41.6	-	7.37399	Intron (FBtr0082051/FBgn0000723, intron 3 of 12)	9367603	9374811	7209	2	FBgn0000723	FBtr0082053	-5312	FER	FER tyrosine kinase
71	chr3L	12390735	12390744	10	1-CAAGGTCARV-1-chr3L	34.3	-	7.0238	Promoter (<=1kb)	12368646	12391444	22799	2	FBgn0036279	FBtr0075987	700	Ncc69	sodium chloride cotransporter 69
72	chr3L	20386118	20386127	10	1-CAAGGTCARV-1-chr3L	36.2	+	6.15477	Promoter (<=1kb)	20386408	20391913	5506	1	FBgn0011205	FBtr0078187	-281	fbl	fumble
73	chr3R	19059797	19059806	10	1-CAAGGTCARV-2-chr3R	33.5	-	6.11059	Promoter (1-2kb)	19058020	19058519	500	1	FBgn0267708	FBtr0347247	1777	NA	NA
74	chrX	13117208	13117217	10	1-CAAGGTCARV-1-chrX	51.9	+	6.09578	Promoter (2-3kb)	13115131	13123066	7936	1	FBgn0250862	FBtr0340302	2077	CG42237	uncharacterized protein
75	chrX	13117180	13117189	10	1-CAAGGTCARV-2-chrX	39.8	-	5.61758	Promoter (2-3kb)	13115131	13123066	7936	1	FBgn0250862	FBtr0340302	2049	CG42237	uncharacterized protein
76	chrX	3694768	3694777	10	1-CAAGGTCARV-1-chrX	53.5	-	5.12935	Intron (FBtr0301821/FBgn0023215, intron 3 of 8)	3689363	3701672	12310	1	FBgn0023215	FBtr0343578	5405	Mnt	Mnt
77	chr3R	19059791	19059800	10	1-CAAGGTCARV-1-chr3R	50.7	-	5.10238	Promoter (1-2kb)	19058020	19058519	500	1	FBgn0267708	FBtr0347247	1771	NA	NA
78	chr2R	16389649	16389658	10	1-CAAGGTCARV-1-chr2R	51.9	-	4.67821	Intron (FBtr0290009/FBgn0264273, intron 1 of 15)	16386524	16431758	45235	1	FBgn0264273	FBtr0329991	3125	Sema2b	Semaphorin 2b
79	chr3R	25437561	25437570	10	1-CAAGGTCARV-1-chr3R	48	-	4.63814	Intron (FBtr0089982/FBgn0004509, intron 1 of 11)	25347431	25473058	125628	2	FBgn0004509	FBtr0089982	35488	Fur1	Furin 1
80	chr3R	24090367	24090376	10	1-CAAGGTCARV-1-chr3R	33.6	-	-1.15771	Intron (FBtr0084587/FBgn0053100, intron 2 of 3)	24101600	24105763	4164	2	FBgn0013343	FBtr0303161	15387	Syx1A	Syntaxin 1A
81	chr3L	8070794	8070803	10	1-CAAGGTCARV-1-chr3L	41.7	+	-2.01578	Promoter (<=1kb)	8070952	8108506	37555	1	FBgn0262579	FBtr0333948	-149	Ect4	Ectoderm-expressed 4
82	chrX	20506724	20506733	10	1-CAAGGTCARV-1-chrX	35.2	-	-2.07796	Intron (FBtr0301537/FBgn0031118, intron 2 of 14)	20469955	20510694	40740	2	FBgn0031118	FBtr0301537	3961	RhoGAP19D	Rho GTPase activating protein at 19D
83	chr3L	19858153	19858162	10	1-CAAGGTCARV-2-chr3L	34.7	+	-2.27152	Intron (FBtr0074885/FBgn0020389, intron 2 of 4)	19861458	19861869	412	1	FBgn0266982	FBtr0345884	-3296	NA	NA
84	chrX	14762920	14762929	10	1-CAAGGTCARV-2-chrX	35	-	-2.4464	Promoter (2-3kb)	14757531	14765787	8257	2	FBgn0030576	FBtr0073939	2858	CG15890	uncharacterized protein
85	chr3L	6437307	6437316	10	1-CAAGGTCARV-1-chr3L	34	-	-3.00662	Intron (FBtr0303270/FBgn0261801, intron 1 of 6)	6400590	6485964	85375	1	FBgn0261801	FBtr0303270	36717	CG42747	uncharacterized protein
86	chr3R	9878667	9878676	10	1-CAAGGTCARV-1-chr3R	33.3	+	-3.06589	Promoter (<=1kb)	9876998	9878498	1501	2	FBgn0266389	FBtr0344328	-169	NA	NA
87	chr3L	3060672	3060681	10	1-CAAGGTCARV-1-chr3L	48.2	+	-3.07183	Intron (FBtr0073004/FBgn0266918, intron 1 of 7)	3055079	3055842	764	1	FBgn0035393	FBtr0072990	5593	CG16753	uncharacterized protein
88	chr3L	21129990	21129999	10	1-CAAGGTCARV-1-chr3L	35.4	-	-3.20059	Promoter (1-2kb)	21075581	21131159	55579	2	FBgn0020294	FBtr0078324	1160	ko	knockout
89	chrX	21368500	21368509	10	1-CAAGGTCARV-1-chrX	47.4	-	-3.21573	Promoter (<=1kb)	21368614	21373145	4532	1	FBgn0024251	FBtr0331745	-105	bbx	bobby sox
90	chr2L	14246483	14246492	10	1-CAAGGTCARV-2-chr2L	33.1	+	-3.48734	Distal Intergenic	14241144	14241732	589	1	FBgn0265147	FBtr0336992	5339	NA	NA
91	chr3L	17615432	17615441	10	1-CAAGGTCARV-2-chr3L	33.8	-	-3.69282	Intron (FBtr0075202/FBgn0000567, intron 1 of 7)	17560158	17619325	59168	2	FBgn0000567	FBtr0075202	3884	Eip74EF	Ecdysone-induced protein 74EF
92	chr3L	17964163	17964172	10	1-CAAGGTCARV-1-chr3L	39.8	-	-3.70582	Promoter (2-3kb)	17953358	17961814	8457	2	FBgn0000568	FBtr0075151	-2349	Eip75B	Ecdysone-induced protein 75B
93	chrX	3778301	3778310	10	1-CAAGGTCARV-1-chrX	42.3	-	-3.98174	Promoter (<=1kb)	3777382	3777505	124	1	FBgn0263532	FBtr0309620	919	NA	NA
94	chr2L	14599602	14599611	10	1-CAAGGTCARV-1-chr2L	33.9	-	-4.27259	Promoter (<=1kb)	14599674	14599745	72	1	FBgn0028910	FBtr0080647	-63	NA	NA
95	chr3L	1032328	1032337	10	1-CAAGGTCARV-1-chr3L	48.2	+	-4.3218	Promoter (2-3kb)	1034697	1036298	1602	1	FBgn0035181	FBtr0072621	-2360	CG9205	uncharacterized protein
96	chrX	11514185	11514194	10	1-CAAGGTCARV-1-chrX	35.8	+	-4.41321	Intron (FBtr0301020/FBgn0052666, intron 2 of 5)	11493819	11555045	61227	1	FBgn0052666	FBtr0340295	20366	Drak	Death-associated protein kinase related
97	chr2R	6133215	6133224	10	1-CAAGGTCARV-2-chr2R	33.9	+	-4.45861	Promoter (1-2kb)	6092277	6131922	39646	2	FBgn0000546	FBtr0086011	-1293	EcR	Ecdysone receptor
98	chrX	21368494	21368503	10	1-CAAGGTCARV-2-chrX	33.8	-	-4.61104	Promoter (<=1kb)	21368614	21373145	4532	1	FBgn0024251	FBtr0331745	-111	bbx	bobby sox
99	chr3L	20123230	20123239	10	1-CAAGGTCARV-1-chr3L	49.7	+	-4.79336	Downstream (1-2kb)	20124298	20126502	2205	2	FBgn0036939	FBtr0332700	3263	CG7365	uncharacterized protein
100	chr3L	18014441	18014450	10	1-CAAGGTCARV-1-chr3L	40.4	-	-4.86585	Intron (FBtr0306814/FBgn0000568, intron 3 of 7)	18002978	18003078	101	2	FBgn0086081	FBtr0114357	-11363	NA	NA
101	chrX	3174469	3174478	10	1-CAAGGTCARV-1-chrX	41.4	+	-5.86589	Promoter (<=1kb)	3173376	3174474	1099	2	FBgn0000644	FBtr0070542	0	Fcp3C	Follicle cell protein 3C
102	chr2R	10534035	10534044	10	1-CAAGGTCARV-2-chr2R	41.3	+	-6.28772	Promoter (<=1kb)	10504859	10534354	29496	2	FBgn0283521	FBtr0089343	310	lola	longitudinals lacking
103	chr3R	9424498	9424507	10	1-CAAGGTCARV-1-chr3R	36.1	-	-6.3427	Intron (FBtr0111027/FBgn0261552, intron 2 of 7)	9428561	9448649	20089	1	FBgn0261552	FBtr0111028	-4054	ps	pasilla
104	chr3L	1890476	1890485	10	1-CAAGGTCARV-1-chr3L	35.7	-	-6.49117	Promoter (<=1kb)	1889490	1891462	1973	1	FBgn0262624	FBtr0072837	986	Tmhs	Tetraspan membrane protein in hair cell stereocilia
105	chr2L	20084076	20084085	10	1-CAAGGTCARV-1-chr2L	43	-	-6.70666	Promoter (<=1kb)	20079270	20085070	5801	2	FBgn0263773	FBtr0310560	985	fok	fledgling of Klp38B
106	chr2L	5960499	5960508	10	1-CAAGGTCARV-1-chr2L	34.5	-	-6.82856	Promoter (<=1kb)	5959700	5960340	641	2	FBgn0003979	FBtr0079239	-159	Vm26Aa	Vitelline membrane 26Aa
107	chrX	2279088	2279097	10	1-CAAGGTCARV-1-chrX	42.7	-	-7.12665	3' UTR	2275950	2277781	1832	1	FBgn0085362	FBtr0112535	3138	Vml	Vitelline membrane-like
108	chr2L	10513964	10513973	10	1-CAAGGTCARV-1-chr2L	33.2	-	-7.57655	Promoter (2-3kb)	10511253	10516668	5416	2	FBgn0267828	FBtr0347403	2695	Fatp1	Fatty acid transport protein 1
109	chr3R	28691680	28691689	10	1-CAAGGTCARV-2-chr3R	41	+	-7.76072	Promoter (2-3kb)	28689671	28695939	6269	1	FBgn0039594	FBtr0305087	2009	snu	snustorr
110	chr3R	10089365	10089374	10	1-CAAGGTCARV-1-chr3R	51.9	-	-8.1588	Promoter (1-2kb)	10091126	10091217	92	1	FBgn0262378	FBtr0304217	-1752	NA	NA
111	chr2R	23566874	23566883	10	1-CAAGGTCARV-1-chr2R	35.7	-	-8.36004	Promoter (1-2kb)	23568058	23599526	31469	1	FBgn0015903	FBtr0072069	-1175	apt	apontic
112	chr2L	15911571	15911580	10	1-CAAGGTCARV-1-chr2L	35.7	-	-8.37821	Promoter (<=1kb)	15911691	15912062	372	1	FBgn0266161	FBtr0343723	-111	NA	NA
113	chr3R	21059185	21059194	10	1-CAAGGTCARV-1-chr3R	45	-	-8.53802	Promoter (1-2kb)	21051383	21060653	9271	2	FBgn0011672	FBtr0301477	1459	Mvl	Malvolio
114	chr2R	14344011	14344020	10	1-CAAGGTCARV-2-chr2R	33.4	-	-8.73962	Promoter (1-2kb)	14342062	14351802	9741	1	FBgn0085408	FBtr0112616	1949	Shrm	Shroom
115	chr3L	18057169	18057178	10	1-CAAGGTCARV-1-chr3L	43	+	-8.8719	Promoter (2-3kb)	17953358	18059598	106241	2	FBgn0000568	FBtr0075148	2420	Eip75B	Ecdysone-induced protein 75B
116	chrX	8888915	8888924	10	1-CAAGGTCARV-1-chrX	37.2	-	-9.03574	Promoter (2-3kb)	8873012	8891807	18796	2	FBgn0011661	FBtr0071269	2883	Moe	Moesin
117	chr3R	10087341	10087350	10	1-CAAGGTCARV-1-chr3R	51.9	+	-9.16024	Intron (FBtr0344594/FBgn0266414, intron 1 of 1)	10091126	10091217	92	1	FBgn0262378	FBtr0304217	-3776	NA	NA
118	chr2R	21527087	21527096	10	1-CAAGGTCARV-1-chr2R	33.2	+	-9.67398	Intron (FBtr0071653/FBgn0003731, intron 1 of 4)	21522420	21559977	37558	1	FBgn0003731	FBtr0071653	4667	Egfr	Epidermal growth factor receptor
119	chr3R	28691794	28691803	10	1-CAAGGTCARV-1-chr3R	45.3	+	-10.1536	Promoter (2-3kb)	28689671	28695939	6269	1	FBgn0039594	FBtr0305087	2123	snu	snustorr
120	chr3L	8696090	8696099	10	1-CAAGGTCARV-1-chr3L	48.2	+	-10.7696	Distal Intergenic	8692703	8693191	489	1	FBgn0265719	FBtr0340661	3387	NA	NA
121	chr2R	7911554	7911563	10	1-CAAGGTCARV-1-chr2R	48	+	-11.0453	Intron (FBtr0088844/FBgn0050377, intron 4 of 4)	7915027	7916478	1452	2	FBgn0033232	FBtr0088889	4915	CG12159	uncharacterized protein
122	chr2R	10534029	10534038	10	1-CAAGGTCARV-1-chr2R	60.4	+	-11.238	Promoter (<=1kb)	10504859	10534354	29496	2	FBgn0283521	FBtr0089343	316	lola	longitudinals lacking
123	chr2R	12754297	12754306	10	1-CAAGGTCARV-1-chr2R	46.8	+	-11.4111	Promoter (<=1kb)	12753219	12754895	1677	2	FBgn0026619	FBtr0087864	589	Taz	Tafazzin
124	chr3R	30386885	30386894	10	1-CAAGGTCARV-1-chr3R	43.3	-	-12.2909	Promoter (<=1kb)	30385802	30387600	1799	2	FBgn0015222	FBtr0306587	706	Fer1HCH	Ferritin 1 heavy chain homologue
125	chr3L	17581184	17581193	10	1-CAAGGTCARV-1-chr3L	38.3	-	-12.6932	Intron (FBtr0075202/FBgn0000567, intron 5 of 7)	17560158	17576626	16469	2	FBgn0000567	FBtr0075204	-4558	Eip74EF	Ecdysone-induced protein 74EF
126	chr3L	21034719	21034728	10	1-CAAGGTCARV-1-chr3L	34.5	-	-12.984	Promoter (<=1kb)	21034535	21075444	40910	1	FBgn0026179	FBtr0078289	184	siz	schizo
127	chr3L	10787075	10787084	10	1-CAAGGTCARV-1-chr3L	37.5	-	-13.3899	Promoter (2-3kb)	10789334	10789876	543	1	FBgn0265738	FBtr0340695	-2250	NA	NA
128	chr3L	15230973	15230982	10	1-CAAGGTCARV-1-chr3L	37.5	-	-14.1983	Distal Intergenic	15235619	15242832	7214	1	FBgn0029114	FBtr0075607	-4637	Tollo	tollo
129	chr2R	23791509	23791518	10	1-CAAGGTCARV-1-chr2R	35.6	-	-14.2494	Promoter (<=1kb)	23790614	23791227	614	2	FBgn0034904	FBtr0072245	-282	CG15800	uncharacterized protein
130	chr3L	19858108	19858117	10	1-CAAGGTCARV-1-chr3L	44	+	-14.3781	Intron (FBtr0074885/FBgn0020389, intron 2 of 4)	19861458	19861869	412	1	FBgn0266982	FBtr0345884	-3341	NA	NA
131	chrX	12006138	12006147	10	1-CAAGGTCARV-1-chrX	37.7	-	-14.6951	Promoter (1-2kb)	12007176	12009904	2729	1	FBgn0030360	FBtr0073574	-1029	CG1806	uncharacterized protein
132	chr2R	7911642	7911651	10	1-CAAGGTCARV-2-chr2R	34.1	-	-14.7245	Intron (FBtr0088844/FBgn0050377, intron 4 of 4)	7915027	7916478	1452	2	FBgn0033232	FBtr0088889	4827	CG12159	uncharacterized protein
133	chr2R	22902895	22902904	10	1-CAAGGTCARV-1-chr2R	49.3	+	-15.1114	Intron (FBtr0071942/FBgn0034797, intron 1 of 10)	22896174	22916719	20546	1	FBgn0034797	FBtr0304795	6721	nahoda	nahoda
134	chr3R	19150650	19150659	10	1-CAAGGTCARV-1-chr3R	35.7	-	-15.3531	Promoter (1-2kb)	19149122	19149557	436	1	FBgn0264916	FBtr0335018	1528	NA	NA
135	chr2L	16539449	16539458	10	1-CAAGGTCARV-1-chr2L	50.3	-	-15.638	Distal Intergenic	16542546	16543263	718	1	FBgn0051816	FBtr0080868	-3088	CG31816	uncharacterized protein
136	chr3L	17378735	17378744	10	1-CAAGGTCARV-1-chr3L	34.1	-	-16.3581	Promoter (<=1kb)	17367753	17379530	11778	2	FBgn0036715	FBtr0075239	786	Cad74A	Cadherin 74A
137	chr2L	19440142	19440151	10	1-CAAGGTCARV-1-chr2L	48.2	+	-16.4661	Promoter (<=1kb)	19435850	19440907	5058	2	FBgn0032783	FBtr0081208	756	CG10237	uncharacterized protein
138	chr3R	31709025	31709034	10	1-CAAGGTCARV-1-chr3R	43.8	+	-16.881	Promoter (<=1kb)	31709275	31709788	514	1	FBgn0054046	FBtr0308935	-241	NA	NA
139	chr3L	17958907	17958916	10	1-CAAGGTCARV-3-chr3L	36	+	-17.6457	Promoter (2-3kb)	17953358	17961814	8457	2	FBgn0000568	FBtr0075151	2898	Eip75B	Ecdysone-induced protein 75B
140	chrX	15132545	15132554	10	1-CAAGGTCARV-1-chrX	36	-	-17.8913	Intron (FBtr0100009/FBgn0260006, intron 2 of 8)	15125753	15137311	11559	1	FBgn0260006	FBtr0100009	6792	drd	drop dead
141	chr2L	9229834	9229843	10	1-CAAGGTCARV-1-chr2L	43.6	-	-18.4969	Intron (FBtr0303871/FBgn0041092, intron 2 of 13)	9236521	9236594	74	2	FBgn0051885	FBtr0079820	6751	NA	NA
142	chr3L	18788467	18788476	10	1-CAAGGTCARV-1-chr3L	36.5	+	-18.805	Intron (FBtr0075086/FBgn0001078, intron 2 of 9)	18751749	18801309	49561	2	FBgn0001078	FBtr0075086	12833	ftz-f1	ftz transcription factor 1
143	chr2R	13971183	13971192	10	1-CAAGGTCARV-1-chr2R	36	-	-18.9806	Promoter (<=1kb)	13969910	13971161	1252	2	FBgn0033887	FBtr0087609	-22	St4	Sulfotransferase 4
144	chr3R	4729982	4729991	10	1-CAAGGTCARV-2-chr3R	33.8	+	-19.1287	Promoter (1-2kb)	4719458	4731878	12421	2	FBgn0027570	FBtr0333922	1887	Nep2	Neprilysin 2
145	chr2L	9508400	9508409	10	1-CAAGGTCARV-1-chr2L	33.1	-	-20.1545	Intron (FBtr0089853/FBgn0032120, intron 2 of 14)	9521210	9540045	18836	1	FBgn0032123	FBtr0079827	-12801	Oatp30B	Organic anion transporting polypeptide 30B
146	chr3L	18762924	18762933	10	1-CAAGGTCARV-1-chr3L	35.5	+	-20.2008	Promoter (2-3kb)	18751749	18764956	13208	2	FBgn0001078	FBtr0075087	2023	ftz-f1	ftz transcription factor 1
147	chrX	2361273	2361282	10	1-CAAGGTCARV-1-chrX	48.2	+	-21.0299	Intron (FBtr0307284/FBgn0003159, intron 1 of 3)	2344949	2366356	21408	2	FBgn0003159	FBtr0307284	5074	CG2841	uncharacterized protein
148	chr2L	14666913	14666922	10	1-CAAGGTCARV-1-chr2L	38.9	+	-21.9661	Intron (FBtr0301496/FBgn0003016, intron 1 of 11)	14599196	14689340	90145	2	FBgn0003016	FBtr0301496	22418	osp	outspread
149	chr2L	5090269	5090278	10	1-CAAGGTCARV-1-chr2L	45.9	+	-23.0813	Intron (FBtr0079026/FBgn0031681, intron 2 of 9)	5072170	5093592	21423	2	FBgn0031681	FBtr0079026	3314	Pgant5	Polypeptide N-Acetylgalactosaminyltransferase 5
150	chr3L	17958740	17958749	10	1-CAAGGTCARV-1-chr3L	46.6	-	-23.2474	Intron (FBtr0306814/FBgn0000568, intron 6 of 7)	17953358	17961814	8457	2	FBgn0000568	FBtr0075151	3065	Eip75B	Ecdysone-induced protein 75B
151	chrX	12970352	12970361	10	1-CAAGGTCARV-1-chrX	51.9	+	-23.3496	Promoter (<=1kb)	12970711	12973967	3257	1	FBgn0030438	FBtr0305600	-350	CG15721	uncharacterized protein
152	chr2L	10220077	10220086	10	1-CAAGGTCARV-1-chr2L	47.1	-	-24.0464	Promoter (<=1kb)	10213812	10220952	7141	2	FBgn0024320	FBtr0303907	866	Npc1a	Niemann-Pick type C-1a
153	chr3R	4730048	4730057	10	1-CAAGGTCARV-1-chr3R	38	+	-25.5025	Promoter (1-2kb)	4719458	4731878	12421	2	FBgn0027570	FBtr0333922	1821	Nep2	Neprilysin 2
154	chr3L	17378676	17378685	10	1-CAAGGTCARV-2-chr3L	33.6	-	-26.9114	Promoter (<=1kb)	17367753	17379530	11778	2	FBgn0036715	FBtr0075239	845	Cad74A	Cadherin 74A
155	chr3L	17615591	17615600	10	1-CAAGGTCARV-1-chr3L	50.7	-	-28.7978	Intron (FBtr0075202/FBgn0000567, intron 1 of 7)	17560158	17619325	59168	2	FBgn0000567	FBtr0075202	3725	Eip74EF	Ecdysone-induced protein 74EF
156	chr3L	20398315	20398324	10	1-CAAGGTCARV-1-chr3L	42.2	-	-29.8715	Promoter (2-3kb)	20395394	20395851	458	2	FBgn0267237	FBtr0346407	-2464	NA	NA
157	chr2R	6133258	6133267	10	1-CAAGGTCARV-1-chr2R	36.8	-	-32.6779	Promoter (1-2kb)	6092277	6131922	39646	2	FBgn0000546	FBtr0086011	-1336	EcR	Ecdysone receptor
158	chr3L	17615492	17615501	10	1-CAAGGTCARV-3-chr3L	33.8	-	-33.0511	Intron (FBtr0075202/FBgn0000567, intron 1 of 7)	17560158	17619325	59168	2	FBgn0000567	FBtr0075202	3824	Eip74EF	Ecdysone-induced protein 74EF
159	chr2R	18828565	18828574	10	1-CAAGGTCARV-1-chr2R	55.9	+	-33.3244	Promoter (1-2kb)	18822188	18829699	7512	2	FBgn0034396	FBtr0303237	1125	CG15097	uncharacterized protein
160	chr3L	21036696	21036705	10	1-CAAGGTCARV-1-chr3L	33.8	-	-34.1534	Promoter (2-3kb)	21034535	21075444	40910	1	FBgn0026179	FBtr0078289	2161	siz	schizo
161	chr2L	7436760	7436769	10	1-CAAGGTCARV-1-chr2L	33	-	-34.943	Promoter (<=1kb)	7437492	7445269	7778	1	FBgn0031914	FBtr0079446	-723	CG5973	uncharacterized protein
162	chr3L	17958910	17958919	10	1-CAAGGTCARV-2-chr3L	45.3	-	-37.4532	Promoter (2-3kb)	17953358	17961814	8457	2	FBgn0000568	FBtr0075151	2895	Eip75B	Ecdysone-induced protein 75B
163	chr2L	3095749	3095758	10	1-CAAGGTCARV-1-chr2L	46.6	+	-37.8461	Promoter (1-2kb)	3069396	3094695	25300	2	FBgn0015600	FBtr0077664	-1054	toc	toucan
164	chr2R	16786131	16786140	10	1-CAAGGTCARV-2-chr2R	42.5	+	-46.5933	Promoter (1-2kb)	16787175	16792472	5298	1	FBgn0034158	FBtr0087030	-1035	CG5522	uncharacterized protein
165	chrX	5897862	5897871	10	1-CAAGGTCARV-1-chrX	41.9	-	-52.8023	Promoter (2-3kb)	5882480	5899989	17510	2	FBgn0267228	FBtr0346401	2118	NA	NA
166	chr3L	18782049	18782058	10	1-CAAGGTCARV-1-chr3L	36.6	+	-67.0438	Intron (FBtr0075086/FBgn0001078, intron 2 of 9)	18750607	18765744	15138	2	FBgn0001078	FBtr0347045	-16305	ftz-f1	ftz transcription factor 1
167	chr3L	8725185	8725194	10	1-CAAGGTCARV-1-chr3L	34.7	+	-69.5363	Promoter (<=1kb)	8725520	8725774	255	2	FBgn0264696	FBtr0333890	580	CG43965	uncharacterized protein

## Sheet: Replicate 2
motif_num	motif_chrom	motif_start	motif_end	motif_length	motif_name	-10*log10pVal	motif_strand	log-odds_score	motif_location	gene_start	gene_end	gene_length	gene_strand	gene_ID	transcript_ID	distanceToTSS	gene_sympol	gene_name
1	chrX	8473752	8473759	8	1-CAAGGTCR-1-chrX	34.9	-	165.057	Promoter (<=1kb)	8473837	8476071	2235	1	FBgn0014465	FBtr0071201	-78	Cp7Fb	Chorion protein b at 7F
2	chr2R	17392592	17392599	8	1-CAAGGTCR-1-chr2R	38.8	+	128.385	Promoter (<=1kb)	17392215	17392286	72	1	FBgn0011879	FBtr0086908	377	NA	NA
3	chrX	12006921	12006928	8	1-CAAGGTCR-1-chrX	40.3	-	117.241	Promoter (<=1kb)	12007176	12009904	2729	1	FBgn0030360	FBtr0073574	-248	CG1806	uncharacterized protein
4	chrX	7873929	7873936	8	1-CAAGGTCR-1-chrX	36.5	+	109.878	Promoter (<=1kb)	7874394	7876847	2454	1	FBgn0029966	FBtr0071087	-458	Ir7c	Ionotropic receptor 7c
5	chr2R	15613657	15613664	8	1-CAAGGTCR-1-chr2R	38	-	103.904	Promoter (<=1kb)	15613854	15650310	36457	1	FBgn0260429	FBtr0300853	-190	CG42524	uncharacterized protein
6	chrX	14952293	14952300	8	1-CAAGGTCR-1-chrX	42.7	+	101.507	Promoter (<=1kb)	14933670	14952009	18340	2	FBgn0027601	FBtr0303294	-284	pdgy	pudgy
7	chr2R	16786038	16786045	8	1-CAAGGTCR-2-chr2R	36.5	+	90.5779	Promoter (1-2kb)	16787175	16792472	5298	1	FBgn0034158	FBtr0087030	-1130	CG5522	uncharacterized protein
8	chr2L	5547167	5547174	8	1-CAAGGTCR-1-chr2L	39.2	+	88.9949	Promoter (<=1kb)	5547203	5549279	2077	1	FBgn0031717	FBtr0307062	-29	Oscillin	oscillin
9	chrX	3673050	3673057	8	1-CAAGGTCR-1-chrX	48.3	+	82.6198	Promoter (1-2kb)	3671801	3700780	28980	1	FBgn0023215	FBtr0301821	1249	Mnt	Mnt
10	chr2L	21250987	21250994	8	1-CAAGGTCR-1-chr2L	45.7	+	79.0095	Intron (FBtr0081478/FBgn0261239, intron 2 of 4)	21261168	21262287	1120	1	FBgn0021856	FBtr0081482	-10174	l(2)k14505	lethal (2) k14505
11	chr3R	18385177	18385184	8	1-CAAGGTCR-1-chr3R	43.8	-	77.4587	Promoter (<=1kb)	18381580	18385072	3493	2	FBgn0038611	FBtr0083580	-105	CG14309	uncharacterized protein
12	chrX	11580731	11580738	8	1-CAAGGTCR-1-chrX	39.8	+	75.0968	Promoter (<=1kb)	11580772	11585580	4809	1	FBgn0002948	FBtr0340297	-34	nod	no distributive disjunction
13	chr3L	21516763	21516770	8	1-CAAGGTCR-1-chr3L	39.2	-	71.709	Promoter (<=1kb)	21517187	21522156	4970	1	FBgn0037093	FBtr0332716	-417	Cdk12	Cyclin-dependent kinase 12
14	chr3R	18741426	18741433	8	1-CAAGGTCR-1-chr3R	33.2	-	70.6425	Promoter (1-2kb)	18733106	18740096	6991	2	FBgn0024329	FBtr0331353	-1330	Mekk1	Mekk1
15	chrX	13634260	13634267	8	1-CAAGGTCR-1-chrX	39.2	+	70.5521	Intron (FBtr0073808/FBgn0030505, intron 1 of 9)	13642175	13663657	21483	1	FBgn0030505	FBtr0345127	-7908	NFAT	NFAT nuclear factor
16	chr2L	21251021	21251028	8	1-CAAGGTCR-2-chr2L	41.8	+	70.3721	Intron (FBtr0081478/FBgn0261239, intron 2 of 4)	21261168	21262287	1120	1	FBgn0021856	FBtr0081482	-10140	l(2)k14505	lethal (2) k14505
17	chr2R	23871280	23871287	8	1-CAAGGTCR-1-chr2R	43.8	-	69.7778	Promoter (1-2kb)	23870273	23877442	7170	1	FBgn0011236	FBtr0072129	1007	ken	ken and barbie
18	chr2L	2904968	2904975	8	1-CAAGGTCR-1-chr2L	39.2	+	68.0619	Intron (FBtr0077632/FBgn0041111, intron 2 of 12)	2890171	2953077	62907	1	FBgn0041111	FBtr0290041	14797	lilli	lilliputian
19	chr2L	2908946	2908953	8	1-CAAGGTCR-1-chr2L	40.3	+	65.6571	Intron (FBtr0077632/FBgn0041111, intron 2 of 12)	2890171	2953077	62907	1	FBgn0041111	FBtr0290041	18775	lilli	lilliputian
20	chr3L	7435481	7435488	8	1-CAAGGTCR-1-chr3L	48.3	-	61.8338	Promoter (<=1kb)	7433892	7435190	1299	2	FBgn0014011	FBtr0076867	-291	Rac2	Rac2
21	chr3R	22368514	22368521	8	1-CAAGGTCR-1-chr3R	48.3	+	61.8271	Promoter (<=1kb)	22369282	22372746	3465	1	FBgn0267385	FBtr0084214	-761	PyK	Pyruvate kinase
22	chr2R	15379095	15379102	8	1-CAAGGTCR-1-chr2R	38	-	58.4292	Promoter (1-2kb)	15376619	15380614	3996	2	FBgn0000996	FBtr0339999	1512	dup	double parked
23	chr2R	23871040	23871047	8	1-CAAGGTCR-1-chr2R	48.3	+	58.0881	Promoter (<=1kb)	23870273	23877442	7170	1	FBgn0011236	FBtr0072129	767	ken	ken and barbie
24	chrX	12583189	12583196	8	1-CAAGGTCR-1-chrX	42.7	-	57.9158	Promoter (<=1kb)	12569169	12583193	14025	2	FBgn0030400	FBtr0331718	0	Pits	Protein interacting with Ttk69 and Sin3A
25	chr2L	14599585	14599592	8	1-CAAGGTCR-1-chr2L	35.6	+	57.7125	Promoter (<=1kb)	14599674	14599745	72	1	FBgn0028910	FBtr0080647	-82	NA	NA
26	chr3L	2574781	2574788	8	1-CAAGGTCR-1-chr3L	45.7	+	57.4373	Intron (FBtr0072956/FBgn0010909, intron 3 of 18)	2555774	2586254	30481	2	FBgn0010909	FBtr0333362	11466	msn	misshapen
27	chr3R	14017726	14017733	8	1-CAAGGTCR-1-chr3R	43.8	+	56.2923	Intron (FBtr0301634/FBgn0264493, intron 2 of 8)	13967955	14025962	58008	2	FBgn0264493	FBtr0301634	8229	rdx	roadkill
28	chr3L	4239866	4239873	8	1-CAAGGTCR-1-chr3L	40.3	+	54.9586	Promoter (<=1kb)	4240173	4242603	2431	1	FBgn0035515	FBtr0073225	-300	CG14997	uncharacterized protein
29	chr2R	6158898	6158905	8	1-CAAGGTCR-1-chr2R	43.8	-	52.7904	Promoter (<=1kb)	6158597	6159635	1039	1	FBgn0264505	FBtr0344875	301	NA	NA
30	chr2L	5742608	5742615	8	1-CAAGGTCR-1-chr2L	45.7	-	52.481	Promoter (1-2kb)	5733675	5741244	7570	2	FBgn0031734	FBtr0079165	-1364	CG11147	uncharacterized protein
31	chr3L	17590733	17590740	8	1-CAAGGTCR-1-chr3L	35.6	+	51.4926	Intron (FBtr0075202/FBgn0000567, intron 5 of 7)	17560158	17576626	16469	2	FBgn0000567	FBtr0075204	-14107	Eip74EF	Ecdysone-induced protein 74EF
32	chrX	12970458	12970465	8	1-CAAGGTCR-1-chrX	39.2	+	51.3564	Promoter (<=1kb)	12970711	12973967	3257	1	FBgn0030438	FBtr0305600	-246	CG15721	uncharacterized protein
33	chr3L	3344571	3344578	8	1-CAAGGTCR-1-chr3L	40.3	-	50.8364	Intron (FBtr0303857/FBgn0004167, intron 2 of 14)	3350108	3368133	18026	1	FBgn0004167	FBtr0300017	-5530	kst	karst
34	chrX	1271219	1271226	8	1-CAAGGTCR-1-chrX	40.3	+	49.2636	Intron (FBtr0070244/FBgn0028550, intron 1 of 4)	1242740	1275284	32545	2	FBgn0028550	FBtr0070244	4058	Atf3	Activating transcription factor 3
35	chr3L	18029757	18029764	8	1-CAAGGTCR-1-chr3L	41.8	+	48.5974	Intron (FBtr0306814/FBgn0000568, intron 3 of 7)	17953358	18026032	72675	2	FBgn0000568	FBtr0347013	-3725	Eip75B	Ecdysone-induced protein 75B
36	chrX	16832195	16832202	8	1-CAAGGTCR-1-chrX	41.2	+	48.0474	Intron (FBtr0112996/FBgn0030797, intron 1 of 2)	16826681	16835520	8840	2	FBgn0030797	FBtr0112996	3318	CG13004	uncharacterized protein
37	chrX	493206	493213	8	1-CAAGGTCR-1-chrX	42.7	+	47.3667	Promoter (<=1kb)	490787	493023	2237	2	FBgn0023537	FBtr0070093	-183	CG17896	uncharacterized protein
38	chr2L	72350	72357	8	1-CAAGGTCR-1-chr2L	35.8	-	46.4984	Promoter (<=1kb)	72387	76211	3825	1	FBgn0031213	FBtr0078101	-30	galectin	galectin
39	chr2L	9231209	9231216	8	1-CAAGGTCR-1-chr2L	45.7	-	46.338	Intron (FBtr0303871/FBgn0041092, intron 2 of 13)	9236521	9236594	74	2	FBgn0051885	FBtr0079820	5378	NA	NA
40	chrX	6624233	6624240	8	1-CAAGGTCR-1-chrX	48.3	+	44.5868	Intron (FBtr0070948/FBgn0029881, intron 2 of 9)	6633959	6636169	2211	1	FBgn0029880	FBtr0308654	-9719	CG14443	uncharacterized protein
41	chrX	18683189	18683196	8	1-CAAGGTCR-1-chrX	39.2	-	43.8678	Promoter (<=1kb)	18682143	18683303	1161	2	FBgn0265918	FBtr0342847	107	NA	NA
42	chr3L	9134532	9134539	8	1-CAAGGTCR-1-chr3L	48.3	-	43.5583	Promoter (<=1kb)	9134560	9135742	1183	1	FBgn0035964	FBtr0100532	-21	Dhpr	Dihydropteridine reductase
43	chr2R	6133171	6133178	8	1-CAAGGTCR-1-chr2R	38	-	43.2909	Promoter (1-2kb)	6092277	6131922	39646	2	FBgn0000546	FBtr0086011	-1249	EcR	Ecdysone receptor
44	chr2R	14343914	14343921	8	1-CAAGGTCR-1-chr2R	48.3	-	43.0669	Promoter (1-2kb)	14342062	14351802	9741	1	FBgn0085408	FBtr0112616	1852	Shrm	Shroom
45	chrX	13752842	13752849	8	1-CAAGGTCR-1-chrX	48.3	+	42.7414	Promoter (2-3kb)	13755322	13756013	692	1	FBgn0264381	FBtr0332276	-2473	NA	NA
46	chr2L	9508402	9508409	8	1-CAAGGTCR-1-chr2L	40.3	-	42.4512	Intron (FBtr0089853/FBgn0032120, intron 2 of 14)	9521210	9540045	18836	1	FBgn0032123	FBtr0079827	-12801	Oatp30B	Organic anion transporting polypeptide 30B
47	chr2R	17638245	17638252	8	1-CAAGGTCR-1-chr2R	38.3	-	42.1531	Promoter (<=1kb)	17604951	17639138	34188	2	FBgn0034253	FBtr0086895	886	CG10936	uncharacterized protein
48	chrX	20506726	20506733	8	1-CAAGGTCR-1-chrX	45.7	-	41.9701	Intron (FBtr0301537/FBgn0031118, intron 2 of 14)	20469955	20510694	40740	2	FBgn0031118	FBtr0301537	3961	RhoGAP19D	Rho GTPase activating protein at 19D
49	chr2R	6133221	6133228	8	1-CAAGGTCR-2-chr2R	37.5	+	40.8783	Promoter (1-2kb)	6092277	6131922	39646	2	FBgn0000546	FBtr0086011	-1299	EcR	Ecdysone receptor
50	chr2R	16785933	16785940	8	1-CAAGGTCR-1-chr2R	48.3	-	40.7788	Promoter (1-2kb)	16787175	16792472	5298	1	FBgn0034158	FBtr0087030	-1235	CG5522	uncharacterized protein
51	chrX	9344510	9344517	8	1-CAAGGTCR-1-chrX	43.8	+	40.2012	Intron (FBtr0112753/FBgn0085478, intron 2 of 10)	9324508	9356227	31720	2	FBgn0085478	FBtr0112753	11710	CG34449	uncharacterized protein
52	chr3L	17615434	17615441	8	1-CAAGGTCR-1-chr3L	42.7	-	40.1145	Intron (FBtr0075202/FBgn0000567, intron 1 of 7)	17560158	17619325	59168	2	FBgn0000567	FBtr0075202	3884	Eip74EF	Ecdysone-induced protein 74EF
53	chr3L	3149265	3149272	8	1-CAAGGTCR-1-chr3L	34.9	+	39.8692	Promoter (<=1kb)	3149133	3154934	5802	1	FBgn0263108	FBtr0307305	132	BtbVII	BTB-protein-VII
54	chr2R	7754701	7754708	8	1-CAAGGTCR-1-chr2R	41.8	-	39.8363	Intron (FBtr0088933/FBgn0050497, intron 1 of 1)	7737768	7758877	21110	2	FBgn0050497	FBtr0088933	4169	CG46385	uncharacterized protein
55	chrX	3778303	3778310	8	1-CAAGGTCR-1-chrX	45.7	-	39.657	Promoter (<=1kb)	3777382	3777505	124	1	FBgn0263532	FBtr0309620	921	NA	NA
56	chr2L	2130366	2130373	8	1-CAAGGTCR-1-chr2L	43.8	-	39.4441	Promoter (<=1kb)	2130813	2137043	6231	1	FBgn0004507	FBtr0100485	-440	GlyP	Glycogen phosphorylase
57	chr3R	10087347	10087354	8	1-CAAGGTCR-1-chr3R	40.3	+	39.2242	Intron (FBtr0344594/FBgn0266414, intron 1 of 1)	10091126	10091217	92	1	FBgn0262378	FBtr0304217	-3772	NA	NA
58	chrX	4703066	4703073	8	1-CAAGGTCR-1-chrX	48.3	+	39.2011	Promoter (<=1kb)	4702325	4705265	2941	1	FBgn0028325	FBtr0070711	741	Pdha	Pyruvate dehydrogenase E1 alpha subunit
59	chr2R	7989220	7989227	8	1-CAAGGTCR-1-chr2R	48.3	+	39.1835	Promoter (<=1kb)	7974115	7989714	15600	2	FBgn0033246	FBtr0339124	487	ACC	Acetyl-CoA carboxylase
60	chr2L	14409713	14409720	8	1-CAAGGTCR-1-chr2L	35.8	+	37.9265	Promoter (<=1kb)	14409755	14410045	291	1	FBgn0265946	FBtr0342910	-35	NA	NA
61	chr2L	18330424	18330431	8	1-CAAGGTCR-1-chr2L	38.3	-	37.7612	Intron (FBtr0112804/FBgn0000636, intron 1 of 4)	18320102	18393441	73340	1	FBgn0000636	FBtr0344782	10322	Fas3	Fasciclin 3
62	chr2R	13896165	13896172	8	1-CAAGGTCR-1-chr2R	39.2	+	37.6095	Promoter (1-2kb)	13864237	13897701	33465	2	FBgn0013733	FBtr0304851	1529	shot	short stop
63	chr3R	18381147	18381154	8	1-CAAGGTCR-2-chr3R	35.3	-	37.5939	Promoter (<=1kb)	18378124	18381178	3055	2	FBgn0038610	FBtr0083581	24	CG7675	uncharacterized protein
64	chrX	21368496	21368503	8	1-CAAGGTCR-1-chrX	42.7	-	37.4652	Promoter (<=1kb)	21368614	21373145	4532	1	FBgn0024251	FBtr0331745	-111	bbx	bobby sox
65	chrX	8476758	8476765	8	1-CAAGGTCR-1-chrX	34.9	-	37.1785	Promoter (<=1kb)	8477117	8478320	1204	1	FBgn0014466	FBtr0071202	-352	Cp7Fc	Chorion protein c at 7F
66	chr3L	3124762	3124769	8	1-CAAGGTCR-1-chr3L	36.2	+	37.035	Promoter (1-2kb)	3115748	3123165	7418	2	FBgn0026189	FBtr0333895	-1597	prominin-like	prominin-like
67	chr2L	21218842	21218849	8	1-CAAGGTCR-1-chr2L	40.3	+	36.4931	Promoter (<=1kb)	21216004	21218544	2541	2	FBgn0032934	FBtr0081488	-298	CG8679	uncharacterized protein
68	chr3L	18818592	18818599	8	1-CAAGGTCR-1-chr3L	34.7	+	36.4789	Promoter (2-3kb)	18802265	18820675	18411	2	FBgn0036814	FBtr0075084	2076	CG14073	uncharacterized protein
69	chrX	8482655	8482662	8	1-CAAGGTCR-1-chrX	39.2	+	36.4332	Promoter (<=1kb)	8481837	8483311	1475	1	FBgn0000360	FBtr0300448	818	Cp38	Chorion protein 38
70	chr3L	8682308	8682315	8	1-CAAGGTCR-1-chr3L	48.3	+	36.0365	Distal Intergenic	8675955	8679253	3299	1	FBgn0001168	FBtr0076569	6353	h	hairy
71	chr2R	23979879	23979886	8	1-CAAGGTCR-1-chr2R	38.3	-	35.9398	Promoter (<=1kb)	23979895	23985177	5283	1	FBgn0005612	FBtr0072158	-9	Sox14	Sox box protein 14
72	chr2R	13839872	13839879	8	1-CAAGGTCR-1-chr2R	48.3	+	35.9062	Promoter (<=1kb)	13840053	13841743	1691	1	FBgn0033875	FBtr0087638	-174	CG6357	uncharacterized protein
73	chr3L	21261170	21261177	8	1-CAAGGTCR-2-chr3L	34.7	+	35.6509	Intron (FBtr0306158/FBgn0004865, intron 4 of 6)	21258020	21258758	739	1	FBgn0262854	FBtr0306159	3150	CG43218	uncharacterized protein
74	chr3L	20398713	20398720	8	1-CAAGGTCR-1-chr3L	39.8	-	35.1849	Promoter (2-3kb)	20395394	20395851	458	2	FBgn0267237	FBtr0346407	-2862	NA	NA
75	chr3L	18137164	18137171	8	1-CAAGGTCR-1-chr3L	37.1	-	34.817	Promoter (<=1kb)	18135786	18136231	446	2	FBgn0265880	FBtr0342748	-933	NA	NA
76	chr3L	10766802	10766809	8	1-CAAGGTCR-2-chr3L	39.8	+	34.727	Distal Intergenic	10771925	10773399	1475	1	FBgn0262890	FBtr0306304	-5116	CG43245	uncharacterized protein
77	chr3L	21034689	21034696	8	1-CAAGGTCR-1-chr3L	43.8	+	34.5571	Promoter (<=1kb)	21034535	21075444	40910	1	FBgn0026179	FBtr0078289	154	siz	schizo
78	chrX	1619935	1619942	8	1-CAAGGTCR-1-chrX	34.9	-	34.4067	Promoter (1-2kb)	1552279	1618155	65877	2	FBgn0025390	FBtr0070284	-1780	Mur2B	Mucin related 2B
79	chr3L	11491535	11491542	8	1-CAAGGTCR-1-chr3L	42.7	+	34.3895	Promoter (2-3kb)	11493871	11499055	5185	1	FBgn0036165	FBtr0344910	-2329	chrb	charybde
80	chr3L	21011934	21011941	8	1-CAAGGTCR-1-chr3L	42.7	-	34.0047	Intron (FBtr0078329/FBgn0003415, intron 3 of 12)	21006379	21006520	142	2	FBgn0263486	FBtr0309785	-5414	NA	NA
81	chrX	11616601	11616608	8	1-CAAGGTCR-1-chrX	34.9	-	33.9736	Promoter (<=1kb)	11616124	11621280	5157	1	FBgn0002723	FBtr0343585	477	Met	Methoprene-tolerant
82	chrX	12724585	12724592	8	1-CAAGGTCR-1-chrX	35.8	-	33.4059	Intron (FBtr0333767/FBgn0265523, intron 2 of 9)	12717624	12718460	837	2	FBgn0264678	FBtr0333775	-6125	NA	NA
83	chr2R	14577137	14577144	8	1-CAAGGTCR-1-chr2R	36.5	-	33.2019	Promoter (1-2kb)	14570810	14575771	4962	2	FBgn0010397	FBtr0333166	-1366	LamC	Lamin C
84	chr3L	438579	438586	8	1-CAAGGTCR-1-chr3L	45.7	+	32.9845	Promoter (<=1kb)	434299	437774	3476	2	FBgn0001316	FBtr0343527	-805	klar	klarsicht
85	chr3R	30191255	30191262	8	1-CAAGGTCR-1-chr3R	38.8	+	32.9279	Promoter (<=1kb)	30185423	30191252	5830	2	FBgn0039754	FBtr0346162	-3	CG9747	uncharacterized protein
86	chr3R	9876790	9876797	8	1-CAAGGTCR-1-chr3R	38.8	-	32.6447	Promoter (1-2kb)	9876998	9878498	1501	2	FBgn0266389	FBtr0344328	1701	NA	NA
87	chr3R	10079457	10079464	8	1-CAAGGTCR-2-chr3R	40.3	+	32.3903	Distal Intergenic	10083381	10090525	7145	1	FBgn0266414	FBtr0344594	-3917	NA	NA
88	chr3L	4824647	4824654	8	1-CAAGGTCR-1-chr3L	45.7	+	31.9802	Promoter (1-2kb)	4807368	4825687	18320	2	FBgn0261797	FBtr0332745	1033	Dhc64C	Dynein heavy chain 64C
89	chr3L	9500127	9500134	8	1-CAAGGTCR-1-chr3L	39.2	+	31.8811	Promoter (2-3kb)	9494555	9497366	2812	2	FBgn0036007	FBtr0333865	-2761	path	pathetic
90	chr3R	31709025	31709032	8	1-CAAGGTCR-1-chr3R	48.3	+	31.8752	Promoter (<=1kb)	31709275	31709788	514	1	FBgn0054046	FBtr0308935	-243	NA	NA
91	chr3L	601608	601615	8	1-CAAGGTCR-1-chr3L	34.6	+	31.8615	Promoter (2-3kb)	599399	600914	1516	1	FBgn0267457	FBtr0346828	2209	NA	NA
92	chr2L	10514975	10514982	8	1-CAAGGTCR-2-chr2L	39.2	+	31.334	Promoter (1-2kb)	10511253	10516668	5416	2	FBgn0267828	FBtr0347403	1686	Fatp1	Fatty acid transport protein 1
93	chrX	20507720	20507727	8	1-CAAGGTCR-1-chrX	37.1	+	30.8578	Promoter (2-3kb)	20469955	20510694	40740	2	FBgn0031118	FBtr0301537	2967	RhoGAP19D	Rho GTPase activating protein at 19D
94	chr3R	29900113	29900120	8	1-CAAGGTCR-1-chr3R	41.2	-	30.6886	Intron (FBtr0085494/FBgn0051038, intron 3 of 3)	29903240	29903825	586	2	FBgn0039718	FBtr0085515	3705	CG15517	uncharacterized protein
95	chr2R	11665573	11665580	8	1-CAAGGTCR-1-chr2R	41.8	-	30.6726	Promoter (<=1kb)	11665768	11674782	9015	1	FBgn0050035	FBtr0088073	-188	Tret1-1	Trehalose transporter 1-1
96	chr2R	9958136	9958143	8	1-CAAGGTCR-1-chr2R	42.7	+	30.6725	Promoter (<=1kb)	9913496	9958858	45363	2	FBgn0011656	FBtr0088447	715	Mef2	Myocyte enhancer factor 2
97	chr2L	10515078	10515085	8	1-CAAGGTCR-1-chr2L	42.7	-	30.0953	Promoter (1-2kb)	10511253	10516668	5416	2	FBgn0267828	FBtr0347403	1583	Fatp1	Fatty acid transport protein 1
98	chr3L	17614306	17614313	8	1-CAAGGTCR-1-chr3L	43.8	+	29.9525	Intron (FBtr0075202/FBgn0000567, intron 1 of 7)	17560158	17619325	59168	2	FBgn0000567	FBtr0075202	5012	Eip74EF	Ecdysone-induced protein 74EF
99	chr3R	18456738	18456745	8	1-CAAGGTCR-1-chr3R	41.8	-	29.9509	Intron (FBtr0083644/FBgn0004652, intron 2 of 7)	18431233	18450254	19022	2	FBgn0004652	FBtr0083647	-6484	fru	fruitless
100	chr3R	16201510	16201517	8	1-CAAGGTCR-2-chr3R	37.1	-	29.9493	Promoter (1-2kb)	16198000	16203083	5084	2	FBgn0038407	FBtr0083278	1566	CG6126	uncharacterized protein
101	chr3L	14783027	14783034	8	1-CAAGGTCR-1-chr3L	41.8	+	29.771	Intron (FBtr0075699/FBgn0036449, intron 1 of 7)	14776496	14786412	9917	2	FBgn0036449	FBtr0075699	3378	bmm	brummer
102	chr2R	24980808	24980815	8	1-CAAGGTCR-1-chr2R	45.7	+	29.6839	Promoter (<=1kb)	24976605	24981158	4554	2	FBgn0010435	FBtr0343507	343	emp	epithelial membrane protein
103	chr2L	5742573	5742580	8	1-CAAGGTCR-2-chr2L	41.2	+	29.1307	Promoter (1-2kb)	5733675	5741244	7570	2	FBgn0031734	FBtr0079165	-1329	CG11147	uncharacterized protein
104	chr2L	5461287	5461294	8	1-CAAGGTCR-1-chr2L	38.8	+	28.6209	Promoter (<=1kb)	5461639	5466829	5191	1	FBgn0261963	FBtr0310358	-345	mid	midline
105	chr3L	1890356	1890363	8	1-CAAGGTCR-1-chr3L	42.7	-	28.4364	Promoter (<=1kb)	1889490	1891462	1973	1	FBgn0262624	FBtr0072837	866	Tmhs	Tetraspan membrane protein in hair cell stereocilia
106	chr3L	8024574	8024581	8	1-CAAGGTCR-1-chr3L	48.3	+	28.3504	Intron (FBtr0076755/FBgn0011817, intron 2 of 8)	8028546	8028618	73	2	FBgn0052370	FBtr0076762	4037	NA	NA
107	chrX	2790336	2790343	8	1-CAAGGTCR-1-chrX	45.7	+	28.3499	Promoter (<=1kb)	2782906	2790567	7662	2	FBgn0040384	FBtr0309881	224	CG32795	uncharacterized protein
108	chr2L	20382391	20382398	8	1-CAAGGTCR-1-chr2L	41.2	+	28.2534	Promoter (<=1kb)	20376981	20382356	5376	2	FBgn0032856	FBtr0081371	-35	CG16798	uncharacterized protein
109	chr3L	16710035	16710042	8	1-CAAGGTCR-1-chr3L	45.7	+	28.2352	Promoter (1-2kb)	16676406	16711677	35272	2	FBgn0063485	FBtr0100145	1635	Lasp	lasp
110	chrX	9585757	9585764	8	1-CAAGGTCR-1-chrX	43.8	-	27.8549	Promoter (<=1kb)	9585675	9589813	4139	1	FBgn0001186	FBtr0333335	82	Hex-A	Hexokinase A
111	chrX	3744661	3744668	8	1-CAAGGTCR-1-chrX	41.8	+	27.8044	Promoter (2-3kb)	3747163	3786636	39474	1	FBgn0283657	FBtr0112680	-2495	Tlk	Tousled-like kinase
112	chr3L	17049482	17049489	8	1-CAAGGTCR-1-chr3L	35.8	-	27.5018	Promoter (<=1kb)	17049512	17055454	5943	1	FBgn0036697	FBtr0075282	-23	rogdi	rogdi
113	chr2L	6087057	6087064	8	1-CAAGGTCR-1-chr2L	38.8	+	27.3129	Intron (FBtr0344437/FBgn0266450, intron 1 of 3)	6091412	6096498	5087	1	FBgn0266445	FBtr0344439	-4348	CG45075	uncharacterized protein
114	chr3L	18099174	18099181	8	1-CAAGGTCR-1-chr3L	39.2	-	27.0796	Intron (FBtr0075137/FBgn0036773, intron 2 of 6)	18088417	18106149	17733	2	FBgn0036773	FBtr0075137	6968	CG13698	uncharacterized protein
115	chrX	17532047	17532054	8	1-CAAGGTCR-1-chrX	40.3	-	27.0493	Promoter (<=1kb)	17456557	17531454	74898	2	FBgn0263706	FBtr0310338	-593	CG43658	uncharacterized protein
116	chr3L	17378678	17378685	8	1-CAAGGTCR-1-chr3L	42.7	-	26.9933	Promoter (<=1kb)	17367753	17379530	11778	2	FBgn0036715	FBtr0075239	845	Cad74A	Cadherin 74A
117	chr3R	10888569	10888576	8	1-CAAGGTCR-1-chr3R	43.8	+	26.9356	Promoter (<=1kb)	10887345	10889281	1937	2	FBgn0042094	FBtr0339379	705	Adk3	Adenylate kinase 3
118	chr3R	31213419	31213426	8	1-CAAGGTCR-1-chr3R	43.8	+	26.7097	Promoter (<=1kb)	31213458	31214784	1327	1	FBgn0039828	FBtr0085757	-32	CG1542	uncharacterized protein
119	chrX	17125425	17125432	8	1-CAAGGTCR-1-chrX	48.3	+	26.6149	Promoter (<=1kb)	17125463	17135988	10526	1	FBgn0260748	FBtr0302376	-31	CG5004	uncharacterized protein
120	chr3L	17924410	17924417	8	1-CAAGGTCR-1-chr3L	34.7	+	26.269	Distal Intergenic	17934032	17935572	1541	1	FBgn0267794	FBtr0347291	-9615	NA	NA
121	chr2R	14342484	14342491	8	1-CAAGGTCR-1-chr2R	39.2	-	26.0745	Promoter (<=1kb)	14342062	14351802	9741	1	FBgn0085408	FBtr0112616	422	Shrm	Shroom
122	chr3L	14274194	14274201	8	1-CAAGGTCR-1-chr3L	45.7	+	26.0365	Promoter (<=1kb)	14274343	14368639	94297	1	FBgn0001085	FBtr0075743	-142	fz	frizzled
123	chr3R	5322456	5322463	8	1-CAAGGTCR-1-chr3R	34.7	-	25.9732	Promoter (1-2kb)	5270116	5323847	53732	2	FBgn0013576	FBtr0078810	1384	mtd	mustard
124	chr2R	14574436	14574443	8	1-CAAGGTCR-1-chr2R	37.1	-	25.7901	Promoter (1-2kb)	14570810	14575771	4962	2	FBgn0010397	FBtr0087512	1328	LamC	Lamin C
125	chr3L	3069902	3069909	8	1-CAAGGTCR-1-chr3L	35.3	+	25.7467	Promoter (<=1kb)	3055908	3070839	14932	2	FBgn0266918	FBtr0073004	930	CG32486	uncharacterized protein
126	chr2L	4036043	4036050	8	1-CAAGGTCR-1-chr2L	38	-	25.6836	Intron (FBtr0077465/FBgn0000547, intron 2 of 8)	4031377	4115749	84373	1	FBgn0000547	FBtr0334265	4666	ed	echinoid
127	chr2R	6140716	6140723	8	1-CAAGGTCR-1-chr2R	45.7	-	25.4705	Promoter (1-2kb)	6142165	6142237	73	1	FBgn0011958	FBtr0085979	-1442	NA	NA
128	chr2L	18648754	18648761	8	1-CAAGGTCR-2-chr2L	35.5	-	25.3278	Intron (FBtr0081073/FBgn0032694, intron 2 of 3)	18651058	18653010	1953	2	FBgn0032693	FBtr0081077	4249	Cyp310a1	Cyp310a1
129	chr3L	1585230	1585237	8	1-CAAGGTCR-1-chr3L	39.8	+	25.1944	Promoter (1-2kb)	1586694	1600845	14152	1	FBgn0035237	FBtr0347066	-1457	CG13917	uncharacterized protein
130	chrX	3674177	3674184	8	1-CAAGGTCR-1-chrX	48.3	-	25.1323	Promoter (2-3kb)	3671801	3700780	28980	1	FBgn0023215	FBtr0301821	2376	Mnt	Mnt
131	chr3R	14730028	14730035	8	1-CAAGGTCR-2-chr3R	48.3	-	25.0692	Promoter (<=1kb)	14724760	14729078	4319	2	FBgn0038256	FBtr0333277	-950	CG7530	uncharacterized protein
132	chr3R	21186865	21186872	8	1-CAAGGTCR-1-chr3R	48.3	-	24.9768	Promoter (1-2kb)	21188866	21212687	23822	1	FBgn0264357	FBtr0084021	-1994	SNF4Agamma	SNF4/AMP-activated protein kinase gamma subunit
133	chrX	21366860	21366867	8	1-CAAGGTCR-1-chrX	48.3	-	24.9736	Promoter (1-2kb)	21368039	21373145	5107	1	FBgn0024251	FBtr0100599	-1172	bbx	bobby sox
134	chr3R	13062309	13062316	8	1-CAAGGTCR-1-chr3R	33.4	+	24.9233	Promoter (<=1kb)	13062522	13078124	15603	1	FBgn0004666	FBtr0334613	-206	sim	single-minded
135	chr3L	19906359	19906366	8	1-CAAGGTCR-1-chr3L	43.8	-	24.4919	Promoter (2-3kb)	19909365	19910203	839	1	FBgn0264481	FBtr0332770	-2999	NA	NA
136	chr2L	14207244	14207251	8	1-CAAGGTCR-1-chr2L	34.9	+	24.4816	Intron (FBtr0100447/FBgn0016930, intron 4 of 10)	14185662	14197567	11906	2	FBgn0016930	FBtr0336949	-9677	Dyrk2	Dual-specificity tyrosine phosphorylation-regulated kinase 2
137	chr3R	14729990	14729997	8	1-CAAGGTCR-1-chr3R	48.3	-	24.4038	Promoter (<=1kb)	14724760	14729078	4319	2	FBgn0038256	FBtr0333277	-912	CG7530	uncharacterized protein
138	chrX	16321303	16321310	8	1-CAAGGTCR-1-chrX	38.3	+	24.3663	Promoter (<=1kb)	16317673	16320370	2698	2	FBgn0004432	FBtr0074238	-933	Cyp1	Cyclophilin 1
139	chr2R	13897177	13897184	8	1-CAAGGTCR-1-chr2R	36.7	+	24.2176	Promoter (<=1kb)	13864237	13897701	33465	2	FBgn0013733	FBtr0304851	517	shot	short stop
140	chr2L	14246516	14246523	8	1-CAAGGTCR-1-chr2L	38.3	+	24.1155	Distal Intergenic	14241144	14241732	589	1	FBgn0265147	FBtr0336992	5372	NA	NA
141	chrX	16096333	16096340	8	1-CAAGGTCR-1-chrX	45.7	-	23.9431	Promoter (<=1kb)	16093059	16096663	3605	2	FBgn0259700	FBtr0299949	323	CG42354	uncharacterized protein
142	chr2L	16716723	16716730	8	1-CAAGGTCR-1-chr2L	38	-	23.6831	Promoter (<=1kb)	16704286	16716195	11910	2	FBgn0062978	FBtr0303445	-528	CG31808	uncharacterized protein
143	chr3L	17614036	17614043	8	1-CAAGGTCR-3-chr3L	38.3	-	23.6795	Intron (FBtr0075202/FBgn0000567, intron 1 of 7)	17560158	17619325	59168	2	FBgn0000567	FBtr0075202	5282	Eip74EF	Ecdysone-induced protein 74EF
144	chr2L	19472208	19472215	8	1-CAAGGTCR-1-chr2L	36.2	-	23.4128	Promoter (<=1kb)	19470844	19471627	784	2	FBgn0264391	FBtr0332319	-581	NA	NA
145	chr2L	5958887	5958894	8	1-CAAGGTCR-1-chr2L	43.8	+	23.2598	Promoter (<=1kb)	5958005	5958631	627	2	FBgn0086266	FBtr0079240	-256	Vm26Ac	Vitelline membrane 26Aac
146	chr3R	18381141	18381148	8	1-CAAGGTCR-1-chr3R	36.2	-	22.7706	Promoter (<=1kb)	18378124	18381178	3055	2	FBgn0038610	FBtr0083581	30	CG7675	uncharacterized protein
147	chr3R	4449345	4449352	8	1-CAAGGTCR-1-chr3R	35.3	+	22.5456	Promoter (1-2kb)	4441415	4450843	9429	2	FBgn0051522	FBtr0078941	1491	CG31522	uncharacterized protein
148	chr3L	21261108	21261115	8	1-CAAGGTCR-1-chr3L	35.6	+	22.4154	Intron (FBtr0306158/FBgn0004865, intron 4 of 6)	21258020	21258758	739	1	FBgn0262854	FBtr0306159	3088	CG43218	uncharacterized protein
149	chr3L	18795902	18795909	8	1-CAAGGTCR-2-chr3L	43.8	-	22.3951	Intron (FBtr0075086/FBgn0001078, intron 2 of 9)	18751749	18801309	49561	2	FBgn0001078	FBtr0075086	5400	ftz-f1	ftz transcription factor 1
150	chrX	9035368	9035375	8	1-CAAGGTCR-1-chrX	35.8	-	22.1142	Intron (FBtr0302905/FBgn0259734, intron 1 of 6)	9039675	9053319	13645	1	FBgn0259734	FBtr0300001	-4300	Nost	Nostrin
151	chr3R	14024596	14024603	8	1-CAAGGTCR-1-chr3R	36.5	+	22.1068	Promoter (1-2kb)	13967955	14025962	58008	2	FBgn0264493	FBtr0301634	1359	rdx	roadkill
152	chr2L	19472236	19472243	8	1-CAAGGTCR-2-chr2L	36.2	+	22.0831	Promoter (<=1kb)	19470844	19471627	784	2	FBgn0264391	FBtr0332319	-609	NA	NA
153	chr3R	14736980	14736987	8	1-CAAGGTCR-1-chr3R	33.1	+	21.9792	Intron (FBtr0336876/FBgn0011217, intron 2 of 4)	14732414	14740791	8378	2	FBgn0011217	FBtr0336876	3804	eff	effete
154	chrX	10877790	10877797	8	1-CAAGGTCR-1-chrX	48.3	-	21.9772	Promoter (<=1kb)	10870594	10877798	7205	2	FBgn0030245	FBtr0073407	1	CG1637	uncharacterized protein
155	chr2R	14139103	14139110	8	1-CAAGGTCR-1-chr2R	43.8	+	21.4679	Promoter (1-2kb)	14060456	14140902	80447	2	FBgn0040752	FBtr0339764	1792	Prosap	prosap
156	chrX	15710632	15710639	8	1-CAAGGTCR-1-chrX	34.7	+	21.4592	Promoter (<=1kb)	15710647	15712186	1540	1	FBgn0030673	FBtr0339683	-8	CG15601	uncharacterized protein
157	chr3L	21057564	21057571	8	1-CAAGGTCR-1-chr3L	41.8	-	21.45	Promoter (1-2kb)	21058832	21075444	16613	1	FBgn0026179	FBtr0078290	-1261	siz	schizo
158	chr2L	9507545	9507552	8	1-CAAGGTCR-1-chr2L	38	+	21.4118	Intron (FBtr0089853/FBgn0032120, intron 2 of 14)	9495474	9520696	25223	1	FBgn0032120	FBtr0301065	12071	CG33298	uncharacterized protein
159	chr2R	21201024	21201031	8	1-CAAGGTCR-1-chr2R	43.8	-	21.3835	Promoter (<=1kb)	21200483	21210821	10339	1	FBgn0265191	FBtr0339092	541	Gyg	Glycogenin
160	chrX	6549328	6549335	8	1-CAAGGTCR-2-chrX	33.9	-	21.2359	Intron (FBtr0112703/FBgn0085446, intron 2 of 3)	6546119	6589173	43055	1	FBgn0085446	FBtr0345070	3209	CG34417	uncharacterized protein
161	chr3R	25737873	25737880	8	1-CAAGGTCR-1-chr3R	42.7	+	21.1337	Promoter (<=1kb)	25738027	25738689	663	1	FBgn0267771	FBtr0347335	-147	NA	NA
162	chr2R	14123218	14123225	8	1-CAAGGTCR-1-chr2R	45.7	-	21.1252	Intron (FBtr0339764/FBgn0040752, intron 1 of 10)	14060456	14140902	80447	2	FBgn0040752	FBtr0339764	17677	Prosap	prosap
163	chr3R	28691794	28691801	8	1-CAAGGTCR-1-chr3R	38.3	+	21.0809	Promoter (2-3kb)	28689671	28695939	6269	1	FBgn0039594	FBtr0305087	2123	snu	snustorr
164	chr3L	3037319	3037326	8	1-CAAGGTCR-1-chr3L	45.7	+	21.0483	Promoter (1-2kb)	3038343	3040469	2127	1	FBgn0035388	FBtr0345029	-1017	CG2162	uncharacterized protein
165	chr2R	23386482	23386489	8	1-CAAGGTCR-1-chr2R	41.2	+	20.9765	Promoter (<=1kb)	23385464	23386463	1000	2	FBgn0250838	FBtr0072031	-19	roh	reduction of Rh1
166	chr3R	9424500	9424507	8	1-CAAGGTCR-1-chr3R	37.5	-	20.941	Intron (FBtr0111027/FBgn0261552, intron 2 of 7)	9428561	9448649	20089	1	FBgn0261552	FBtr0111028	-4054	ps	pasilla
167	chr3R	10093502	10093509	8	1-CAAGGTCR-1-chr3R	38.3	-	20.9333	Promoter (<=1kb)	10093761	10094625	865	1	FBgn0263413	FBtr0309196	-252	NA	NA
168	chr3L	11819635	11819642	8	1-CAAGGTCR-1-chr3L	45.7	-	20.8809	Promoter (<=1kb)	11816983	11819956	2974	2	FBgn0036211	FBtr0076079	314	CG5946	uncharacterized protein
169	chrX	1619355	1619362	8	1-CAAGGTCR-1-chrX	43.8	+	20.8532	Promoter (1-2kb)	1552279	1618155	65877	2	FBgn0025390	FBtr0070284	-1200	Mur2B	Mucin related 2B
170	chrX	22839858	22839865	8	1-CAAGGTCR-1-chrX	42.7	+	20.8439	Intron (FBtr0333177/FBgn0259677, intron 1 of 5)	22826162	22836259	10098	2	FBgn0000719	FBtr0333180	-3599	fog	folded gastrulation
171	chr3L	16806538	16806545	8	1-CAAGGTCR-1-chr3L	48.3	-	20.8251	Promoter (1-2kb)	16787573	16807731	20159	2	FBgn0036663	FBtr0075344	1186	CG9674	uncharacterized protein
172	chr2R	8149870	8149877	8	1-CAAGGTCR-1-chr2R	45.7	+	20.7666	Promoter (<=1kb)	8146918	8149435	2518	2	FBgn0010504	FBtr0088813	-435	kermit	kermit
173	chrX	2641712	2641719	8	1-CAAGGTCR-1-chrX	42.7	-	20.6113	Promoter (<=1kb)	2641189	2675602	34414	1	FBgn0003371	FBtr0301966	523	sgg	shaggy
174	chr3R	11221792	11221799	8	1-CAAGGTCR-1-chr3R	34.7	-	20.4824	Promoter (<=1kb)	11221894	11223043	1150	1	FBgn0020910	FBtr0082347	-95	RpL3	Ribosomal protein L3
175	chr3L	9358357	9358364	8	1-CAAGGTCR-1-chr3L	37.1	+	20.4079	Promoter (<=1kb)	9351457	9357883	6427	2	FBgn0035978	FBtr0076501	-474	UGP	UGP
176	chrX	8888917	8888924	8	1-CAAGGTCR-1-chrX	36	-	20.3981	Promoter (2-3kb)	8873012	8891807	18796	2	FBgn0011661	FBtr0071269	2883	Moe	Moesin
177	chr3R	8357268	8357275	8	1-CAAGGTCR-1-chr3R	37.8	+	20.0321	Promoter (<=1kb)	8357331	8359964	2634	1	FBgn0020249	FBtr0081845	-56	stck	steamer duck
178	chrX	3744801	3744808	8	1-CAAGGTCR-1-chrX	41.8	+	19.8693	Promoter (2-3kb)	3747163	3786636	39474	1	FBgn0283657	FBtr0112680	-2355	Tlk	Tousled-like kinase
179	chr3L	18144743	18144750	8	1-CAAGGTCR-1-chr3L	38.3	+	19.7816	Intron (FBtr0075126/FBgn0020300, intron 2 of 2)	18148923	18153627	4705	1	FBgn0036780	FBtr0075127	-4173	CG7330	uncharacterized protein
180	chr3L	18063304	18063311	8	1-CAAGGTCR-1-chr3L	34.7	-	19.7501	Promoter (1-2kb)	17950953	18064696	113744	2	FBgn0000568	FBtr0306814	1385	Eip75B	Ecdysone-induced protein 75B
181	chr2R	6145950	6145957	8	1-CAAGGTCR-1-chr2R	42.7	+	19.6632	Intron (FBtr0086010/FBgn0000546, intron 4 of 7)	6142372	6142444	73	2	FBgn0011891	FBtr0086017	-3506	NA	NA
182	chr2R	7913604	7913611	8	1-CAAGGTCR-1-chr2R	39.2	+	19.6396	Promoter (2-3kb)	7915027	7916478	1452	2	FBgn0033232	FBtr0088889	2867	CG12159	uncharacterized protein
183	chr2L	9502767	9502774	8	1-CAAGGTCR-1-chr2L	48.3	-	19.6299	Intron (FBtr0089853/FBgn0032120, intron 1 of 14)	9495474	9520696	25223	1	FBgn0032120	FBtr0301065	7293	CG33298	uncharacterized protein
184	chr2R	7665735	7665742	8	1-CAAGGTCR-1-chr2R	43.8	-	19.6103	Promoter (<=1kb)	7665828	7667343	1516	1	FBgn0033205	FBtr0088923	-86	CG2064	uncharacterized protein
185	chr2L	15912603	15912610	8	1-CAAGGTCR-1-chr2L	39.2	+	19.601	Promoter (<=1kb)	15912558	15913109	552	1	FBgn0266162	FBtr0343724	45	NA	NA
186	chr2L	2130377	2130384	8	1-CAAGGTCR-2-chr2L	38.3	+	19.5695	Promoter (<=1kb)	2130813	2137043	6231	1	FBgn0004507	FBtr0100485	-429	GlyP	Glycogen phosphorylase
187	chr3L	16043053	16043060	8	1-CAAGGTCR-1-chr3L	33.2	+	19.3896	Promoter (<=1kb)	16038410	16042570	4161	2	FBgn0260635	FBtr0075501	-483	Diap1	Death-associated inhibitor of apoptosis 1
188	chr2L	14203840	14203847	8	1-CAAGGTCR-1-chr2L	39.2	-	19.3478	Intron (FBtr0100447/FBgn0016930, intron 4 of 10)	14185662	14197567	11906	2	FBgn0016930	FBtr0336949	-6273	Dyrk2	Dual-specificity tyrosine phosphorylation-regulated kinase 2
189	chr3L	1463572	1463579	8	1-CAAGGTCR-1-chr3L	34.3	+	19.347	Promoter (<=1kb)	1463811	1468475	4665	1	FBgn0004635	FBtr0072694	-232	rho	rhomboid
190	chr3R	11947471	11947478	8	1-CAAGGTCR-1-chr3R	37.8	-	19.3317	Promoter (1-2kb)	11893512	11949129	55618	2	FBgn0037963	FBtr0082513	1651	Cad87A	Cadherin 87A
191	chr2R	13958265	13958272	8	1-CAAGGTCR-1-chr2R	48.3	-	19.329	Promoter (<=1kb)	13943747	13958089	14343	2	FBgn0262739	FBtr0087612	-176	AGO1	Argonaute-1
192	chr2R	16129114	16129121	8	1-CAAGGTCR-1-chr2R	41.2	+	19.1834	Intron (FBtr0089593/FBgn0086676, intron 1 of 7)	16124981	16138238	13258	1	FBgn0086676	FBtr0089592	4133	spin	spinster
193	chr2L	13581628	13581635	8	1-CAAGGTCR-1-chr2L	39.2	+	19.1045	Promoter (<=1kb)	13582569	13583033	465	1	FBgn0266308	FBtr0344037	-934	NA	NA
194	chr2R	6867967	6867974	8	1-CAAGGTCR-1-chr2R	38.3	+	19.0966	Promoter (<=1kb)	6862260	6867795	5536	2	FBgn0265935	FBtr0336654	-172	coro	coro
195	chr3R	17679794	17679801	8	1-CAAGGTCR-1-chr3R	39.2	+	18.9235	Promoter (<=1kb)	17673732	17679876	6145	2	FBgn0038535	FBtr0335026	75	alt	aluminum tubes
196	chr2R	16209086	16209093	8	1-CAAGGTCR-1-chr2R	48.3	+	18.7391	Promoter (<=1kb)	16203329	16209848	6520	2	FBgn0034091	FBtr0087195	755	mrj	mrj
197	chr3R	23792547	23792554	8	1-CAAGGTCR-1-chr3R	42.7	+	18.6998	Exon (FBtr0084459/FBgn0015513, exon 4 of 14)	23781765	23801634	19870	1	FBgn0015513	FBtr0304729	10782	mbc	myoblast city
198	chr3L	13114088	13114095	8	1-CAAGGTCR-1-chr3L	41.2	+	18.6795	Promoter (<=1kb)	13114271	13118077	3807	1	FBgn0010452	FBtr0075890	-176	trn	tartan
199	chr2R	15812890	15812897	8	1-CAAGGTCR-1-chr2R	37.1	+	18.6415	Promoter (2-3kb)	15762565	15814917	52353	2	FBgn0265991	FBtr0100387	2020	Zasp52	Z band alternatively spliced PDZ-motif protein 52
200	chr3R	18475830	18475837	8	1-CAAGGTCR-1-chr3R	40.3	+	18.6264	Intron (FBtr0083644/FBgn0004652, intron 2 of 7)	18418716	18480676	61961	2	FBgn0004652	FBtr0083650	4839	fru	fruitless
201	chr2R	19155153	19155160	8	1-CAAGGTCR-1-chr2R	35.8	-	18.5318	Promoter (<=1kb)	19155221	19162598	7378	1	FBgn0000578	FBtr0086584	-61	ena	enabled
202	chr3L	8729614	8729621	8	1-CAAGGTCR-1-chr3L	43.8	+	18.4735	Promoter (<=1kb)	8729865	8730604	740	1	FBgn0000358	FBtr0076573	-244	Cp19	Chorion protein 19
203	chr3R	26544547	26544554	8	1-CAAGGTCR-2-chr3R	40.3	-	18.4303	Promoter (1-2kb)	26541292	26543209	1918	2	FBgn0267753	FBtr0347317	-1338	NA	NA
204	chr3L	22408362	22408369	8	1-CAAGGTCR-1-chr3L	37.1	+	18.2144	Promoter (<=1kb)	22293984	22407863	113880	2	FBgn0004449	FBtr0330159	-499	Ten-m	Tenascin major
205	chr2R	24979993	24980000	8	1-CAAGGTCR-1-chr2R	36.7	-	18.1982	Promoter (1-2kb)	24976605	24981158	4554	2	FBgn0010435	FBtr0343507	1158	emp	epithelial membrane protein
206	chr3L	18105918	18105925	8	1-CAAGGTCR-1-chr3L	36.7	-	18.1835	Promoter (<=1kb)	18088417	18106149	17733	2	FBgn0036773	FBtr0075137	224	CG13698	uncharacterized protein
207	chr3R	29993038	29993045	8	1-CAAGGTCR-1-chr3R	43.8	-	18.1377	Promoter (<=1kb)	29991144	29993276	2133	2	FBgn0000032	FBtr0085610	231	Acph-1	Acid phosphatase 1
208	chr3R	26261558	26261565	8	1-CAAGGTCR-1-chr3R	35.5	+	18.0182	Promoter (<=1kb)	26254069	26261591	7523	2	FBgn0000064	FBtr0084994	26	Ald1	Aldolase 1
209	chr2L	19440148	19440155	8	1-CAAGGTCR-1-chr2L	36.2	-	18.0125	Promoter (<=1kb)	19435850	19440907	5058	2	FBgn0032783	FBtr0081208	752	CG10237	uncharacterized protein
210	chr3L	17913300	17913307	8	1-CAAGGTCR-1-chr3L	45.7	+	18.0086	Promoter (<=1kb)	17909483	17912565	3083	2	FBgn0036772	FBtr0075152	-735	CG5290	uncharacterized protein
211	chr2R	24958132	24958139	8	1-CAAGGTCR-1-chr2R	45.7	-	17.7433	Promoter (<=1kb)	24955777	24957359	1583	2	FBgn0266088	FBtr0343500	-773	NA	NA
212	chr2R	11383945	11383952	8	1-CAAGGTCR-2-chr2R	37.1	-	17.7165	Promoter (<=1kb)	11380347	11384114	3768	2	FBgn0033631	FBtr0110897	162	Sod3	Superoxide dismutase 3
213	chr3L	19261529	19261536	8	1-CAAGGTCR-1-chr3L	39.8	+	17.7091	Promoter (<=1kb)	19261394	19262437	1044	1	FBgn0260857	FBtr0074990	135	Bet1	Blocked early in transport 1
214	chr2R	16217431	16217438	8	1-CAAGGTCR-1-chr2R	35.8	-	17.5529	Promoter (2-3kb)	16219374	16219445	72	2	FBgn0050238	FBtr0087197	2007	NA	NA
215	chr2R	14483939	14483946	8	1-CAAGGTCR-1-chr2R	40.3	+	17.5443	Promoter (2-3kb)	14481187	14497312	16126	1	FBgn0267824	FBtr0347396	2752	PRAS40	Proline-rich Akt substrate 40 kDa
216	chrX	692939	692946	8	1-CAAGGTCR-1-chrX	42.7	+	17.3889	Intron (FBtr0070130/FBgn0021764, intron 2 of 14)	686834	749496	62663	1	FBgn0021764	FBtr0340197	6105	sdk	sidekick
217	chr3R	26969264	26969271	8	1-CAAGGTCR-2-chr3R	33.7	-	17.3778	Promoter (2-3kb)	26966930	26977878	10949	1	FBgn0039466	FBtr0301134	2334	CG5521	uncharacterized protein
218	chrX	11807577	11807584	8	1-CAAGGTCR-1-chrX	38.8	-	17.2195	Promoter (<=1kb)	11801696	11807117	5422	2	FBgn0001218	FBtr0073608	-460	Hsc70-3	Heat shock 70-kDa protein cognate 3
219	chrX	15118808	15118815	8	1-CAAGGTCR-1-chrX	36.7	-	17.0239	Promoter (2-3kb)	15113302	15116542	3241	2	FBgn0030615	FBtr0074028	-2266	Cyp4s3	Cyp4s3
220	chr3R	26969025	26969032	8	1-CAAGGTCR-1-chr3R	38.8	-	17.0055	Promoter (2-3kb)	26966930	26977878	10949	1	FBgn0039466	FBtr0301134	2095	CG5521	uncharacterized protein
221	chrX	15298660	15298667	8	1-CAAGGTCR-1-chrX	34.9	+	16.9785	Promoter (<=1kb)	15299009	15319074	20066	1	FBgn0261703	FBtr0303198	-342	gce	germ cell-expressed bHLH-PAS
222	chr3R	19056488	19056495	8	1-CAAGGTCR-1-chr3R	41.8	-	16.8519	Promoter (1-2kb)	19058020	19058519	500	1	FBgn0267708	FBtr0347247	-1525	NA	NA
223	chr2R	14318096	14318103	8	1-CAAGGTCR-1-chr2R	41.8	+	16.8098	Intron (FBtr0112614/FBgn0085408, intron 2 of 9)	14308142	14351802	43661	1	FBgn0085408	FBtr0339991	9954	Shrm	Shroom
224	chr2L	14020785	14020792	8	1-CAAGGTCR-1-chr2L	41.2	-	16.6106	Promoter (<=1kb)	14019357	14020208	852	2	FBgn0001967	FBtr0290243	-577	NimC3	Nimrod C3
225	chr3L	19071581	19071588	8	1-CAAGGTCR-1-chr3L	41.8	-	16.5823	Promoter (<=1kb)	19067732	19072396	4665	2	FBgn0036844	FBtr0075036	808	Mkp3	Mitogen-activated protein kinase phosphatase 3
226	chrX	8892599	8892606	8	1-CAAGGTCR-1-chrX	34.9	-	16.5614	Promoter (<=1kb)	8873623	8891807	18185	2	FBgn0011661	FBtr0071278	-792	Moe	Moesin
227	chr3L	19858108	19858115	8	1-CAAGGTCR-1-chr3L	43.8	+	16.5321	Intron (FBtr0074885/FBgn0020389, intron 2 of 4)	19861458	19861869	412	1	FBgn0266982	FBtr0345884	-3343	NA	NA
228	chrX	3694770	3694777	8	1-CAAGGTCR-1-chrX	48.3	-	16.4831	Intron (FBtr0301821/FBgn0023215, intron 3 of 8)	3689363	3701672	12310	1	FBgn0023215	FBtr0343578	5407	Mnt	Mnt
229	chrX	2357306	2357313	8	1-CAAGGTCR-1-chrX	36.5	+	16.4202	Promoter (2-3kb)	2345266	2354726	9461	2	FBgn0003159	FBtr0307285	-2580	CG2841	uncharacterized protein
230	chr2R	10868972	10868979	8	1-CAAGGTCR-1-chr2R	33.2	+	16.3934	Intron (FBtr0088242/FBgn0050015, intron 1 of 7)	10839102	10874771	35670	2	FBgn0050015	FBtr0088242	5792	CG30015	uncharacterized protein
231	chrX	12725319	12725326	8	1-CAAGGTCR-1-chrX	36	+	16.2663	Intron (FBtr0333767/FBgn0265523, intron 2 of 9)	12717624	12730953	13330	2	FBgn0264678	FBtr0333774	5627	NA	NA
232	chr3R	20274593	20274600	8	1-CAAGGTCR-1-chr3R	39.2	-	16.0734	Intron (FBtr0305029/FBgn0262582, intron 2 of 18)	20293044	20301377	8334	1	FBgn0262582	FBtr0334306	-18444	cic	capicua
233	chrX	21076720	21076727	8	1-CAAGGTCR-1-chrX	45.7	-	16.0159	Intron (FBtr0077246/FBgn0031150, intron 6 of 6)	21062384	21067540	5157	2	FBgn0052512	FBtr0077262	-9180	CG32512	uncharacterized protein
234	chr2R	21527087	21527094	8	1-CAAGGTCR-1-chr2R	34.7	+	15.8917	Intron (FBtr0071653/FBgn0003731, intron 1 of 4)	21522420	21559977	37558	1	FBgn0003731	FBtr0071653	4667	Egfr	Epidermal growth factor receptor
235	chr3L	2272846	2272853	8	1-CAAGGTCR-1-chr3L	45.7	+	15.8916	Promoter (<=1kb)	2269881	2272769	2889	2	FBgn0041709	FBtr0072902	-77	yellow-g	yellow-g
236	chr3L	7381551	7381558	8	1-CAAGGTCR-1-chr3L	41.2	+	15.8169	Promoter (<=1kb)	7381614	7385637	4024	1	FBgn0016983	FBtr0333404	-56	smid	smallminded
237	chrX	18869241	18869248	8	1-CAAGGTCR-1-chrX	35.6	-	15.7949	Intron (FBtr0112653/FBgn0085430, intron 1 of 7)	18863950	18884075	20126	1	FBgn0085430	FBtr0333160	5291	CG34401	uncharacterized protein
238	chr3R	21203218	21203225	8	1-CAAGGTCR-1-chr3R	41.2	+	15.6605	Promoter (1-2kb)	21204928	21212687	7760	1	FBgn0264357	FBtr0084024	-1703	SNF4Agamma	SNF4/AMP-activated protein kinase gamma subunit
239	chr2L	452643	452650	8	1-CAAGGTCR-1-chr2L	42.7	-	15.5489	Promoter (<=1kb)	448716	452752	4037	2	FBgn0015924	FBtr0331232	102	crq	croquemort
240	chr2L	15911009	15911016	8	1-CAAGGTCR-1-chr2L	35.8	+	15.5026	Promoter (<=1kb)	15911691	15912062	372	1	FBgn0266161	FBtr0343723	-675	NA	NA
241	chrX	11514185	11514192	8	1-CAAGGTCR-1-chrX	36	+	15.4462	Intron (FBtr0301020/FBgn0052666, intron 2 of 5)	11493819	11555045	61227	1	FBgn0052666	FBtr0340295	20366	Drak	Death-associated protein kinase related
242	chr2R	10776885	10776892	8	1-CAAGGTCR-1-chr2R	41.8	-	15.398	Intron (FBtr0302517/FBgn0053144, intron 2 of 8)	10740396	10782869	42474	2	FBgn0053144	FBtr0088254	5977	CG33144	uncharacterized protein
243	chr2L	9227736	9227743	8	1-CAAGGTCR-1-chr2L	37.1	+	15.2094	Intron (FBtr0303871/FBgn0041092, intron 2 of 13)	9236521	9236594	74	2	FBgn0051885	FBtr0079820	8851	NA	NA
244	chr2L	7487647	7487654	8	1-CAAGGTCR-1-chr2L	39.2	-	15.0293	Intron (FBtr0330721/FBgn0260486, intron 2 of 13)	7472513	7496307	23795	2	FBgn0260486	FBtr0330721	8653	Ziz	Zizimin
245	chr3R	12688849	12688856	8	1-CAAGGTCR-2-chr3R	33.1	+	15.0031	Promoter (<=1kb)	12682186	12689367	7182	2	FBgn0001296	FBtr0082666	511	kar	karmoisin
246	chr2R	14322657	14322664	8	1-CAAGGTCR-1-chr2R	43.8	-	14.9189	Intron (FBtr0112614/FBgn0085408, intron 2 of 9)	14332384	14351802	19419	1	FBgn0085408	FBtr0290253	-9720	Shrm	Shroom
247	chr2L	8732727	8732734	8	1-CAAGGTCR-1-chr2L	43.8	+	14.8396	Intron (FBtr0079746/FBgn0003209, intron 2 of 9)	8709880	8735797	25918	2	FBgn0003209	FBtr0079746	3063	raw	raw
248	chr3L	140067	140074	8	1-CAAGGTCR-1-chr3L	36.7	+	14.6494	Promoter (<=1kb)	141066	144054	2989	1	FBgn0020386	FBtr0072469	-992	Pdk1	Phosphoinositide-dependent kinase 1
249	chr3R	18244576	18244583	8	1-CAAGGTCR-1-chr3R	42.7	-	14.5215	Promoter (1-2kb)	18242687	18248579	5893	1	FBgn0020238	FBtr0083567	1889	14-3-3epsilon	14-3-3epsilon
250	chrX	11524182	11524189	8	1-CAAGGTCR-1-chrX	37.5	-	14.4592	Intron (FBtr0301020/FBgn0052666, intron 2 of 5)	11547422	11547497	76	1	FBgn0262335	FBtr0304518	-23233	NA	NA
251	chr2L	9502930	9502937	8	1-CAAGGTCR-4-chr2L	33.7	+	14.3998	Intron (FBtr0089853/FBgn0032120, intron 1 of 14)	9495474	9520696	25223	1	FBgn0032120	FBtr0301065	7456	CG33298	uncharacterized protein
252	chrX	19608548	19608555	8	1-CAAGGTCR-1-chrX	45.7	+	14.3944	Promoter (1-2kb)	19610138	19611153	1016	1	FBgn0031037	FBtr0307161	-1583	CG14207	uncharacterized protein
253	chr3R	31605983	31605990	8	1-CAAGGTCR-1-chr3R	43.8	+	14.3893	Intron (FBtr0333328/FBgn0039858, intron 1 of 5)	31598803	31609815	11013	2	FBgn0039858	FBtr0085803	3825	CycG	Cyclin G
254	chr2L	9175344	9175351	8	1-CAAGGTCR-1-chr2L	33.4	+	14.2809	Promoter (1-2kb)	9176358	9247186	70829	1	FBgn0041092	FBtr0303870	-1007	tai	taiman
255	chrX	18366307	18366314	8	1-CAAGGTCR-1-chrX	36	+	14.1475	Promoter (<=1kb)	18366357	18376817	10461	1	FBgn0265784	FBtr0346093	-43	CrebB	Cyclic-AMP response element binding protein B
256	chr3L	140084	140091	8	1-CAAGGTCR-2-chr3L	36.5	+	14.1126	Promoter (<=1kb)	141066	144054	2989	1	FBgn0020386	FBtr0072469	-975	Pdk1	Phosphoinositide-dependent kinase 1
257	chr2R	14574658	14574665	8	1-CAAGGTCR-2-chr2R	34.6	-	14.0127	Promoter (1-2kb)	14570810	14575771	4962	2	FBgn0010397	FBtr0087512	1106	LamC	Lamin C
258	chr2R	18605815	18605822	8	1-CAAGGTCR-1-chr2R	36.2	+	14.009	Intron (FBtr0300421/FBgn0050115, intron 1 of 7)	18554119	18611777	57659	2	FBgn0050115	FBtr0300421	5955	GEFmeso	Guanine nucleotide exchange factor in mesoderm
259	chr2R	21530257	21530264	8	1-CAAGGTCR-1-chr2R	33.5	-	13.9486	Promoter (1-2kb)	21531595	21532195	601	2	FBgn0265938	FBtr0342902	1931	NA	NA
260	chr3R	10080933	10080940	8	1-CAAGGTCR-1-chr3R	48.3	+	13.829	Promoter (2-3kb)	10083381	10090525	7145	1	FBgn0266414	FBtr0344594	-2441	NA	NA
261	chr3R	11211512	11211519	8	1-CAAGGTCR-1-chr3R	36.5	+	13.6885	Promoter (1-2kb)	11210247	11211898	1652	1	FBgn0037874	FBtr0347181	1265	Tctp	Translationally controlled tumor protein
262	chr2L	15909812	15909819	8	1-CAAGGTCR-1-chr2L	40.3	-	13.6533	Promoter (1-2kb)	15911691	15912062	372	1	FBgn0266161	FBtr0343723	-1872	NA	NA
263	chr3R	10095002	10095009	8	1-CAAGGTCR-1-chr3R	48.3	-	13.4659	Promoter (1-2kb)	10093761	10101356	7596	1	FBgn0263413	FBtr0346908	1241	NA	NA
264	chr2R	10534029	10534036	8	1-CAAGGTCR-1-chr2R	48.3	+	13.4074	Promoter (<=1kb)	10504859	10534354	29496	2	FBgn0283521	FBtr0089343	318	lola	longitudinals lacking
265	chr2L	10514049	10514056	8	1-CAAGGTCR-1-chr2L	36.2	+	13.2516	Promoter (2-3kb)	10511253	10516668	5416	2	FBgn0267828	FBtr0347403	2612	Fatp1	Fatty acid transport protein 1
266	chr2R	22194482	22194489	8	1-CAAGGTCR-1-chr2R	43.8	-	13.2234	Promoter (1-2kb)	22189817	22193155	3339	2	FBgn0034709	FBtr0071785	-1327	Swim	Secreted Wg-interacting molecule
267	chrX	6220147	6220154	8	1-CAAGGTCR-1-chrX	41.8	+	13.167	Promoter (<=1kb)	6220255	6222719	2465	1	FBgn0029849	FBtr0070875	-101	Efr	ER GDP-fucose transporter
268	chr3R	21065925	21065932	8	1-CAAGGTCR-1-chr3R	34.6	+	13.0891	Promoter (<=1kb)	21065883	21069754	3872	1	FBgn0000083	FBtr0336797	42	AnxB9	Annexin B9
269	chrX	10111811	10111818	8	1-CAAGGTCR-1-chrX	39.2	+	13.0568	Intron (FBtr0110782/FBgn0083940, intron 3 of 6)	10124347	10124445	99	1	FBgn0086045	FBtr0114321	-12529	NA	NA
270	chr2L	1928146	1928153	8	1-CAAGGTCR-1-chr2L	45.7	-	12.8698	Promoter (<=1kb)	1927753	1943947	16195	1	FBgn0031374	FBtr0110883	393	Wdr62	WD repeat domain 62
271	chr3L	16338014	16338021	8	1-CAAGGTCR-1-chr3L	48.3	+	12.6727	Promoter (<=1kb)	16339003	16345241	6239	1	FBgn0036612	FBtr0075377	-982	CG4998	uncharacterized protein
272	chr2L	18641612	18641619	8	1-CAAGGTCR-1-chr2L	38.8	+	12.5727	Intron (FBtr0081073/FBgn0032694, intron 2 of 3)	18651058	18653010	1953	2	FBgn0032693	FBtr0081077	11391	Cyp310a1	Cyp310a1
273	chrX	2159106	2159113	8	1-CAAGGTCR-1-chrX	34.7	-	12.4761	Promoter (<=1kb)	2150107	2158983	8877	2	FBgn0004655	FBtr0070429	-123	wapl	wings apart-like
274	chrX	19148238	19148245	8	1-CAAGGTCR-1-chrX	38	-	12.4245	Intron (FBtr0299623/FBgn0261461, intron 3 of 7)	19142113	19153458	11346	2	FBgn0261461	FBtr0299624	5213	RhoGAP18B	Rho GTPase activating protein at 18B
275	chr2L	19114345	19114352	8	1-CAAGGTCR-1-chr2L	34.9	+	12.3705	Promoter (<=1kb)	19114401	19116570	2170	1	FBgn0002036	FBtr0081155	-49	CG10561	uncharacterized protein
276	chr3L	17611888	17611895	8	1-CAAGGTCR-1-chr3L	33.2	-	12.2966	Intron (FBtr0075202/FBgn0000567, intron 1 of 7)	17560158	17619325	59168	2	FBgn0000567	FBtr0075202	7430	Eip74EF	Ecdysone-induced protein 74EF
277	chr3L	18783818	18783825	8	1-CAAGGTCR-1-chr3L	35.8	+	12.2698	Intron (FBtr0075086/FBgn0001078, intron 2 of 9)	18751749	18801309	49561	2	FBgn0001078	FBtr0075086	17484	ftz-f1	ftz transcription factor 1
278	chrX	13818069	13818076	8	1-CAAGGTCR-1-chrX	39.2	-	12.2197	Intron (FBtr0073835/FBgn0030529, intron 1 of 3)	13812971	13822307	9337	2	FBgn0030529	FBtr0073835	4231	Clic	Chloride intracellular channel
279	chr3R	7123027	7123034	8	1-CAAGGTCR-1-chr3R	34.6	+	12.1344	Promoter (<=1kb)	7097683	7123738	26056	2	FBgn0261238	FBtr0081613	704	Alh	Alhambra
280	chr3R	15665138	15665145	8	1-CAAGGTCR-1-chr3R	48.3	-	12.1047	Promoter (1-2kb)	15666183	15688451	22269	1	FBgn0053207	FBtr0083162	-1038	pxb	pxb
281	chr3R	23157161	23157168	8	1-CAAGGTCR-1-chr3R	39.8	-	12.1027	Promoter (<=1kb)	23149653	23157862	8210	2	FBgn0004395	FBtr0337052	694	unk	unkempt
282	chr3L	823797	823804	8	1-CAAGGTCR-1-chr3L	34.9	-	12.0354	Downstream (2-3kb)	820759	821512	754	1	FBgn0264475	FBtr0332751	3038	NA	NA
283	chr3R	4729982	4729989	8	1-CAAGGTCR-1-chr3R	42.7	+	11.8103	Promoter (1-2kb)	4719458	4731878	12421	2	FBgn0027570	FBtr0333922	1889	Nep2	Neprilysin 2
284	chr3L	18057169	18057176	8	1-CAAGGTCR-1-chr3L	38.3	+	11.6925	Promoter (2-3kb)	17953358	18059598	106241	2	FBgn0000568	FBtr0075148	2422	Eip75B	Ecdysone-induced protein 75B
285	chr2L	8534655	8534662	8	1-CAAGGTCR-1-chr2L	34.4	+	11.6776	Promoter (1-2kb)	8535786	8537932	2147	1	FBgn0028394	FBtr0079688	-1124	CG17834	uncharacterized protein
286	chr3R	30134286	30134293	8	1-CAAGGTCR-1-chr3R	43.8	-	11.5459	Promoter (<=1kb)	30132981	30134309	1329	2	FBgn0086355	FBtr0085583	16	Tpi	Triose phosphate isomerase
287	chr2R	21312691	21312698	8	1-CAAGGTCR-1-chr2R	38.3	-	11.389	Promoter (<=1kb)	21312674	21319569	6896	1	FBgn0034618	FBtr0300395	17	CG9485	uncharacterized protein
288	chr3L	19905727	19905734	8	1-CAAGGTCR-1-chr3L	36.5	-	11.3619	Intron (FBtr0074919/FBgn0262519, intron 1 of 5)	19909365	19910203	839	1	FBgn0264481	FBtr0332770	-3631	NA	NA
289	chrX	2303109	2303116	8	1-CAAGGTCR-1-chrX	39.2	-	11.35	Intron (FBtr0344007/FBgn0003079, intron 2 of 6)	2295466	2343870	48405	1	FBgn0003079	FBtr0344007	7643	Raf	Raf oncogene
290	chrX	15025657	15025664	8	1-CAAGGTCR-1-chrX	35.3	-	11.3447	Promoter (1-2kb)	15024436	15042060	17625	1	FBgn0052594	FBtr0073957	1221	be	ben
291	chrX	6356466	6356473	8	1-CAAGGTCR-1-chrX	33.5	-	11.2423	Intron (FBtr0070906/FBgn0261955, intron 1 of 2)	6352282	6361323	9042	1	FBgn0261955	FBtr0070907	4184	kdn	knockdown
292	chr3R	9954703	9954710	8	1-CAAGGTCR-1-chr3R	42.7	-	11.2051	3' UTR	9928917	9995364	66448	1	FBgn0267336	FBtr0305157	25786	Glut4EF	Glucose transporter 4 enhancer factor
293	chr3R	9391604	9391611	8	1-CAAGGTCR-1-chr3R	38.3	+	11.1294	Promoter (2-3kb)	9393890	9394737	848	1	FBgn0267820	FBtr0347392	-2279	NA	NA
294	chr3R	25659017	25659024	8	1-CAAGGTCR-1-chr3R	33.2	+	10.9934	Promoter (1-2kb)	25657393	25658274	882	1	FBgn0267770	FBtr0347334	1624	NA	NA
295	chr3R	19906317	19906324	8	1-CAAGGTCR-3-chr3R	34.6	-	10.9687	Promoter (<=1kb)	19905449	19913730	8282	1	FBgn0038747	FBtr0344353	868	RhoGAP92B	Rho GTPase activating protein at 92B
296	chr3R	18469058	18469065	8	1-CAAGGTCR-1-chr3R	48.3	-	10.9637	Intron (FBtr0083644/FBgn0004652, intron 2 of 7)	18418716	18480676	61961	2	FBgn0004652	FBtr0083650	11611	fru	fruitless
297	chr3R	14016607	14016614	8	1-CAAGGTCR-1-chr3R	33.4	+	10.8252	Intron (FBtr0301634/FBgn0264493, intron 2 of 8)	13967955	14025962	58008	2	FBgn0264493	FBtr0301634	9348	rdx	roadkill
298	chr3L	21129938	21129945	8	1-CAAGGTCR-1-chr3L	34.3	+	10.7853	Promoter (1-2kb)	21075581	21131159	55579	2	FBgn0020294	FBtr0078324	1214	ko	knockout
299	chr3L	16047012	16047019	8	1-CAAGGTCR-1-chr3L	37.8	-	10.7434	Promoter (<=1kb)	16038410	16046846	8437	2	FBgn0260635	FBtr0333618	-166	Diap1	Death-associated inhibitor of apoptosis 1
300	chr2L	2908972	2908979	8	1-CAAGGTCR-2-chr2L	35.3	+	10.6896	Intron (FBtr0077632/FBgn0041111, intron 2 of 12)	2890171	2953077	62907	1	FBgn0041111	FBtr0290041	18801	lilli	lilliputian
301	chrX	9501967	9501974	8	1-CAAGGTCR-1-chrX	39.2	+	10.6689	Promoter (1-2kb)	9359850	9500129	140280	2	FBgn0261260	FBtr0302153	-1838	mgl	Megalin
302	chr3L	10665622	10665629	8	1-CAAGGTCR-1-chr3L	39.8	+	10.5877	Promoter (<=1kb)	10664739	10690734	25996	1	FBgn0010762	FBtr0331574	883	simj	simjang
303	chr2L	18648761	18648768	8	1-CAAGGTCR-1-chr2L	38	+	10.5575	Intron (FBtr0081073/FBgn0032694, intron 2 of 3)	18651058	18653010	1953	2	FBgn0032693	FBtr0081077	4242	Cyp310a1	Cyp310a1
304	chrX	17881933	17881940	8	1-CAAGGTCR-1-chrX	48.3	+	10.5058	Promoter (1-2kb)	17883718	17885238	1521	1	FBgn0030881	FBtr0074494	-1778	CG12985	uncharacterized protein
305	chr3R	19906335	19906342	8	1-CAAGGTCR-1-chr3R	42.7	-	10.4521	Promoter (<=1kb)	19905449	19913730	8282	1	FBgn0038747	FBtr0344353	886	RhoGAP92B	Rho GTPase activating protein at 92B
306	chr3R	9430808	9430815	8	1-CAAGGTCR-1-chr3R	45.7	+	10.4421	Promoter (1-2kb)	9432602	9448649	16048	1	FBgn0261552	FBtr0334304	-1787	ps	pasilla
307	chr2R	7911704	7911711	8	1-CAAGGTCR-1-chr2R	41.2	+	10.4397	Intron (FBtr0088844/FBgn0050377, intron 4 of 4)	7915027	7916478	1452	2	FBgn0033232	FBtr0088889	4767	CG12159	uncharacterized protein
308	chrX	15298240	15298247	8	1-CAAGGTCR-1-chrX	36.2	-	10.4357	Promoter (<=1kb)	15297312	15298217	906	2	FBgn0265611	FBtr0340435	-23	NA	NA
309	chrX	8482622	8482629	8	1-CAAGGTCR-2-chrX	34.9	+	10.3347	Promoter (<=1kb)	8481837	8483311	1475	1	FBgn0000360	FBtr0300448	785	Cp38	Chorion protein 38
310	chr2R	22318705	22318712	8	1-CAAGGTCR-1-chr2R	36	-	10.2982	Promoter (<=1kb)	22318252	22329416	11165	1	FBgn0013272	FBtr0342985	453	Gp150	Gp150
311	chr3R	9380125	9380132	8	1-CAAGGTCR-1-chr3R	48.3	-	10.2863	Intron (FBtr0082051/FBgn0000723, intron 3 of 12)	9367603	9374811	7209	2	FBgn0000723	FBtr0082053	-5314	FER	FER tyrosine kinase
312	chrX	16813626	16813633	8	1-CAAGGTCR-1-chrX	40.3	+	10.2603	Promoter (1-2kb)	16811699	16826494	14796	1	FBgn0030796	FBtr0112995	1927	CG4829	uncharacterized protein
313	chr2R	13509590	13509597	8	1-CAAGGTCR-1-chr2R	41.2	+	10.2019	Promoter (<=1kb)	13509618	13513112	3495	1	FBgn0033846	FBtr0301388	-21	mip120	Myb-interacting protein 120
314	chr3R	7506616	7506623	8	1-CAAGGTCR-1-chr3R	40.3	-	10.0693	Promoter (1-2kb)	7494097	7505098	11002	2	FBgn0015577	FBtr0302354	-1518	alpha-Est9	alpha-Esterase-9
315	chr3L	4729625	4729632	8	1-CAAGGTCR-2-chr3L	33.7	-	10.0392	Intron (FBtr0073345/FBgn0035574, intron 2 of 10)	4744950	4745310	361	1	FBgn0267645	FBtr0347101	-15318	NA	NA
316	chr3R	4449087	4449094	8	1-CAAGGTCR-1-chr3R	34.9	+	10.022	Promoter (1-2kb)	4441415	4450843	9429	2	FBgn0051522	FBtr0078941	1749	CG31522	uncharacterized protein
317	chr2R	13584380	13584387	8	1-CAAGGTCR-1-chr2R	34.4	+	9.73029	Intron (FBtr0330617/FBgn0027581, intron 2 of 8)	13578036	13579626	1591	1	FBgn0265497	FBtr0339944	6344	NA	NA
318	chr2L	16273638	16273645	8	1-CAAGGTCR-1-chr2L	40.3	-	9.72386	Intron (FBtr0343814/FBgn0001994, intron 2 of 2)	16262141	16263483	1343	1	FBgn0028897	FBtr0080825	11497	CG4935	uncharacterized protein
319	chr3L	16973747	16973754	8	1-CAAGGTCR-1-chr3L	42.7	+	9.71015	Promoter (2-3kb)	16976344	16994388	18045	1	FBgn0261547	FBtr0302650	-2590	Exn	Ephexin
320	chr3L	10766792	10766799	8	1-CAAGGTCR-1-chr3L	39.8	+	9.70757	Distal Intergenic	10771925	10773399	1475	1	FBgn0262890	FBtr0306304	-5126	CG43245	uncharacterized protein
321	chr3R	23658846	23658853	8	1-CAAGGTCR-1-chr3R	34.6	+	9.69837	Intron (FBtr0290056/FBgn0051145, intron 3 of 16)	23605751	23669659	63909	2	FBgn0051145	FBtr0290056	10806	CG31145	uncharacterized protein
322	chr3L	20509235	20509242	8	1-CAAGGTCR-1-chr3L	35.8	-	9.56338	Promoter (<=1kb)	20509687	20514107	4421	1	FBgn0052425	FBtr0078205	-445	CG32425	uncharacterized protein
323	chrX	9632752	9632759	8	1-CAAGGTCR-1-chrX	34.7	+	9.47389	Intron (FBtr0071407/FBgn0028341, intron 2 of 6)	9628722	9639028	10307	2	FBgn0028341	FBtr0100192	6269	Ptpmeg2	Protein tyrosine phosphatase Meg2
324	chr3R	30134247	30134254	8	1-CAAGGTCR-3-chr3R	33.1	-	9.24989	Promoter (<=1kb)	30132981	30134309	1329	2	FBgn0086355	FBtr0085583	55	Tpi	Triose phosphate isomerase
325	chrX	1949709	1949716	8	1-CAAGGTCR-1-chrX	38.8	+	8.96237	Intron (FBtr0333337/FBgn0264562, intron 2 of 11)	1941940	2007956	66017	1	FBgn0264562	FBtr0333345	7769	Hr4	Hormone receptor 4
326	chr2L	13581727	13581734	8	1-CAAGGTCR-2-chr2L	37.5	+	8.90239	Promoter (<=1kb)	13582569	13583033	465	1	FBgn0266308	FBtr0344037	-835	NA	NA
327	chr3L	17960705	17960712	8	1-CAAGGTCR-1-chr3L	39.8	+	8.86404	Promoter (1-2kb)	17953358	17961814	8457	2	FBgn0000568	FBtr0075151	1102	Eip75B	Ecdysone-induced protein 75B
328	chr3L	17604989	17604996	8	1-CAAGGTCR-1-chr3L	33.9	+	8.79669	Intron (FBtr0075202/FBgn0000567, intron 1 of 7)	17560158	17619325	59168	2	FBgn0000567	FBtr0075202	14329	Eip74EF	Ecdysone-induced protein 74EF
329	chr3L	9358322	9358329	8	1-CAAGGTCR-3-chr3L	33.4	+	8.69984	Promoter (<=1kb)	9351457	9357883	6427	2	FBgn0035978	FBtr0076501	-439	UGP	UGP
330	chr3L	15242932	15242939	8	1-CAAGGTCR-1-chr3L	35.3	-	8.66796	Distal Intergenic	15235619	15242832	7214	1	FBgn0029114	FBtr0075607	7313	Tollo	tollo
331	chrX	12509834	12509841	8	1-CAAGGTCR-1-chrX	33.2	+	8.57495	Intron (FBtr0073652/FBgn0030396, intron 1 of 3)	12497701	12497808	108	1	FBgn0086047	FBtr0114323	12133	NA	NA
332	chr3R	15475867	15475874	8	1-CAAGGTCR-1-chr3R	36.2	+	8.57399	Promoter (<=1kb)	15442246	15476193	33948	2	FBgn0038341	FBtr0083160	319	NA	NA
333	chr3L	18144646	18144653	8	1-CAAGGTCR-3-chr3L	34.4	-	8.54284	Intron (FBtr0075126/FBgn0020300, intron 2 of 2)	18148923	18153627	4705	1	FBgn0036780	FBtr0075127	-4270	CG7330	uncharacterized protein
334	chr3R	14004171	14004178	8	1-CAAGGTCR-1-chr3R	39.2	-	8.46199	Intron (FBtr0301634/FBgn0264493, intron 2 of 8)	13967955	13983363	15409	2	FBgn0264493	FBtr0100361	-20808	rdx	roadkill
335	chr3R	5264034	5264041	8	1-CAAGGTCR-1-chr3R	43.8	-	8.40512	Promoter (<=1kb)	5263757	5264511	755	2	FBgn0267443	FBtr0346781	470	NA	NA
336	chr2R	22548010	22548017	8	1-CAAGGTCR-1-chr2R	35.5	+	8.36388	Promoter (1-2kb)	22496504	22546558	50055	2	FBgn0003175	FBtr0112820	-1452	px	plexus
337	chr3L	9358346	9358353	8	1-CAAGGTCR-2-chr3L	34.7	+	8.35694	Promoter (<=1kb)	9351457	9357883	6427	2	FBgn0035978	FBtr0076501	-463	UGP	UGP
338	chr3R	14711450	14711457	8	1-CAAGGTCR-1-chr3R	41.8	-	8.28564	Intron (FBtr0344383/FBgn0262127, intron 1 of 8)	14697689	14724261	26573	2	FBgn0262127	FBtr0344383	12804	kibra	kibra
339	chr3L	13114079	13114086	8	1-CAAGGTCR-2-chr3L	33.4	-	8.17246	Promoter (<=1kb)	13114271	13118077	3807	1	FBgn0010452	FBtr0075890	-185	trn	tartan
340	chr3R	10079245	10079252	8	1-CAAGGTCR-1-chr3R	42.7	-	8.06495	Distal Intergenic	10073821	10075373	1553	2	FBgn0037786	FBtr0309853	-3872	Alp13	Alkaline phosphatase 13
341	chr3L	11242239	11242246	8	1-CAAGGTCR-1-chr3L	45.7	-	7.97043	Distal Intergenic	11236500	11237620	1121	2	FBgn0265929	FBtr0342868	-4619	NA	NA
342	chrX	10718706	10718713	8	1-CAAGGTCR-1-chrX	48.3	+	7.89457	Intron (FBtr0333017/FBgn0052676, intron 2 of 3)	10744502	10748806	4305	1	FBgn0003204	FBtr0071495	-25789	ras	raspberry
343	chr3R	9956393	9956400	8	1-CAAGGTCR-1-chr3R	42.7	-	7.87883	3' UTR	9928917	9995364	66448	1	FBgn0267336	FBtr0305157	27476	Glut4EF	Glucose transporter 4 enhancer factor
344	chr3R	7122347	7122354	8	1-CAAGGTCR-1-chr3R	38.8	-	7.84067	Promoter (1-2kb)	7097683	7123738	26056	2	FBgn0261238	FBtr0081613	1384	Alh	Alhambra
345	chr3R	19906322	19906329	8	1-CAAGGTCR-2-chr3R	35.3	-	7.72215	Promoter (<=1kb)	19905449	19913730	8282	1	FBgn0038747	FBtr0344353	873	RhoGAP92B	Rho GTPase activating protein at 92B
346	chr2L	9507015	9507022	8	1-CAAGGTCR-1-chr2L	38.3	+	7.70123	Intron (FBtr0089853/FBgn0032120, intron 2 of 14)	9495474	9520696	25223	1	FBgn0032120	FBtr0301065	11541	CG33298	uncharacterized protein
347	chr3L	9367926	9367933	8	1-CAAGGTCR-1-chr3L	40.3	-	7.55624	Promoter (<=1kb)	9367377	9370300	2924	1	FBgn0035981	FBtr0333883	549	CG4452	uncharacterized protein
348	chr2R	6138744	6138751	8	1-CAAGGTCR-1-chr2R	38.8	-	7.54509	Promoter (1-2kb)	6137303	6138411	1109	1	FBgn0033063	FBtr0332948	1441	CG14589	uncharacterized protein
349	chr3L	14210164	14210171	8	1-CAAGGTCR-1-chr3L	33.9	-	7.48723	Intron (FBtr0306619/FBgn0013718, intron 5 of 11)	14205432	14233250	27819	1	FBgn0013718	FBtr0307191	4732	nuf	nuclear fallout
350	chr3R	26551728	26551735	8	1-CAAGGTCR-1-chr3R	35.3	-	7.34576	Intron (FBtr0308624/FBgn0263289, intron 3 of 13)	26541292	26543209	1918	2	FBgn0267753	FBtr0347317	-8519	NA	NA
351	chr2L	9503113	9503120	8	1-CAAGGTCR-3-chr2L	41.2	+	7.33937	Intron (FBtr0089853/FBgn0032120, intron 1 of 14)	9495474	9520696	25223	1	FBgn0032120	FBtr0301065	7639	CG33298	uncharacterized protein
352	chrX	12728039	12728046	8	1-CAAGGTCR-1-chrX	39.2	-	7.3329	Promoter (2-3kb)	12717624	12730953	13330	2	FBgn0264678	FBtr0333774	2907	NA	NA
353	chr3L	18952459	18952466	8	1-CAAGGTCR-1-chr3L	37.8	+	7.32608	Promoter (1-2kb)	18950629	18955406	4778	1	FBgn0036834	FBtr0075023	1830	CG6836	uncharacterized protein
354	chr3R	14464921	14464928	8	1-CAAGGTCR-1-chr3R	37.5	-	7.27189	Intron (FBtr0112630/FBgn0285955, intron 1 of 14)	14391683	14481713	90031	2	FBgn0285955	FBtr0112630	16785	cv-c	crossveinless c
355	chr2L	3629539	3629546	8	1-CAAGGTCR-1-chr2L	48.3	+	7.21214	Promoter (2-3kb)	3622074	3632154	10081	2	FBgn0000721	FBtr0089306	2608	for	foraging
356	chr3L	8979047	8979054	8	1-CAAGGTCR-1-chr3L	48.3	+	7.13771	Promoter (<=1kb)	8977395	8979880	2486	2	FBgn0035948	FBtr0076556	826	CG5644	uncharacterized protein
357	chr3L	316164	316171	8	1-CAAGGTCR-1-chr3L	48.3	+	7.12249	Promoter (<=1kb)	317084	317699	616	1	FBgn0284444	FBtr0299836	-913	ddbt	deadbeat
358	chr2L	1360573	1360580	8	1-CAAGGTCR-1-chr2L	38.8	-	7.09804	Promoter (<=1kb)	1358925	1359790	866	2	FBgn0051659	FBtr0301010	-783	CG31659	uncharacterized protein
359	chr3R	21126398	21126405	8	1-CAAGGTCR-1-chr3R	43.8	-	6.88433	Promoter (1-2kb)	21119252	21127485	8234	2	FBgn0283468	FBtr0084032	1080	slmb	supernumerary limbs
360	chr3L	12406955	12406962	8	1-CAAGGTCR-1-chr3L	36.7	+	6.83583	Promoter (1-2kb)	12403505	12405417	1913	2	FBgn0052103	FBtr0332089	-1538	SCaMC	Short Calcium-binding Mitochondrial Carrier
361	chr3L	4729594	4729601	8	1-CAAGGTCR-1-chr3L	36.7	-	6.79586	Intron (FBtr0073345/FBgn0035574, intron 2 of 10)	4744950	4745310	361	1	FBgn0267645	FBtr0347101	-15349	NA	NA
362	chr3R	21059187	21059194	8	1-CAAGGTCR-1-chr3R	38.3	-	6.76844	Promoter (1-2kb)	21051383	21060653	9271	2	FBgn0011672	FBtr0301477	1459	Mvl	Malvolio
363	chr3R	18467559	18467566	8	1-CAAGGTCR-1-chr3R	33.2	-	6.7286	Intron (FBtr0083644/FBgn0004652, intron 2 of 7)	18418716	18480676	61961	2	FBgn0004652	FBtr0083650	13110	fru	fruitless
364	chr2R	6540055	6540062	8	1-CAAGGTCR-1-chr2R	41.8	+	6.66107	Intron (FBtr0114365/FBgn0086655, intron 1 of 6)	6532595	6533595	1001	2	FBgn0264506	FBtr0332951	-6460	NA	NA
365	chr3L	2396961	2396968	8	1-CAAGGTCR-1-chr3L	34.9	+	6.52145	Intron (FBtr0345102/FBgn0266696, intron 1 of 9)	2400509	2409103	8595	1	FBgn0266696	FBtr0345114	-3541	Svil	Supervillin
366	chr3R	10116028	10116035	8	1-CAAGGTCR-1-chr3R	36.7	+	6.47616	Intron (FBtr0344391/FBgn0037788, intron 1 of 3)	10112546	10120081	7536	1	FBgn0037788	FBtr0344392	3482	CAH7	Carbonic anhydrase 7
367	chrX	19608528	19608535	8	1-CAAGGTCR-2-chrX	33.8	-	6.46141	Promoter (1-2kb)	19610138	19611153	1016	1	FBgn0031037	FBtr0307161	-1603	CG14207	uncharacterized protein
368	chr3L	649630	649637	8	1-CAAGGTCR-1-chr3L	38	+	6.34161	Promoter (<=1kb)	648774	651311	2538	1	FBgn0035147	FBtr0306917	856	Gale	UDP-galactose 4'-epimerase
369	chr2R	16127286	16127293	8	1-CAAGGTCR-1-chr2R	35.3	+	6.34096	Promoter (2-3kb)	16124981	16138238	13258	1	FBgn0086676	FBtr0089592	2305	spin	spinster
370	chr2L	16844127	16844134	8	1-CAAGGTCR-2-chr2L	34.3	-	6.30553	Intron (FBtr0345747/FBgn0032614, intron 4 of 5)	16842347	16847197	4851	2	FBgn0032614	FBtr0332334	3063	CG13284	uncharacterized protein
371	chr3R	24090369	24090376	8	1-CAAGGTCR-1-chr3R	42.7	-	6.28936	Intron (FBtr0084587/FBgn0053100, intron 2 of 3)	24101600	24105763	4164	2	FBgn0013343	FBtr0303161	15387	Syx1A	Syntaxin 1A
372	chr3L	17619608	17619615	8	1-CAAGGTCR-1-chr3L	42.7	+	6.21766	Promoter (<=1kb)	17560158	17619325	59168	2	FBgn0000567	FBtr0305796	-283	Eip74EF	Ecdysone-induced protein 74EF
373	chr2L	16844144	16844151	8	1-CAAGGTCR-1-chr2L	39.2	+	5.96658	Intron (FBtr0345747/FBgn0032614, intron 4 of 5)	16842347	16847197	4851	2	FBgn0032614	FBtr0332334	3046	CG13284	uncharacterized protein
374	chr2L	9503021	9503028	8	1-CAAGGTCR-2-chr2L	48.3	-	5.94262	Intron (FBtr0089853/FBgn0032120, intron 1 of 14)	9495474	9520696	25223	1	FBgn0032120	FBtr0301065	7547	CG33298	uncharacterized protein
375	chr2R	24958111	24958118	8	1-CAAGGTCR-2-chr2R	35.6	-	5.88599	Promoter (<=1kb)	24955777	24957359	1583	2	FBgn0266088	FBtr0343500	-752	NA	NA
376	chr3R	26544627	26544634	8	1-CAAGGTCR-1-chr3R	43.8	+	5.85353	Promoter (1-2kb)	26541292	26543209	1918	2	FBgn0267753	FBtr0347317	-1418	NA	NA
377	chr3R	19056580	19056587	8	1-CAAGGTCR-2-chr3R	34.7	-	5.6786	Promoter (1-2kb)	19058020	19058519	500	1	FBgn0267708	FBtr0347247	-1433	NA	NA
378	chr3R	21931769	21931776	8	1-CAAGGTCR-1-chr3R	33.8	-	5.49041	Distal Intergenic	21949114	22006803	57690	1	FBgn0264490	FBtr0112874	-17338	Eip93F	Ecdysone-induced protein 93F
379	chr2R	13558151	13558158	8	1-CAAGGTCR-1-chr2R	33.2	-	5.45838	Promoter (<=1kb)	13557905	13558055	151	2	FBgn0263459	FBtr0309758	-96	NA	NA
380	chr3R	14002857	14002864	8	1-CAAGGTCR-1-chr3R	35.6	-	5.22709	Intron (FBtr0301634/FBgn0264493, intron 2 of 8)	13967955	13983363	15409	2	FBgn0264493	FBtr0100361	-19494	rdx	roadkill
381	chr3L	17378760	17378767	8	1-CAAGGTCR-2-chr3L	36.7	-	5.18236	Promoter (<=1kb)	17367753	17379530	11778	2	FBgn0036715	FBtr0075239	763	Cad74A	Cadherin 74A
382	chr3R	14290444	14290451	8	1-CAAGGTCR-1-chr3R	35.6	-	5.14071	Promoter (<=1kb)	14290401	14302276	11876	1	FBgn0285913	FBtr0082922	43	red	red Malpighian tubules
383	chrX	11516512	11516519	8	1-CAAGGTCR-1-chrX	39.2	-	4.93889	Intron (FBtr0301020/FBgn0052666, intron 2 of 5)	11493819	11555045	61227	1	FBgn0052666	FBtr0340295	22693	Drak	Death-associated protein kinase related
384	chr2R	21571600	21571607	8	1-CAAGGTCR-1-chr2R	45.7	-	4.88354	Promoter (<=1kb)	21560246	21571454	11209	2	FBgn0034636	FBtr0071692	-146	twz	tiwaz
385	chr2L	14246483	14246490	8	1-CAAGGTCR-2-chr2L	36.5	+	4.86337	Distal Intergenic	14241144	14241732	589	1	FBgn0265147	FBtr0336992	5339	NA	NA
386	chr3L	7792145	7792152	8	1-CAAGGTCR-1-chr3L	42.7	+	4.7302	Intron (FBtr0304992/FBgn0052369, intron 2 of 6)	7777852	7804675	26824	2	FBgn0052369	FBtr0076783	12523	CG32369	uncharacterized protein
387	chr3L	17580893	17580900	8	1-CAAGGTCR-1-chr3L	38.8	-	4.72987	Intron (FBtr0075202/FBgn0000567, intron 5 of 7)	17560158	17576626	16469	2	FBgn0000567	FBtr0075204	-4267	Eip74EF	Ecdysone-induced protein 74EF
388	chr3L	9360368	9360375	8	1-CAAGGTCR-1-chr3L	41.2	+	4.69233	Promoter (<=1kb)	9360316	9362042	1727	1	FBgn0085484	FBtr0112761	52	Pdxk	Pyridoxal kinase
389	chrX	6625756	6625763	8	1-CAAGGTCR-1-chrX	37.1	+	4.59751	Intron (FBtr0070948/FBgn0029881, intron 2 of 9)	6633959	6636169	2211	1	FBgn0029880	FBtr0308654	-8196	CG14443	uncharacterized protein
390	chr3L	137669	137676	8	1-CAAGGTCR-1-chr3L	43.8	+	4.50097	Intron (FBtr0072464/FBgn0020386, intron 3 of 5)	141066	144054	2989	1	FBgn0020386	FBtr0072469	-3390	Pdk1	Phosphoinositide-dependent kinase 1
391	chr3L	15539875	15539882	8	1-CAAGGTCR-1-chr3L	35.8	-	4.49603	Intron (FBtr0075557/FBgn0004396, intron 1 of 5)	15535395	15553214	17820	1	FBgn0004396	FBtr0075558	4480	CrebA	Cyclic-AMP response element binding protein A
392	chr3R	22563548	22563555	8	1-CAAGGTCR-1-chr3R	40.3	-	4.46642	Promoter (<=1kb)	22558342	22562572	4231	2	FBgn0038986	FBtr0084281	-976	sit	stuck in traffic
393	chr3R	29896111	29896118	8	1-CAAGGTCR-1-chr3R	38.8	-	4.45392	Promoter (1-2kb)	29894981	29903231	8251	1	FBgn0051038	FBtr0333275	1130	CG31038	uncharacterized protein
394	chr3L	18039262	18039269	8	1-CAAGGTCR-1-chr3L	40.3	+	4.41558	Promoter (<=1kb)	18037723	18038280	558	2	FBgn0267582	FBtr0346996	-982	NA	NA
395	chr3L	8554267	8554274	8	1-CAAGGTCR-1-chr3L	34.9	+	4.3239	Intron (FBtr0305211/FBgn0260442, intron 1 of 12)	8557964	8574409	16446	1	FBgn0260442	FBtr0333105	-3690	rhea	rhea
396	chr3L	8696613	8696620	8	1-CAAGGTCR-1-chr3L	33.1	+	4.20262	Distal Intergenic	8692703	8693191	489	1	FBgn0265719	FBtr0340661	3910	NA	NA
397	chr3R	30134275	30134282	8	1-CAAGGTCR-2-chr3R	37.1	-	4.19279	Promoter (<=1kb)	30132981	30134309	1329	2	FBgn0086355	FBtr0085583	27	Tpi	Triose phosphate isomerase
398	chr3R	4804473	4804480	8	1-CAAGGTCR-1-chr3R	35.8	+	4.11246	Promoter (1-2kb)	4787045	4802842	15798	2	FBgn0260794	FBtr0301437	-1631	ctrip	circadian trip
399	chr3R	7994696	7994703	8	1-CAAGGTCR-1-chr3R	33.5	-	4.09334	Promoter (1-2kb)	7981817	7995852	14036	2	FBgn0037534	FBtr0081823	1149	ELOVL	ELOVL fatty acid elongase
400	chrX	8259151	8259158	8	1-CAAGGTCR-1-chrX	35.6	-	4.06958	Intron (FBtr0071170/FBgn0030027, intron 1 of 7)	8252670	8272462	19793	1	FBgn0030027	FBtr0307282	6481	CG1632	uncharacterized protein
401	chr2R	11384011	11384018	8	1-CAAGGTCR-1-chr2R	38.3	-	3.92234	Promoter (<=1kb)	11380347	11384114	3768	2	FBgn0033631	FBtr0110897	96	Sod3	Superoxide dismutase 3
402	chr3L	7787979	7787986	8	1-CAAGGTCR-1-chr3L	35.3	-	3.79839	Intron (FBtr0304992/FBgn0052369, intron 2 of 6)	7763970	7775603	11634	2	FBgn0023076	FBtr0100134	-12376	Clk	Clock
403	chrX	13753524	13753531	8	1-CAAGGTCR-1-chrX	40.3	-	3.66571	Promoter (1-2kb)	13755322	13756013	692	1	FBgn0264381	FBtr0332276	-1791	NA	NA
404	chr2L	9693482	9693489	8	1-CAAGGTCR-1-chr2L	35.6	+	3.55495	Intron (FBtr0079851/FBgn0000273, intron 2 of 2)	9682315	9699297	16983	2	FBgn0000273	FBtr0079851	5808	Pka-C1	Protein kinase, cAMP-dependent, catalytic subunit 1
405	chr3L	8674939	8674946	8	1-CAAGGTCR-2-chr3L	35.6	-	3.41336	Promoter (<=1kb)	8675759	8679253	3495	1	FBgn0001168	FBtr0100153	-813	h	hairy
406	chr3L	92055	92062	8	1-CAAGGTCR-1-chr3L	38.8	+	3.25785	Distal Intergenic	97628	98375	748	2	FBgn0040688	FBtr0072540	6313	CG12483	uncharacterized protein
407	chr2R	8062758	8062765	8	1-CAAGGTCR-1-chr2R	38	-	3.21461	Promoter (2-3kb)	8052080	8065554	13475	2	FBgn0033252	FBtr0088827	2789	CG12769	uncharacterized protein
408	chr2L	19296735	19296742	8	1-CAAGGTCR-1-chr2L	38.3	-	3.18422	Downstream (1-2kb)	19298345	19299933	1589	2	FBgn0032768	FBtr0081225	3191	CG17564	uncharacterized protein
409	chr3L	3343144	3343151	8	1-CAAGGTCR-1-chr3L	33.8	-	2.9634	Intron (FBtr0303857/FBgn0004167, intron 2 of 14)	3337103	3368133	31031	1	FBgn0004167	FBtr0073072	6041	kst	karst
410	chr3R	18381922	18381929	8	1-CAAGGTCR-1-chr3R	48.3	+	2.93599	Promoter (<=1kb)	18378124	18381178	3055	2	FBgn0038610	FBtr0344550	-744	CG7675	uncharacterized protein
411	chr2R	16127829	16127836	8	1-CAAGGTCR-2-chr2R	33.1	-	2.39737	Promoter (2-3kb)	16124981	16138238	13258	1	FBgn0086676	FBtr0089592	2848	spin	spinster
412	chr3L	99671	99678	8	1-CAAGGTCR-1-chr3L	41.2	+	2.34913	Promoter (1-2kb)	97628	98375	748	2	FBgn0040688	FBtr0072540	-1296	CG12483	uncharacterized protein
413	chr2L	19142398	19142405	8	1-CAAGGTCR-1-chr2L	43.8	+	2.30756	Intron (FBtr0081158/FBgn0010300, intron 1 of 3)	19133023	19135233	2211	2	FBgn0086447	FBtr0336628	-7165	l(2)37Cg	lethal (2) 37Cg
414	chr2L	22018871	22018878	8	1-CAAGGTCR-1-chr2L	40.3	-	2.27359	Promoter (<=1kb)	22019208	22025734	6527	1	FBgn0028979	FBtr0335391	-330	tio	tiptop
415	chrX	6549465	6549472	8	1-CAAGGTCR-1-chrX	36.5	+	2.17989	Intron (FBtr0112703/FBgn0085446, intron 2 of 3)	6546119	6589173	43055	1	FBgn0085446	FBtr0345070	3346	CG34417	uncharacterized protein
416	chr2L	14666982	14666989	8	1-CAAGGTCR-1-chr2L	33.8	-	1.97813	Intron (FBtr0301496/FBgn0003016, intron 1 of 11)	14599196	14689340	90145	2	FBgn0003016	FBtr0301496	22351	osp	outspread
417	chr2R	16020600	16020607	8	1-CAAGGTCR-1-chr2R	48.3	+	1.94288	Promoter (2-3kb)	16017737	16024627	6891	1	FBgn0034067	FBtr0340018	2863	CG8399	uncharacterized protein
418	chrX	10111744	10111751	8	1-CAAGGTCR-2-chrX	38.3	+	1.79453	Intron (FBtr0110782/FBgn0083940, intron 3 of 6)	10124347	10124445	99	1	FBgn0086045	FBtr0114321	-12596	NA	NA
419	chr2L	14402936	14402943	8	1-CAAGGTCR-1-chr2L	39.2	-	1.7847	Intron (FBtr0080637/FBgn0004858, intron 1 of 2)	14390628	14409549	18922	2	FBgn0004858	FBtr0080637	6606	elB	elbow B
420	chr3R	24260311	24260318	8	1-CAAGGTCR-1-chr3R	38.3	+	1.35784	Promoter (<=1kb)	24252865	24259488	6624	2	FBgn0011225	FBtr0334871	-823	jar	jaguar
421	chr3R	14807011	14807018	8	1-CAAGGTCR-1-chr3R	37.1	+	1.09789	3' UTR	14806543	14811610	5068	2	FBgn0266756	FBtr0334288	4592	btsz	bitesize
422	chr3L	12098794	12098801	8	1-CAAGGTCR-2-chr3L	33.9	-	0.98768	Distal Intergenic	12088626	12089225	600	1	FBgn0036246	FBtr0075990	10168	CG17154	uncharacterized protein
423	chr3L	4103825	4103832	8	1-CAAGGTCR-1-chr3L	40.3	-	0.77539	Promoter (<=1kb)	4103564	4107116	3553	1	FBgn0035498	FBtr0073210	261	Fit1	Fermitin 1
424	chr2L	15005243	15005250	8	1-CAAGGTCR-1-chr2L	37.1	+	0.396046	Promoter (<=1kb)	15005733	15006607	875	1	FBgn0040228	FBtr0080693	-483	DCTN5-p25	Dynactin 5, p25 subunit
425	chr2R	16128395	16128402	8	1-CAAGGTCR-1-chr2R	35.6	-	0.319565	Intron (FBtr0089593/FBgn0086676, intron 1 of 7)	16124981	16138238	13258	1	FBgn0086676	FBtr0089592	3414	spin	spinster
426	chrX	19155255	19155262	8	1-CAAGGTCR-1-chrX	33.9	-	0.0833498	Promoter (1-2kb)	19142113	19153458	11346	2	FBgn0261461	FBtr0299624	-1797	RhoGAP18B	Rho GTPase activating protein at 18B
427	chr3R	11666756	11666763	8	1-CAAGGTCR-1-chr3R	33.1	+	-0.781762	Intron (FBtr0299789/FBgn0259227, intron 1 of 4)	11674221	11674923	703	1	FBgn0037930	FBtr0082423	-7458	CG14715	uncharacterized protein
428	chrX	9476655	9476662	8	1-CAAGGTCR-1-chrX	38.3	-	-0.887026	Intron (FBtr0343369/FBgn0261260, intron 1 of 14)	9359850	9495899	136050	2	FBgn0261260	FBtr0343370	19237	mgl	Megalin
429	chr3R	17948817	17948824	8	1-CAAGGTCR-1-chr3R	36	+	-1.24402	Intron (FBtr0330273/FBgn0263995, intron 2 of 11)	17944106	18018892	74787	1	FBgn0263995	FBtr0330274	4711	cpo	couch potato
430	chr3R	14811379	14811386	8	1-CAAGGTCR-1-chr3R	37.8	+	-1.37801	Promoter (<=1kb)	14806543	14811610	5068	2	FBgn0266756	FBtr0334288	224	btsz	bitesize
431	chr3R	31603427	31603434	8	1-CAAGGTCR-1-chr3R	39.2	+	-1.66821	Intron (FBtr0333328/FBgn0039858, intron 1 of 5)	31598803	31609815	11013	2	FBgn0039858	FBtr0085803	6381	CycG	Cyclin G
432	chr2L	21244170	21244177	8	1-CAAGGTCR-1-chr2L	35.3	-	-1.77876	Intron (FBtr0081478/FBgn0261239, intron 2 of 4)	21238301	21238361	61	1	FBgn0283561	FBtr0445489	5869	NA	NA
433	chr3R	9437868	9437875	8	1-CAAGGTCR-1-chr3R	40.3	-	-2.25906	Promoter (1-2kb)	9436835	9455500	18666	1	FBgn0261552	FBtr0344283	1033	ps	pasilla
434	chrX	11501795	11501802	8	1-CAAGGTCR-1-chrX	36.2	-	-2.39145	Intron (FBtr0301020/FBgn0052666, intron 2 of 5)	11493819	11555045	61227	1	FBgn0052666	FBtr0340295	7976	Drak	Death-associated protein kinase related
435	chr3R	31977858	31977865	8	1-CAAGGTCR-1-chr3R	48.3	+	-2.39899	Promoter (<=1kb)	31978121	31990909	12789	1	FBgn0039886	FBtr0085870	-256	CG2003	uncharacterized protein
436	chr3R	14290513	14290520	8	1-CAAGGTCR-2-chr3R	33.8	-	-2.89962	Promoter (<=1kb)	14290401	14302276	11876	1	FBgn0285913	FBtr0082922	112	red	red Malpighian tubules
437	chr3L	17958912	17958919	8	1-CAAGGTCR-1-chr3L	38.3	-	-3.40186	Promoter (2-3kb)	17953358	17961814	8457	2	FBgn0000568	FBtr0075151	2895	Eip75B	Ecdysone-induced protein 75B
438	chr2L	12542378	12542385	8	1-CAAGGTCR-1-chr2L	34.9	-	-3.41537	Promoter (<=1kb)	12543176	12544343	1168	1	FBgn0261709	FBtr0303215	-791	NA	NA
439	chr3L	14193012	14193019	8	1-CAAGGTCR-1-chr3L	35.3	-	-3.43725	Promoter (2-3kb)	14190873	14233250	42378	1	FBgn0013718	FBtr0100039	2139	nuf	nuclear fallout
440	chr3L	2805930	2805937	8	1-CAAGGTCR-1-chr3L	39.8	-	-3.48173	Intron (FBtr0309120/FBgn0263392, intron 1 of 6)	2786207	2821103	34897	2	FBgn0263392	FBtr0309120	15166	Tet	Ten-Eleven Translocation (TET) family protein
441	chrX	493659	493666	8	1-CAAGGTCR-2-chrX	33.4	+	-3.52077	Promoter (<=1kb)	490787	493495	2709	2	FBgn0023537	FBtr0070092	-164	CG17896	uncharacterized protein
442	chr3R	9889971	9889978	8	1-CAAGGTCR-1-chr3R	36	+	-3.57621	Intron (FBtr0114581/FBgn0267336, intron 1 of 2)	9876998	9878498	1501	2	FBgn0266389	FBtr0344328	-11473	NA	NA
443	chr3R	29148328	29148335	8	1-CAAGGTCR-1-chr3R	45.7	-	-3.58218	Promoter (<=1kb)	29148342	29149901	1560	1	FBgn0014869	FBtr0100483	-7	Pglym78	Phosphoglyceromutase 78
444	chrX	16749561	16749568	8	1-CAAGGTCR-1-chrX	40.3	-	-3.6565	Promoter (2-3kb)	16727304	16751910	24607	2	FBgn0027528	FBtr0074359	2342	goe	gone early
445	chr2R	18828565	18828572	8	1-CAAGGTCR-1-chr2R	48.3	+	-3.70501	Promoter (1-2kb)	18822188	18829699	7512	2	FBgn0034396	FBtr0303237	1127	CG15097	uncharacterized protein
446	chr3L	16977098	16977105	8	1-CAAGGTCR-1-chr3L	33.7	-	-3.97436	Promoter (<=1kb)	16976344	16994388	18045	1	FBgn0261547	FBtr0302650	754	Exn	Ephexin
447	chr3L	17614027	17614034	8	1-CAAGGTCR-2-chr3L	38.3	+	-4.20753	Intron (FBtr0075202/FBgn0000567, intron 1 of 7)	17560158	17619325	59168	2	FBgn0000567	FBtr0075202	5291	Eip74EF	Ecdysone-induced protein 74EF
448	chr3L	17615906	17615913	8	1-CAAGGTCR-2-chr3L	36.7	+	-4.2451	Intron (FBtr0075202/FBgn0000567, intron 1 of 7)	17560158	17619325	59168	2	FBgn0000567	FBtr0075202	3412	Eip74EF	Ecdysone-induced protein 74EF
449	chr3L	12098706	12098713	8	1-CAAGGTCR-1-chr3L	41.8	+	-4.36828	Distal Intergenic	12088626	12089225	600	1	FBgn0036246	FBtr0075990	10080	CG17154	uncharacterized protein
450	chr2L	20084047	20084054	8	1-CAAGGTCR-1-chr2L	39.8	-	-4.58086	Promoter (1-2kb)	20079270	20085070	5801	2	FBgn0263773	FBtr0310560	1016	fok	fledgling of Klp38B
451	chr3R	15088929	15088936	8	1-CAAGGTCR-1-chr3R	36	-	-4.62488	Intron (FBtr0344380/FBgn0038286, intron 1 of 4)	15079320	15095631	16312	2	FBgn0038286	FBtr0344380	6695	CG6966	uncharacterized protein
452	chr3L	18144664	18144671	8	1-CAAGGTCR-2-chr3L	36	+	-5.56062	Intron (FBtr0075126/FBgn0020300, intron 2 of 2)	18148923	18153627	4705	1	FBgn0036780	FBtr0075127	-4252	CG7330	uncharacterized protein
453	chr2R	16127748	16127755	8	1-CAAGGTCR-1-chr2R	35.5	-	-6.43058	Promoter (2-3kb)	16124981	16138238	13258	1	FBgn0086676	FBtr0089592	2767	spin	spinster
454	chr3R	9424641	9424648	8	1-CAAGGTCR-2-chr3R	37.1	-	-7.29395	Intron (FBtr0111027/FBgn0261552, intron 2 of 7)	9428561	9448649	20089	1	FBgn0261552	FBtr0111028	-3913	ps	pasilla
455	chr2L	18641473	18641480	8	1-CAAGGTCR-2-chr2L	33.2	+	-7.4817	Intron (FBtr0081073/FBgn0032694, intron 2 of 3)	18651058	18653010	1953	2	FBgn0032693	FBtr0081077	11530	Cyp310a1	Cyp310a1
456	chr2R	12201313	12201320	8	1-CAAGGTCR-1-chr2R	43.8	-	-7.64555	Promoter (<=1kb)	12199391	12200815	1425	2	FBgn0033699	FBtr0088006	-498	RpS11	Ribosomal protein S11
457	chr2L	21244133	21244140	8	1-CAAGGTCR-2-chr2L	35.1	-	-8.2984	Intron (FBtr0081478/FBgn0261239, intron 2 of 4)	21238301	21238361	61	1	FBgn0283561	FBtr0445489	5832	NA	NA
458	chr2L	16318432	16318439	8	1-CAAGGTCR-1-chr2L	35.3	-	-8.36523	Intron (FBtr0080845/FBgn0000250, intron 4 of 6)	16313097	16325420	12324	2	FBgn0000250	FBtr0080847	6981	cact	cactus
459	chr2R	11648024	11648031	8	1-CAAGGTCR-1-chr2R	48.3	+	-8.46685	Promoter (<=1kb)	11642268	11648514	6247	2	FBgn0033639	FBtr0113068	483	CG9003	uncharacterized protein
460	chr3L	12406916	12406923	8	1-CAAGGTCR-2-chr3L	35.3	+	-8.84233	Promoter (1-2kb)	12403505	12405417	1913	2	FBgn0052103	FBtr0332089	-1499	SCaMC	Short Calcium-binding Mitochondrial Carrier
461	chr3L	19906918	19906925	8	1-CAAGGTCR-1-chr3L	37.8	-	-8.97881	Promoter (2-3kb)	19909365	19910203	839	1	FBgn0264481	FBtr0332770	-2440	NA	NA
462	chr2R	18673001	18673008	8	1-CAAGGTCR-2-chr2R	33.8	+	-9.40872	Promoter (<=1kb)	18667527	18673536	6010	2	FBgn0023214	FBtr0086652	528	edl	ETS-domain lacking
463	chrX	11501801	11501808	8	1-CAAGGTCR-2-chrX	33.4	-	-9.7868	Intron (FBtr0301020/FBgn0052666, intron 2 of 5)	11493819	11555045	61227	1	FBgn0052666	FBtr0340295	7982	Drak	Death-associated protein kinase related
464	chr3R	26319162	26319169	8	1-CAAGGTCR-1-chr3R	48.3	+	-9.85419	Promoter (<=1kb)	26318355	26362588	44234	1	FBgn0053970	FBtr0346107	807	CG33970	uncharacterized protein
465	chr3L	18796035	18796042	8	1-CAAGGTCR-1-chr3L	45.7	-	-10.5473	Intron (FBtr0075086/FBgn0001078, intron 2 of 9)	18751749	18801309	49561	2	FBgn0001078	FBtr0075086	5267	ftz-f1	ftz transcription factor 1
466	chr3R	21658021	21658028	8	1-CAAGGTCR-1-chr3R	38.8	+	-11.3386	Promoter (2-3kb)	21621368	21660432	39065	2	FBgn0011766	FBtr0084117	2404	E2f1	E2F transcription factor 1
467	chr2L	5090275	5090282	8	1-CAAGGTCR-1-chr2L	35.6	+	-11.5728	Intron (FBtr0079026/FBgn0031681, intron 2 of 9)	5072170	5093592	21423	2	FBgn0031681	FBtr0079026	3310	Pgant5	Polypeptide N-Acetylgalactosaminyltransferase 5
468	chr2R	16215333	16215340	8	1-CAAGGTCR-1-chr2R	35.6	+	-11.6822	Intron (FBtr0087193/FBgn0034091, intron 1 of 5)	16219374	16219445	72	2	FBgn0050238	FBtr0087197	4105	NA	NA
469	chrX	5897833	5897840	8	1-CAAGGTCR-1-chrX	48.3	-	-12.2933	Promoter (2-3kb)	5882480	5899989	17510	2	FBgn0267228	FBtr0346401	2149	NA	NA
470	chr3L	8675007	8675014	8	1-CAAGGTCR-1-chr3L	41.8	-	-12.3892	Promoter (<=1kb)	8675759	8679253	3495	1	FBgn0001168	FBtr0100153	-745	h	hairy
471	chr3R	31604794	31604801	8	1-CAAGGTCR-1-chr3R	45.7	+	-12.691	Intron (FBtr0333328/FBgn0039858, intron 1 of 5)	31598803	31609815	11013	2	FBgn0039858	FBtr0085803	5014	CycG	Cyclin G
472	chr2R	10533605	10533612	8	1-CAAGGTCR-1-chr2R	37.5	-	-13.1078	Promoter (<=1kb)	10504859	10534354	29496	2	FBgn0283521	FBtr0089343	742	lola	longitudinals lacking
473	chr3L	8725739	8725746	8	1-CAAGGTCR-1-chr3L	38.3	-	-13.2712	Promoter (<=1kb)	8725520	8725774	255	2	FBgn0264696	FBtr0333890	28	CG43965	uncharacterized protein
474	chr2L	6086887	6086894	8	1-CAAGGTCR-2-chr2L	33.4	+	-13.3076	Intron (FBtr0344437/FBgn0266450, intron 1 of 3)	6082603	6096498	13896	1	FBgn0266450	FBtr0344437	4284	Kr-h1	Kruppel homolog 1
475	chr3R	30189406	30189413	8	1-CAAGGTCR-1-chr3R	35.6	-	-14.0012	Promoter (1-2kb)	30185423	30191072	5650	2	FBgn0039754	FBtr0085573	1659	CG9747	uncharacterized protein
476	chr2R	14344013	14344020	8	1-CAAGGTCR-2-chr2R	40.3	-	-14.2762	Promoter (1-2kb)	14342062	14351802	9741	1	FBgn0085408	FBtr0112616	1951	Shrm	Shroom
477	chr3R	21658422	21658429	8	1-CAAGGTCR-1-chr3R	38.8	+	-14.4858	Promoter (2-3kb)	21621368	21660432	39065	2	FBgn0011766	FBtr0084117	2003	E2f1	E2F transcription factor 1
478	chr3L	15539954	15539961	8	1-CAAGGTCR-2-chr3L	33.4	-	-14.8814	Intron (FBtr0075557/FBgn0004396, intron 1 of 5)	15535395	15553214	17820	1	FBgn0004396	FBtr0075558	4559	CrebA	Cyclic-AMP response element binding protein A
479	chrX	6855192	6855199	8	1-CAAGGTCR-1-chrX	41.8	-	-15.5315	Promoter (2-3kb)	6851909	6852895	987	2	FBgn0029915	FBtr0343322	-2297	CG14434	uncharacterized protein
480	chrX	15132379	15132386	8	1-CAAGGTCR-1-chrX	38.8	+	-15.7854	Intron (FBtr0100009/FBgn0260006, intron 2 of 8)	15125753	15137311	11559	1	FBgn0260006	FBtr0100009	6626	drd	drop dead
481	chr3L	17613894	17613901	8	1-CAAGGTCR-1-chr3L	48.3	+	-16.5567	Intron (FBtr0075202/FBgn0000567, intron 1 of 7)	17560158	17619325	59168	2	FBgn0000567	FBtr0075202	5424	Eip74EF	Ecdysone-induced protein 74EF
482	chrX	493653	493660	8	1-CAAGGTCR-1-chrX	33.4	+	-16.6002	Promoter (<=1kb)	490787	493495	2709	2	FBgn0023537	FBtr0070092	-158	CG17896	uncharacterized protein
483	chr3L	17964897	17964904	8	1-CAAGGTCR-1-chr3L	34.6	+	-17.029	Intron (FBtr0306814/FBgn0000568, intron 5 of 7)	17953358	17961814	8457	2	FBgn0000568	FBtr0075151	-3083	Eip75B	Ecdysone-induced protein 75B
484	chr3R	18385296	18385303	8	1-CAAGGTCR-2-chr3R	33.7	+	-18.0174	Promoter (<=1kb)	18381580	18385072	3493	2	FBgn0038611	FBtr0083580	-224	CG14309	uncharacterized protein
485	chr2L	7436908	7436915	8	1-CAAGGTCR-1-chr2L	37.5	-	-18.1383	Promoter (<=1kb)	7437492	7445269	7778	1	FBgn0031914	FBtr0079446	-577	CG5973	uncharacterized protein
486	chr3L	18782049	18782056	8	1-CAAGGTCR-1-chr3L	36.5	+	-18.3906	Intron (FBtr0075086/FBgn0001078, intron 2 of 9)	18750607	18765744	15138	2	FBgn0001078	FBtr0347045	-16305	ftz-f1	ftz transcription factor 1
487	chr3L	1890478	1890485	8	1-CAAGGTCR-2-chr3L	38.3	-	-18.8083	Promoter (<=1kb)	1889490	1891462	1973	1	FBgn0262624	FBtr0072837	988	Tmhs	Tetraspan membrane protein in hair cell stereocilia
488	chr3R	28683646	28683653	8	1-CAAGGTCR-1-chr3R	33.2	-	-18.851	Promoter (1-2kb)	28682341	28695939	13599	1	FBgn0039594	FBtr0305088	1305	snu	snustorr
489	chr3L	14556480	14556487	8	1-CAAGGTCR-1-chr3L	37.1	-	-19.0168	Distal Intergenic	14560000	14562613	2614	1	FBgn0054039	FBtr0301014	-3513	CG34039	uncharacterized protein
490	chr3R	12689127	12689134	8	1-CAAGGTCR-1-chr3R	43.8	+	-19.8537	Promoter (<=1kb)	12682186	12689367	7182	2	FBgn0001296	FBtr0082666	233	kar	karmoisin
491	chr2L	6088523	6088530	8	1-CAAGGTCR-1-chr2L	35.5	+	-20.2199	Promoter (2-3kb)	6091412	6096498	5087	1	FBgn0266445	FBtr0344439	-2882	CG45075	uncharacterized protein
492	chr3L	2574883	2574890	8	1-CAAGGTCR-1-chr3L	33.1	-	-23.5683	Intron (FBtr0072956/FBgn0010909, intron 3 of 18)	2555774	2586254	30481	2	FBgn0010909	FBtr0333362	11364	msn	misshapen
493	chr3R	13977871	13977878	8	1-CAAGGTCR-1-chr3R	42.7	+	-24.6541	Intron (FBtr0100361/FBgn0264493, intron 1 of 7)	13967955	13983363	15409	2	FBgn0264493	FBtr0100361	5485	rdx	roadkill
494	chr2L	2908154	2908161	8	1-CAAGGTCR-1-chr2L	35.1	+	-24.9109	Intron (FBtr0077632/FBgn0041111, intron 2 of 12)	2890171	2953077	62907	1	FBgn0041111	FBtr0290041	17983	lilli	lilliputian
495	chr3R	24565691	24565698	8	1-CAAGGTCR-1-chr3R	48.3	+	-24.9983	Intron (FBtr0084672/FBgn0039209, intron 2 of 4)	24559789	24571965	12177	2	FBgn0039209	FBtr0345204	6267	REPTOR	Repressed by TOR
496	chr3L	7347263	7347270	8	1-CAAGGTCR-1-chr3L	41.2	+	-26.4214	Promoter (<=1kb)	7345698	7347123	1426	2	FBgn0035768	FBtr0076880	-140	CG14834	uncharacterized protein
497	chrX	21368434	21368441	8	1-CAAGGTCR-2-chrX	37.1	+	-26.9439	Promoter (<=1kb)	21368614	21373145	4532	1	FBgn0024251	FBtr0331745	-173	bbx	bobby sox
498	chr3R	6210093	6210100	8	1-CAAGGTCR-1-chr3R	43.8	-	-28.8074	Promoter (<=1kb)	6209373	6213493	4121	1	FBgn0037410	FBtr0310413	720	Osi2	Osiris 2
499	chrX	20507628	20507635	8	1-CAAGGTCR-2-chrX	34.3	-	-31.2333	Intron (FBtr0301537/FBgn0031118, intron 2 of 14)	20469955	20510694	40740	2	FBgn0031118	FBtr0301537	3059	RhoGAP19D	Rho GTPase activating protein at 19D
500	chr3R	16201424	16201431	8	1-CAAGGTCR-1-chr3R	41.8	+	-35.6634	Promoter (1-2kb)	16198000	16203083	5084	2	FBgn0038407	FBtr0083278	1652	CG6126	uncharacterized protein
501	chr2R	18672764	18672771	8	1-CAAGGTCR-1-chr2R	36.5	+	-37.4903	Promoter (<=1kb)	18667527	18673536	6010	2	FBgn0023214	FBtr0086652	765	edl	ETS-domain lacking
502	chr3R	15293352	15293359	8	1-CAAGGTCR-1-chr3R	33.7	+	-37.9557	Promoter (2-3kb)	15290946	15308779	17834	1	FBgn0003721	FBtr0333917	2406	Tm1	Tropomyosin 1
503	chr2L	7418387	7418394	8	1-CAAGGTCR-1-chr2L	35.1	+	-38.2022	Intron (FBtr0079443/FBgn0028387, intron 5 of 7)	7423820	7425932	2113	1	FBgn0264439	FBtr0332524	-5426	NA	NA
504	chr3L	3149189	3149196	8	1-CAAGGTCR-2-chr3L	33.4	+	-39.7551	Promoter (<=1kb)	3149133	3154934	5802	1	FBgn0263108	FBtr0307305	56	BtbVII	BTB-protein-VII
505	chr2L	7418588	7418595	8	1-CAAGGTCR-2-chr2L	34.7	-	-40.1298	Intron (FBtr0079443/FBgn0028387, intron 5 of 7)	7423820	7425932	2113	1	FBgn0264439	FBtr0332524	-5225	NA	NA
506	chr3L	9064666	9064673	8	1-CAAGGTCR-1-chr3L	38	-	-46.6713	Promoter (1-2kb)	9048880	9066027	17148	2	FBgn0000116	FBtr0076543	1354	Argk	Arginine kinase

## Sheet: Replicate 3
motif_num	motif_chrom	motif_start	motif_end	motif_length	motif_name	-10*log10pVal	motif_strand	log-odds_score	motif_location	gene_start	gene_end	gene_length	gene_strand	gene_ID	transcript_ID	distanceToTSS	gene_sympol	gene_name
1	chr3L	8725372	8725382	11	1-TGACCTTGAVH-1-chr3L	37.9	+	1877.31	Promoter (<=1kb)	8725520	8725774	255	2	FBgn0264696	FBtr0333890	392	CG43965	uncharacterized protein
2	chr3R	19449588	19449598	11	1-TGACCTTGAVH-1-chr3R	34.4	+	929.963	Intron (FBtr0083763/FBgn0051221, intron 3 of 4)	19461085	19597288	136204	1	FBgn0260003	FBtr0110917	-11487	Dys	Dystrophin
3	chrX	8473752	8473762	11	1-TGACCTTGAVH-1-chrX	34.7	+	311.142	Promoter (<=1kb)	8473837	8476071	2235	1	FBgn0014465	FBtr0071201	-75	Cp7Fb	Chorion protein b at 7F
4	chr2R	17392589	17392599	11	1-TGACCTTGAVH-1-chr2R	43	-	206.877	Promoter (<=1kb)	17392215	17392286	72	1	FBgn0011879	FBtr0086908	374	NA	NA
5	chrX	8476893	8476903	11	1-TGACCTTGAVH-1-chrX	37.3	+	202.444	Promoter (<=1kb)	8477117	8478320	1204	1	FBgn0014466	FBtr0071202	-214	Cp7Fc	Chorion protein c at 7F
6	chr3R	8109201	8109211	11	1-TGACCTTGAVH-1-chr3R	46.3	-	120.666	Promoter (2-3kb)	8106488	8122294	15807	1	FBgn0243512	FBtr0339722	2713	puc	puckered
7	chrX	12006921	12006931	11	1-TGACCTTGAVH-1-chrX	45.6	+	117.061	Promoter (<=1kb)	12007176	12009904	2729	1	FBgn0030360	FBtr0073574	-245	CG1806	uncharacterized protein
8	chrX	14952290	14952300	11	1-TGACCTTGAVH-1-chrX	48.3	-	116.058	Promoter (<=1kb)	14933670	14952009	18340	2	FBgn0027601	FBtr0303294	-281	pdgy	pudgy
9	chrX	7873926	7873936	11	1-TGACCTTGAVH-1-chrX	39.2	-	99.9943	Promoter (<=1kb)	7874394	7876847	2454	1	FBgn0029966	FBtr0071087	-458	Ir7c	Ionotropic receptor 7c
10	chr2L	21250984	21250994	11	1-TGACCTTGAVH-2-chr2L	40.6	-	95.3985	Intron (FBtr0081478/FBgn0261239, intron 2 of 4)	21261168	21262287	1120	1	FBgn0021856	FBtr0081482	-10174	l(2)k14505	lethal (2) k14505
11	chr2R	8670395	8670405	11	1-TGACCTTGAVH-1-chr2R	35.4	-	83.0041	Promoter (<=1kb)	8670723	8682791	12069	1	FBgn0263120	FBtr0100428	-318	Acsl	Acyl-CoA synthetase long-chain
12	chrX	3673047	3673057	11	1-TGACCTTGAVH-1-chrX	59	-	81.147	Promoter (1-2kb)	3671801	3700780	28980	1	FBgn0023215	FBtr0301821	1246	Mnt	Mnt
13	chrX	12756553	12756563	11	1-TGACCTTGAVH-2-chrX	33.2	+	80.6201	Downstream (<1kb)	12757036	12760617	3582	2	FBgn0020513	FBtr0333799	4054	Paics	PAICS bifunctional enzyme
14	chr3R	18741426	18741436	11	1-TGACCTTGAVH-1-chr3R	38.9	+	78.5984	Promoter (1-2kb)	18733106	18740096	6991	2	FBgn0024329	FBtr0331353	-1330	Mekk1	Mekk1
15	chr2L	21251018	21251028	11	1-TGACCTTGAVH-1-chr2L	47	-	78.039	Intron (FBtr0081478/FBgn0261239, intron 2 of 4)	21261168	21262287	1120	1	FBgn0021856	FBtr0081482	-10140	l(2)k14505	lethal (2) k14505
16	chr2R	15613657	15613667	11	1-TGACCTTGAVH-1-chr2R	40.9	+	75.9582	Promoter (<=1kb)	15613854	15650310	36457	1	FBgn0260429	FBtr0300853	-187	CG42524	uncharacterized protein
17	chr2R	23871037	23871047	11	1-TGACCTTGAVH-1-chr2R	54.5	-	75.154	Promoter (<=1kb)	23870273	23877442	7170	1	FBgn0011236	FBtr0072129	764	ken	ken and barbie
18	chrX	19175300	19175310	11	1-TGACCTTGAVH-1-chrX	40.9	+	72.6036	Promoter (<=1kb)	19171077	19174900	3824	2	FBgn0047095	FBtr0347285	-400	CG33939	uncharacterized protein
19	chr3R	10087344	10087354	11	1-TGACCTTGAVH-1-chr3R	49.6	-	68.9293	Intron (FBtr0344594/FBgn0266414, intron 1 of 1)	10091126	10091217	92	1	FBgn0262378	FBtr0304217	-3772	NA	NA
20	chrX	12756513	12756523	11	1-TGACCTTGAVH-1-chrX	39.4	+	68.2351	Downstream (<1kb)	12757036	12760617	3582	2	FBgn0020513	FBtr0333799	4094	Paics	PAICS bifunctional enzyme
21	chr2R	16786035	16786045	11	1-TGACCTTGAVH-2-chr2R	37.9	-	66.8311	Promoter (1-2kb)	16787175	16792472	5298	1	FBgn0034158	FBtr0087030	-1130	CG5522	uncharacterized protein
22	chr3R	14024593	14024603	11	1-TGACCTTGAVH-1-chr3R	38.7	-	66.4941	Promoter (1-2kb)	13967955	14025962	58008	2	FBgn0264493	FBtr0301634	1359	rdx	roadkill
23	chr3L	3149262	3149272	11	1-TGACCTTGAVH-1-chr3L	43.3	-	66.2457	Promoter (<=1kb)	3149133	3154934	5802	1	FBgn0263108	FBtr0307305	129	BtbVII	BTB-protein-VII
24	chr3L	3124759	3124769	11	1-TGACCTTGAVH-1-chr3L	40.5	-	64.5725	Promoter (1-2kb)	3115748	3123165	7418	2	FBgn0026189	FBtr0333895	-1594	prominin-like	prominin-like
25	chr2L	5547164	5547174	11	1-TGACCTTGAVH-1-chr2L	42.6	-	62.9295	Promoter (<=1kb)	5547203	5549279	2077	1	FBgn0031717	FBtr0307062	-29	Oscillin	oscillin
26	chr3L	21516763	21516773	11	1-TGACCTTGAVH-1-chr3L	43.4	+	62.0828	Promoter (<=1kb)	21517187	21522156	4970	1	FBgn0037093	FBtr0332716	-414	Cdk12	Cyclin-dependent kinase 12
27	chr3L	2272843	2272853	11	1-TGACCTTGAVH-1-chr3L	35.8	-	60.423	Promoter (<=1kb)	2269881	2272769	2889	2	FBgn0041709	FBtr0072902	-74	yellow-g	yellow-g
28	chr2L	2904965	2904975	11	1-TGACCTTGAVH-1-chr2L	45.8	-	60.3656	Intron (FBtr0077632/FBgn0041111, intron 2 of 12)	2890171	2953077	62907	1	FBgn0041111	FBtr0290041	14794	lilli	lilliputian
29	chr3L	9064850	9064860	11	1-TGACCTTGAVH-2-chr3L	37.6	-	59.4368	Promoter (1-2kb)	9048880	9066027	17148	2	FBgn0000116	FBtr0076543	1167	Argk	Arginine kinase
30	chrX	6855192	6855202	11	1-TGACCTTGAVH-1-chrX	44.4	+	56.0868	Promoter (2-3kb)	6851909	6852895	987	2	FBgn0029915	FBtr0343322	-2297	CG14434	uncharacterized protein
31	chr2R	23871280	23871290	11	1-TGACCTTGAVH-1-chr2R	43	+	55.6669	Promoter (1-2kb)	23870273	23877442	7170	1	FBgn0011236	FBtr0072129	1007	ken	ken and barbie
32	chr3R	22368511	22368521	11	1-TGACCTTGAVH-1-chr3R	61.5	-	54.2861	Promoter (<=1kb)	22369282	22372746	3465	1	FBgn0267385	FBtr0084214	-761	PyK	Pyruvate kinase
33	chr3R	29900113	29900123	11	1-TGACCTTGAVH-1-chr3R	49.3	+	53.7755	Intron (FBtr0085494/FBgn0051038, intron 3 of 3)	29903240	29903825	586	2	FBgn0039718	FBtr0085515	3702	CG15517	uncharacterized protein
34	chr3L	18781867	18781877	11	1-TGACCTTGAVH-1-chr3L	38.1	+	53.5494	Intron (FBtr0075086/FBgn0001078, intron 2 of 9)	18750607	18765744	15138	2	FBgn0001078	FBtr0347045	-16123	ftz-f1	ftz transcription factor 1
35	chr3L	18063304	18063314	11	1-TGACCTTGAVH-1-chr3L	38.1	+	50.4907	Promoter (1-2kb)	17950953	18064696	113744	2	FBgn0000568	FBtr0306814	1382	Eip75B	Ecdysone-induced protein 75B
36	chrX	13634257	13634267	11	1-TGACCTTGAVH-1-chrX	46.7	-	49.2239	Intron (FBtr0073808/FBgn0030505, intron 1 of 9)	13642175	13663657	21483	1	FBgn0030505	FBtr0345127	-7908	NFAT	NFAT nuclear factor
37	chr2R	11648743	11648753	11	1-TGACCTTGAVH-1-chr2R	33.2	+	49.0838	Promoter (<=1kb)	11642268	11648514	6247	2	FBgn0033639	FBtr0113068	-229	CG9003	uncharacterized protein
38	chr3L	2255516	2255526	11	1-TGACCTTGAVH-1-chr3L	39.7	-	48.8565	Promoter (<=1kb)	2252744	2256010	3267	2	FBgn0035321	FBtr0072907	484	CG1275	uncharacterized protein
39	chrX	12970455	12970465	11	1-TGACCTTGAVH-1-chrX	42.4	-	47.8524	Promoter (<=1kb)	12970711	12973967	3257	1	FBgn0030438	FBtr0305600	-246	CG15721	uncharacterized protein
40	chrX	12583189	12583199	11	1-TGACCTTGAVH-1-chrX	48.4	+	46.8162	Promoter (<=1kb)	12569169	12583193	14025	2	FBgn0030400	FBtr0331718	0	Pits	Protein interacting with Ttk69 and Sin3A
41	chr2L	16716707	16716717	11	1-TGACCTTGAVH-1-chr2L	39.6	-	46.7384	Promoter (<=1kb)	16704286	16716195	11910	2	FBgn0062978	FBtr0303445	-512	CG31808	uncharacterized protein
42	chr3L	18818589	18818599	11	1-TGACCTTGAVH-2-chr3L	38.1	-	45.8945	Promoter (2-3kb)	18802265	18820675	18411	2	FBgn0036814	FBtr0075084	2076	CG14073	uncharacterized protein
43	chr2R	21077388	21077398	11	1-TGACCTTGAVH-1-chr2R	40.1	-	45.5676	Promoter (<=1kb)	21076840	21088226	11387	1	FBgn0003748	FBtr0071537	548	Treh	Trehalase
44	chr2L	10515078	10515088	11	1-TGACCTTGAVH-1-chr2L	48.8	+	45.2941	Promoter (1-2kb)	10511253	10516668	5416	2	FBgn0267828	FBtr0347403	1580	Fatp1	Fatty acid transport protein 1
45	chr3L	6264151	6264161	11	1-TGACCTTGAVH-1-chr3L	46.5	-	44.9679	Promoter (<=1kb)	6263008	6263399	392	2	FBgn0265715	FBtr0340648	-752	NA	NA
46	chr2L	72350	72360	11	1-TGACCTTGAVH-1-chr2L	33.1	+	44.8048	Promoter (<=1kb)	72387	76211	3825	1	FBgn0031213	FBtr0078101	-27	galectin	galectin
47	chr3R	13014913	13014923	11	1-TGACCTTGAVH-1-chr3R	45.4	-	42.4792	Promoter (2-3kb)	13017161	13021717	4557	1	FBgn0020496	FBtr0082701	-2238	CtBP	C-terminal Binding Protein
48	chr2R	15379095	15379105	11	1-TGACCTTGAVH-1-chr2R	34.8	+	42.2537	Promoter (1-2kb)	15376619	15380614	3996	2	FBgn0000996	FBtr0339999	1509	dup	double parked
49	chr2R	6158898	6158908	11	1-TGACCTTGAVH-1-chr2R	52.3	+	42.0661	Promoter (<=1kb)	6158597	6159635	1039	1	FBgn0264505	FBtr0344875	301	NA	NA
50	chrX	13752839	13752849	11	1-TGACCTTGAVH-1-chrX	58.1	-	41.9028	Promoter (2-3kb)	13755322	13756013	692	1	FBgn0264381	FBtr0332276	-2473	NA	NA
51	chr3L	4239863	4239873	11	1-TGACCTTGAVH-1-chr3L	48.1	-	41.2615	Promoter (<=1kb)	4240173	4242603	2431	1	FBgn0035515	FBtr0073225	-300	CG14997	uncharacterized protein
52	chr2R	17638239	17638249	11	1-TGACCTTGAVH-2-chr2R	35.4	+	41.2061	Promoter (<=1kb)	17604951	17639138	34188	2	FBgn0034253	FBtr0086895	889	CG10936	uncharacterized protein
53	chrX	18370874	18370884	11	1-TGACCTTGAVH-1-chrX	37.3	-	41.0819	Promoter (<=1kb)	18370897	18374096	3200	1	FBgn0265784	FBtr0308232	-13	CrebB	Cyclic-AMP response element binding protein B
54	chr3L	4824644	4824654	11	1-TGACCTTGAVH-1-chr3L	43.6	-	40.872	Promoter (1-2kb)	4807368	4825687	18320	2	FBgn0261797	FBtr0332745	1033	Dhc64C	Dynein heavy chain 64C
55	chr2R	8145790	8145800	11	1-TGACCTTGAVH-1-chr2R	43	+	40.3582	Promoter (<=1kb)	8136986	8145981	8996	2	FBgn0263593	FBtr0113055	181	Lpin	Lipin
56	chr2R	17638245	17638255	11	1-TGACCTTGAVH-1-chr2R	43.1	+	39.1059	Promoter (<=1kb)	17604951	17639138	34188	2	FBgn0034253	FBtr0086895	883	CG10936	uncharacterized protein
57	chr2L	15912600	15912610	11	1-TGACCTTGAVH-1-chr2L	42.7	-	39.0982	Promoter (<=1kb)	15912558	15913109	552	1	FBgn0266162	FBtr0343724	42	NA	NA
58	chr3L	8682305	8682315	11	1-TGACCTTGAVH-2-chr3L	36.7	-	39.0785	Distal Intergenic	8675955	8679253	3299	1	FBgn0001168	FBtr0076569	6350	h	hairy
59	chr3R	31603333	31603343	11	1-TGACCTTGAVH-1-chr3R	39.8	+	38.7854	Intron (FBtr0333328/FBgn0039858, intron 1 of 5)	31598803	31609815	11013	2	FBgn0039858	FBtr0085803	6472	CycG	Cyclin G
60	chr3L	21034686	21034696	11	1-TGACCTTGAVH-1-chr3L	39.6	-	38.131	Promoter (<=1kb)	21034535	21075444	40910	1	FBgn0026179	FBtr0078289	151	siz	schizo
61	chr2L	2908943	2908953	11	1-TGACCTTGAVH-1-chr2L	40.3	-	36.8622	Intron (FBtr0077632/FBgn0041111, intron 2 of 12)	2890171	2953077	62907	1	FBgn0041111	FBtr0290041	18772	lilli	lilliputian
62	chr2L	14599582	14599592	11	1-TGACCTTGAVH-1-chr2L	41.1	-	36.6028	Promoter (<=1kb)	14599674	14599745	72	1	FBgn0028910	FBtr0080647	-82	NA	NA
63	chr3R	31709022	31709032	11	1-TGACCTTGAVH-1-chr3R	56.8	-	36.1979	Promoter (<=1kb)	31709275	31709788	514	1	FBgn0054046	FBtr0308935	-243	NA	NA
64	chrX	21368496	21368506	11	1-TGACCTTGAVH-1-chrX	54.5	+	35.8428	Promoter (<=1kb)	21368614	21373145	4532	1	FBgn0024251	FBtr0331745	-108	bbx	bobby sox
65	chr3L	3069899	3069909	11	1-TGACCTTGAVH-1-chr3L	39.6	-	35.8138	Promoter (<=1kb)	3055908	3070839	14932	2	FBgn0266918	FBtr0073004	930	CG32486	uncharacterized protein
66	chr3R	26261555	26261565	11	1-TGACCTTGAVH-1-chr3R	36.7	-	35.0955	Promoter (<=1kb)	26254069	26261591	7523	2	FBgn0000064	FBtr0084994	26	Ald1	Aldolase 1
67	chr3L	19906359	19906369	11	1-TGACCTTGAVH-1-chr3L	51.1	+	34.6643	Promoter (2-3kb)	19909365	19910203	839	1	FBgn0264481	FBtr0332770	-2996	NA	NA
68	chr2R	23979879	23979889	11	1-TGACCTTGAVH-1-chr2R	36.8	+	34.6564	Promoter (<=1kb)	23979895	23985177	5283	1	FBgn0005612	FBtr0072158	-6	Sox14	Sox box protein 14
69	chrX	18683189	18683199	11	1-TGACCTTGAVH-1-chrX	43.4	+	34.323	Promoter (<=1kb)	18682143	18683303	1161	2	FBgn0265918	FBtr0342847	104	NA	NA
70	chr3L	8682252	8682262	11	1-TGACCTTGAVH-1-chr3L	42.6	+	34.3212	Distal Intergenic	8675955	8679253	3299	1	FBgn0001168	FBtr0076569	6297	h	hairy
71	chr3L	17614303	17614313	11	1-TGACCTTGAVH-1-chr3L	38.7	-	33.6299	Intron (FBtr0075202/FBgn0000567, intron 1 of 7)	17560158	17619325	59168	2	FBgn0000567	FBtr0075202	5012	Eip74EF	Ecdysone-induced protein 74EF
72	chr3L	17924407	17924417	11	1-TGACCTTGAVH-1-chr3L	34	-	33.5599	Distal Intergenic	17934032	17935572	1541	1	FBgn0267794	FBtr0347291	-9615	NA	NA
73	chr2R	10865410	10865420	11	1-TGACCTTGAVH-1-chr2R	37.8	-	33.3182	Intron (FBtr0088242/FBgn0050015, intron 1 of 7)	10839102	10861381	22280	2	FBgn0050015	FBtr0331938	-4029	CG30015	uncharacterized protein
74	chr3L	18029754	18029764	11	1-TGACCTTGAVH-1-chr3L	47	-	33.1392	Intron (FBtr0306814/FBgn0000568, intron 3 of 7)	17953358	18026032	72675	2	FBgn0000568	FBtr0347013	-3722	Eip75B	Ecdysone-induced protein 75B
75	chr2R	6713696	6713706	11	1-TGACCTTGAVH-1-chr2R	35.4	-	32.9658	Promoter (1-2kb)	6700221	6712284	12064	2	FBgn0266525	FBtr0344560	-1412	CG45092	uncharacterized protein
76	chrX	12724585	12724595	11	1-TGACCTTGAVH-1-chrX	37.5	+	32.6243	Intron (FBtr0333767/FBgn0265523, intron 2 of 9)	12717624	12718460	837	2	FBgn0264678	FBtr0333775	-6125	NA	NA
77	chr2R	18672761	18672771	11	1-TGACCTTGAVH-1-chr2R	35	-	32.4709	Promoter (<=1kb)	18667527	18673536	6010	2	FBgn0023214	FBtr0086652	765	edl	ETS-domain lacking
78	chr3L	20123227	20123237	11	1-TGACCTTGAVH-2-chr3L	36.8	-	32.3967	Downstream (1-2kb)	20124298	20126502	2205	2	FBgn0036939	FBtr0332700	3265	CG7365	uncharacterized protein
79	chr3R	16201421	16201431	11	1-TGACCTTGAVH-1-chr3R	44.4	-	32.1988	Promoter (1-2kb)	16198000	16203083	5084	2	FBgn0038407	FBtr0083278	1652	CG6126	uncharacterized protein
80	chr3L	3124815	3124825	11	1-TGACCTTGAVH-2-chr3L	36	-	32.0985	Promoter (1-2kb)	3115748	3123165	7418	2	FBgn0026189	FBtr0333895	-1650	prominin-like	prominin-like
81	chrX	6302260	6302270	11	1-TGACCTTGAVH-1-chrX	43	-	31.8018	Promoter (<=1kb)	6299054	6301285	2232	2	FBgn0043796	FBtr0070925	-975	CG12219	uncharacterized protein
82	chrX	8482652	8482662	11	1-TGACCTTGAVH-1-chrX	40.3	-	31.6632	Promoter (<=1kb)	8481837	8483311	1475	1	FBgn0000360	FBtr0300448	815	Cp38	Chorion protein 38
83	chrX	10111808	10111818	11	1-TGACCTTGAVH-1-chrX	38.2	-	31.6116	Intron (FBtr0110782/FBgn0083940, intron 3 of 6)	10124347	10124445	99	1	FBgn0086045	FBtr0114321	-12529	NA	NA
84	chr3R	14711450	14711460	11	1-TGACCTTGAVH-1-chr3R	47.6	+	31.426	Intron (FBtr0344383/FBgn0262127, intron 1 of 8)	14697689	14724261	26573	2	FBgn0262127	FBtr0344383	12801	kibra	kibra
85	chr3R	10116071	10116081	11	1-TGACCTTGAVH-1-chr3R	42.1	-	31.2527	Intron (FBtr0344391/FBgn0037788, intron 1 of 3)	10112546	10120081	7536	1	FBgn0037788	FBtr0344392	3525	CAH7	Carbonic anhydrase 7
86	chrX	11514266	11514276	11	1-TGACCTTGAVH-1-chrX	37.7	+	30.946	Intron (FBtr0301020/FBgn0052666, intron 2 of 5)	11493819	11555045	61227	1	FBgn0052666	FBtr0340295	20447	Drak	Death-associated protein kinase related
87	chr2R	24611653	24611663	11	1-TGACCTTGAVH-1-chr2R	39.6	+	30.5528	Promoter (<=1kb)	24611703	24613906	2204	1	FBgn0035039	FBtr0072320	-40	Adck	aarF domain containing kinase
88	chrX	9035116	9035126	11	1-TGACCTTGAVH-1-chrX	37.7	-	30.5097	Intron (FBtr0302905/FBgn0259734, intron 1 of 6)	9039675	9053319	13645	1	FBgn0259734	FBtr0300001	-4549	Nost	Nostrin
89	chr2R	13897174	13897184	11	1-TGACCTTGAVH-1-chr2R	45	-	30.447	Promoter (<=1kb)	13864237	13897701	33465	2	FBgn0013733	FBtr0304851	517	shot	short stop
90	chr3R	10087338	10087348	11	1-TGACCTTGAVH-2-chr3R	37.7	-	30.1187	Intron (FBtr0344594/FBgn0266414, intron 1 of 1)	10091126	10091217	92	1	FBgn0262378	FBtr0304217	-3778	NA	NA
91	chr3L	17616883	17616893	11	1-TGACCTTGAVH-1-chr3L	38.3	-	29.8449	Promoter (2-3kb)	17560158	17619325	59168	2	FBgn0000567	FBtr0075202	2432	Eip74EF	Ecdysone-induced protein 74EF
92	chr2R	8671542	8671552	11	1-TGACCTTGAVH-2-chr2R	35.6	+	29.2811	Promoter (<=1kb)	8672056	8682791	10736	1	FBgn0263120	FBtr0100429	-504	Acsl	Acyl-CoA synthetase long-chain
93	chr3L	11819635	11819645	11	1-TGACCTTGAVH-1-chr3L	51.8	+	29.1486	Promoter (<=1kb)	11816983	11819956	2974	2	FBgn0036211	FBtr0076079	311	CG5946	uncharacterized protein
94	chr2L	9231209	9231219	11	1-TGACCTTGAVH-1-chr2L	39.8	+	29.1118	Intron (FBtr0303871/FBgn0041092, intron 2 of 13)	9236521	9236594	74	2	FBgn0051885	FBtr0079820	5375	NA	NA
95	chr2R	22902958	22902968	11	1-TGACCTTGAVH-2-chr2R	40	-	28.9852	Intron (FBtr0071942/FBgn0034797, intron 1 of 10)	22896174	22916719	20546	1	FBgn0034797	FBtr0304795	6784	nahoda	nahoda
96	chr3L	15242985	15242995	11	1-TGACCTTGAVH-2-chr3L	39.8	-	28.7499	Distal Intergenic	15235619	15242832	7214	1	FBgn0029114	FBtr0075607	7366	Tollo	tollo
97	chr2L	9508718	9508728	11	1-TGACCTTGAVH-1-chr2L	46.3	+	28.7442	Intron (FBtr0089853/FBgn0032120, intron 2 of 14)	9521210	9540045	18836	1	FBgn0032123	FBtr0079827	-12482	Oatp30B	Organic anion transporting polypeptide 30B
98	chr2L	3606373	3606383	11	1-TGACCTTGAVH-1-chr2L	35.2	+	28.6223	Promoter (<=1kb)	3604224	3606756	2533	2	FBgn0002985	FBtr0077557	373	odd	odd skipped
99	chr3R	20573956	20573966	11	1-TGACCTTGAVH-1-chr3R	41.3	-	27.7246	Promoter (<=1kb)	20574906	20575043	138	1	FBgn0083039	FBtr0113583	-940	NA	NA
100	chrX	15298657	15298667	11	1-TGACCTTGAVH-1-chrX	43.7	-	27.1632	Promoter (<=1kb)	15299009	15319074	20066	1	FBgn0261703	FBtr0303198	-342	gce	germ cell-expressed bHLH-PAS
101	chr2R	14903789	14903799	11	1-TGACCTTGAVH-1-chr2R	47.4	-	26.5667	Promoter (<=1kb)	14901475	14903816	2342	2	FBgn0027596	FBtr0303758	17	Kank	kank
102	chr3R	7506616	7506626	11	1-TGACCTTGAVH-1-chr3R	46.9	+	26.3662	Promoter (1-2kb)	7494097	7505098	11002	2	FBgn0015577	FBtr0302354	-1518	alpha-Est9	alpha-Esterase-9
103	chr3R	26969264	26969274	11	1-TGACCTTGAVH-1-chr3R	35.7	+	26.1584	Promoter (2-3kb)	26966930	26977878	10949	1	FBgn0039466	FBtr0301134	2334	CG5521	uncharacterized protein
104	chr3R	9954734	9954744	11	1-TGACCTTGAVH-2-chr3R	41.2	-	26.057	3' UTR	9928917	9995364	66448	1	FBgn0267336	FBtr0305157	25817	Glut4EF	Glucose transporter 4 enhancer factor
105	chr3R	26544547	26544557	11	1-TGACCTTGAVH-1-chr3R	40.3	+	25.2837	Promoter (1-2kb)	26541292	26543209	1918	2	FBgn0267753	FBtr0347317	-1338	NA	NA
106	chrX	15118808	15118818	11	1-TGACCTTGAVH-1-chrX	41.6	+	25.2407	Promoter (2-3kb)	15113302	15116542	3241	2	FBgn0030615	FBtr0074028	-2266	Cyp4s3	Cyp4s3
107	chrX	7096835	7096845	11	1-TGACCTTGAVH-1-chrX	38.5	+	25.1599	Promoter (<=1kb)	7082921	7097066	14146	2	FBgn0264270	FBtr0331259	221	Sxl	Sex lethal
108	chr2R	18605913	18605923	11	1-TGACCTTGAVH-1-chr2R	42.2	-	24.9842	Intron (FBtr0300421/FBgn0050115, intron 1 of 7)	18554119	18611777	57659	2	FBgn0050115	FBtr0300421	5854	GEFmeso	Guanine nucleotide exchange factor in mesoderm
109	chr3R	28691791	28691801	11	1-TGACCTTGAVH-1-chr3R	43.2	-	24.8894	Promoter (2-3kb)	28689671	28695939	6269	1	FBgn0039594	FBtr0305087	2120	snu	snustorr
110	chrX	1619941	1619951	11	1-TGACCTTGAVH-2-chrX	36.5	+	24.8644	Promoter (1-2kb)	1552279	1618155	65877	2	FBgn0025390	FBtr0070284	-1786	Mur2B	Mucin related 2B
111	chr3R	14004171	14004181	11	1-TGACCTTGAVH-1-chr3R	42.3	+	24.7242	Intron (FBtr0301634/FBgn0264493, intron 2 of 8)	13967955	13983363	15409	2	FBgn0264493	FBtr0100361	-20808	rdx	roadkill
112	chr2R	14343914	14343924	11	1-TGACCTTGAVH-1-chr2R	40	+	24.7225	Promoter (1-2kb)	14342062	14351802	9741	1	FBgn0085408	FBtr0112616	1852	Shrm	Shroom
113	chr3L	17378678	17378688	11	1-TGACCTTGAVH-2-chr3L	33.7	+	24.4486	Promoter (<=1kb)	17367753	17379530	11778	2	FBgn0036715	FBtr0075239	842	Cad74A	Cadherin 74A
114	chr2L	18648758	18648768	11	1-TGACCTTGAVH-1-chr2L	34.7	-	24.3648	Intron (FBtr0081073/FBgn0032694, intron 2 of 3)	18651058	18653010	1953	2	FBgn0032693	FBtr0081077	4242	Cyp310a1	Cyp310a1
115	chr2R	12201313	12201323	11	1-TGACCTTGAVH-1-chr2R	43	+	24.163	Promoter (<=1kb)	12199391	12200815	1425	2	FBgn0033699	FBtr0088006	-498	RpS11	Ribosomal protein S11
116	chr2L	14409710	14409720	11	1-TGACCTTGAVH-1-chr2L	38.4	-	23.6429	Promoter (<=1kb)	14409755	14410045	291	1	FBgn0265946	FBtr0342910	-35	NA	NA
117	chr3R	19086661	19086671	11	1-TGACCTTGAVH-1-chr3R	33.9	-	23.5798	Intron (FBtr0305321/FBgn0004876, intron 2 of 8)	19044882	19094270	49389	2	FBgn0004876	FBtr0305321	7599	cdi	center divider
118	chr3R	23529009	23529019	11	1-TGACCTTGAVH-2-chr3R	35.5	-	23.3568	Promoter (<=1kb)	23522703	23528984	6282	2	FBgn0039084	FBtr0084423	-25	CG10175	uncharacterized protein
119	chr2R	22199247	22199257	11	1-TGACCTTGAVH-2-chr2R	36.9	-	23.0567	Promoter (1-2kb)	22197269	22197374	106	2	FBgn0086027	FBtr0114303	-1873	NA	NA
120	chr2L	5742570	5742580	11	1-TGACCTTGAVH-1-chr2L	49.3	-	23.0318	Promoter (1-2kb)	5733675	5741244	7570	2	FBgn0031734	FBtr0079165	-1326	CG11147	uncharacterized protein
121	chr3L	15539975	15539985	11	1-TGACCTTGAVH-2-chr3L	35.9	-	23.0177	Intron (FBtr0075557/FBgn0004396, intron 1 of 5)	15535395	15553214	17820	1	FBgn0004396	FBtr0075558	4580	CrebA	Cyclic-AMP response element binding protein A
122	chr3R	16985944	16985954	11	1-TGACCTTGAVH-1-chr3R	43	+	22.8852	Promoter (<=1kb)	16983510	16986245	2736	2	FBgn0038460	FBtr0337065	291	CG18622	uncharacterized protein
123	chrX	1271216	1271226	11	1-TGACCTTGAVH-1-chrX	42.5	-	22.8776	Intron (FBtr0070244/FBgn0028550, intron 1 of 4)	1242740	1275284	32545	2	FBgn0028550	FBtr0070244	4058	Atf3	Activating transcription factor 3
124	chr3L	16710032	16710042	11	1-TGACCTTGAVH-1-chr3L	51.8	-	22.4516	Promoter (1-2kb)	16676406	16711677	35272	2	FBgn0063485	FBtr0100145	1635	Lasp	lasp
125	chr2R	6812643	6812653	11	1-TGACCTTGAVH-1-chr2R	44.4	-	22.4377	Promoter (<=1kb)	6812532	6818199	5668	1	FBgn0265003	FBtr0335513	111	koi	klaroid
126	chrX	4703063	4703073	11	1-TGACCTTGAVH-1-chrX	40.5	-	22.4013	Promoter (<=1kb)	4702325	4705265	2941	1	FBgn0028325	FBtr0070711	738	Pdha	Pyruvate dehydrogenase E1 alpha subunit
127	chr2R	8152067	8152077	11	1-TGACCTTGAVH-2-chr2R	34.1	+	22.3272	Promoter (2-3kb)	8146918	8149435	2518	2	FBgn0010504	FBtr0088813	-2632	kermit	kermit
128	chr3R	14004187	14004197	11	1-TGACCTTGAVH-2-chr3R	34.6	-	22.3218	Intron (FBtr0301634/FBgn0264493, intron 2 of 8)	13967955	13983363	15409	2	FBgn0264493	FBtr0100361	-20824	rdx	roadkill
129	chr3L	20398713	20398723	11	1-TGACCTTGAVH-1-chr3L	33.3	+	22.2811	Promoter (2-3kb)	20395394	20395851	458	2	FBgn0267237	FBtr0346407	-2862	NA	NA
130	chr2R	16129111	16129121	11	1-TGACCTTGAVH-1-chr2R	47.9	-	21.9368	Intron (FBtr0089593/FBgn0086676, intron 1 of 7)	16124981	16138238	13258	1	FBgn0086676	FBtr0089592	4130	spin	spinster
131	chr2L	5742608	5742618	11	1-TGACCTTGAVH-2-chr2L	46.4	+	21.906	Promoter (1-2kb)	5733675	5741244	7570	2	FBgn0031734	FBtr0079165	-1364	CG11147	uncharacterized protein
132	chrX	3778303	3778313	11	1-TGACCTTGAVH-1-chrX	54	+	21.8256	Promoter (<=1kb)	3777382	3777505	124	1	FBgn0263532	FBtr0309620	921	NA	NA
133	chr2R	14139100	14139110	11	1-TGACCTTGAVH-1-chr2R	51.1	-	21.7533	Promoter (1-2kb)	14060456	14140902	80447	2	FBgn0040752	FBtr0339764	1792	Prosap	prosap
134	chr3L	7811784	7811794	11	1-TGACCTTGAVH-1-chr3L	45.8	-	21.6652	Promoter (1-2kb)	7777105	7809825	32721	2	FBgn0052369	FBtr0304992	-1959	CG32369	uncharacterized protein
135	chr2L	2130366	2130376	11	1-TGACCTTGAVH-1-chr2L	47.7	+	21.4474	Promoter (<=1kb)	2130813	2137043	6231	1	FBgn0004507	FBtr0100485	-437	GlyP	Glycogen phosphorylase
136	chr2L	10514972	10514982	11	1-TGACCTTGAVH-2-chr2L	43.9	-	21.3952	Promoter (1-2kb)	10511253	10516668	5416	2	FBgn0267828	FBtr0347403	1686	Fatp1	Fatty acid transport protein 1
137	chrX	1619935	1619945	11	1-TGACCTTGAVH-1-chrX	44.8	+	21.2515	Promoter (1-2kb)	1552279	1618155	65877	2	FBgn0025390	FBtr0070284	-1780	Mur2B	Mucin related 2B
138	chr2L	15910234	15910244	11	1-TGACCTTGAVH-2-chr2L	35	+	21.2279	Promoter (1-2kb)	15911691	15912062	372	1	FBgn0266161	FBtr0343723	-1447	NA	NA
139	chr2R	6133212	6133222	11	1-TGACCTTGAVH-1-chr2R	33.3	-	20.8591	Promoter (1-2kb)	6092277	6131922	39646	2	FBgn0000546	FBtr0086011	-1290	EcR	Ecdysone receptor
140	chrX	8863226	8863236	11	1-TGACCTTGAVH-1-chrX	35.9	-	20.7477	Promoter (<=1kb)	8864109	8872126	8018	1	FBgn0030065	FBtr0071253	-873	CG12075	uncharacterized protein
141	chr2R	7988156	7988166	11	1-TGACCTTGAVH-2-chr2R	46.3	-	20.7229	Promoter (<=1kb)	7988462	7991283	2822	1	FBgn0033247	FBtr0088860	-296	Nup44A	Nucleoporin at 44A
142	chrX	11514182	11514192	11	1-TGACCTTGAVH-2-chrX	33.3	-	20.6996	Intron (FBtr0301020/FBgn0052666, intron 2 of 5)	11493819	11555045	61227	1	FBgn0052666	FBtr0340295	20363	Drak	Death-associated protein kinase related
143	chr2R	7911701	7911711	11	1-TGACCTTGAVH-1-chr2R	47.9	-	20.6393	Intron (FBtr0088844/FBgn0050377, intron 4 of 4)	7915027	7916478	1452	2	FBgn0033232	FBtr0088889	4767	CG12159	uncharacterized protein
144	chr2L	20382388	20382398	11	1-TGACCTTGAVH-1-chr2L	45.4	-	20.5749	Promoter (<=1kb)	20376981	20382356	5376	2	FBgn0032856	FBtr0081371	-32	CG16798	uncharacterized protein
145	chrX	3674177	3674187	11	1-TGACCTTGAVH-1-chrX	55	+	20.3276	Promoter (2-3kb)	3671801	3700780	28980	1	FBgn0023215	FBtr0301821	2376	Mnt	Mnt
146	chrX	9344507	9344517	11	1-TGACCTTGAVH-1-chrX	44.4	-	20.226	Intron (FBtr0112753/FBgn0085478, intron 2 of 10)	9324508	9356227	31720	2	FBgn0085478	FBtr0112753	11710	CG34449	uncharacterized protein
147	chr3L	7530717	7530727	11	1-TGACCTTGAVH-1-chr3L	37.9	+	20.177	Promoter (1-2kb)	7532429	7538279	5851	1	FBgn0028582	FBtr0076795	-1702	lqf	liquid facets
148	chr3R	20839749	20839759	11	1-TGACCTTGAVH-1-chr3R	37.2	-	20.0634	Promoter (2-3kb)	20842140	20844981	2842	1	FBgn0038832	FBtr0083967	-2381	CG15695	uncharacterized protein
149	chrX	15132376	15132386	11	1-TGACCTTGAVH-1-chrX	46	-	19.7595	Intron (FBtr0100009/FBgn0260006, intron 2 of 8)	15125753	15137311	11559	1	FBgn0260006	FBtr0100009	6623	drd	drop dead
150	chr2R	12201328	12201338	11	1-TGACCTTGAVH-2-chr2R	34.6	+	19.6587	Promoter (<=1kb)	12199391	12200815	1425	2	FBgn0033699	FBtr0088006	-513	RpS11	Ribosomal protein S11
151	chrX	11326718	11326728	11	1-TGACCTTGAVH-1-chrX	44.7	+	19.488	Promoter (1-2kb)	11325385	11334071	8687	1	FBgn0030286	FBtr0073448	1333	Gapvd1	GTPase activating protein and VPS9 domains 1
152	chr3L	1463518	1463528	11	1-TGACCTTGAVH-1-chr3L	40.1	+	19.4193	Promoter (<=1kb)	1463811	1468475	4665	1	FBgn0004635	FBtr0072694	-283	rho	rhomboid
153	chr2L	20382382	20382392	11	1-TGACCTTGAVH-2-chr2L	39.9	-	19.3116	Promoter (<=1kb)	20376981	20382356	5376	2	FBgn0032856	FBtr0081371	-26	CG16798	uncharacterized protein
154	chr2R	13839869	13839879	11	1-TGACCTTGAVH-1-chr2R	43.4	-	19.2885	Promoter (<=1kb)	13840053	13841743	1691	1	FBgn0033875	FBtr0087638	-174	CG6357	uncharacterized protein
155	chr2R	10076571	10076581	11	1-TGACCTTGAVH-1-chr2R	39.9	+	19.2094	Promoter (<=1kb)	10070981	10075645	4665	2	FBgn0033482	FBtr0088428	-926	CG1371	uncharacterized protein
156	chr2L	14666982	14666992	11	1-TGACCTTGAVH-2-chr2L	35.5	+	19.1245	Intron (FBtr0301496/FBgn0003016, intron 1 of 11)	14599196	14689340	90145	2	FBgn0003016	FBtr0301496	22348	osp	outspread
157	chr3R	23528989	23528999	11	1-TGACCTTGAVH-1-chr3R	37.3	-	18.9168	Promoter (<=1kb)	23522703	23528984	6282	2	FBgn0039084	FBtr0084423	-5	CG10175	uncharacterized protein
158	chr2R	23793288	23793298	11	1-TGACCTTGAVH-1-chr2R	34.6	+	18.7575	Promoter (2-3kb)	23790614	23791227	614	2	FBgn0034904	FBtr0072245	-2061	CG15800	uncharacterized protein
159	chr3L	17604986	17604996	11	1-TGACCTTGAVH-1-chr3L	36.5	-	18.7522	Intron (FBtr0075202/FBgn0000567, intron 1 of 7)	17560158	17619325	59168	2	FBgn0000567	FBtr0075202	14329	Eip74EF	Ecdysone-induced protein 74EF
160	chr2R	16785933	16785943	11	1-TGACCTTGAVH-1-chr2R	39.8	+	18.7393	Promoter (1-2kb)	16787175	16792472	5298	1	FBgn0034158	FBtr0087030	-1232	CG5522	uncharacterized protein
161	chr2R	14574436	14574446	11	1-TGACCTTGAVH-1-chr2R	36.4	+	18.7329	Promoter (1-2kb)	14570810	14575771	4962	2	FBgn0010397	FBtr0087512	1325	LamC	Lamin C
162	chr2R	10868969	10868979	11	1-TGACCTTGAVH-1-chr2R	35.5	-	18.7064	Intron (FBtr0088242/FBgn0050015, intron 1 of 7)	10839102	10874771	35670	2	FBgn0050015	FBtr0088242	5792	CG30015	uncharacterized protein
163	chr3R	5322456	5322466	11	1-TGACCTTGAVH-1-chr3R	37.6	+	18.4892	Promoter (1-2kb)	5270116	5323847	53732	2	FBgn0013576	FBtr0078810	1381	mtd	mustard
164	chr3L	3344571	3344581	11	1-TGACCTTGAVH-1-chr3L	45.8	+	18.3546	Intron (FBtr0303857/FBgn0004167, intron 2 of 14)	3350108	3368133	18026	1	FBgn0004167	FBtr0300017	-5527	kst	karst
165	chr3R	23792544	23792554	11	1-TGACCTTGAVH-3-chr3R	33.7	-	18.3152	Exon (FBtr0084459/FBgn0015513, exon 4 of 14)	23781765	23801634	19870	1	FBgn0015513	FBtr0304729	10779	mbc	myoblast city
166	chr2R	7665735	7665745	11	1-TGACCTTGAVH-1-chr2R	39.4	+	17.8532	Promoter (<=1kb)	7665828	7667343	1516	1	FBgn0033205	FBtr0088923	-83	CG2064	uncharacterized protein
167	chrX	9030362	9030372	11	1-TGACCTTGAVH-1-chrX	40.6	+	17.8343	Promoter (<=1kb)	9030205	9054575	24371	1	FBgn0259734	FBtr0343357	157	Nost	Nostrin
168	chr2R	14483936	14483946	11	1-TGACCTTGAVH-1-chr2R	48.1	-	17.8052	Promoter (2-3kb)	14481187	14497312	16126	1	FBgn0267824	FBtr0347396	2749	PRAS40	Proline-rich Akt substrate 40 kDa
169	chr3L	17605773	17605783	11	1-TGACCTTGAVH-1-chr3L	46.4	+	17.7843	Intron (FBtr0075202/FBgn0000567, intron 1 of 7)	17560158	17619325	59168	2	FBgn0000567	FBtr0075202	13542	Eip74EF	Ecdysone-induced protein 74EF
170	chr3L	17614036	17614046	11	1-TGACCTTGAVH-1-chr3L	42.2	+	17.6664	Intron (FBtr0075202/FBgn0000567, intron 1 of 7)	17560158	17619325	59168	2	FBgn0000567	FBtr0075202	5279	Eip74EF	Ecdysone-induced protein 74EF
171	chrX	20506726	20506736	11	1-TGACCTTGAVH-1-chrX	50.4	+	17.6384	Intron (FBtr0301537/FBgn0031118, intron 2 of 14)	20469955	20510694	40740	2	FBgn0031118	FBtr0301537	3958	RhoGAP19D	Rho GTPase activating protein at 19D
172	chr2R	21491809	21491819	11	1-TGACCTTGAVH-1-chr2R	38.1	-	17.5799	Intron (FBtr0342897/FBgn0010470, intron 1 of 3)	21487167	21495524	8358	2	FBgn0010470	FBtr0342897	3705	Fkbp14	FK506-binding protein 14
173	chr3L	17614024	17614034	11	1-TGACCTTGAVH-2-chr3L	36.7	-	17.5539	Intron (FBtr0075202/FBgn0000567, intron 1 of 7)	17560158	17619325	59168	2	FBgn0000567	FBtr0075202	5291	Eip74EF	Ecdysone-induced protein 74EF
174	chr3R	5264034	5264044	11	1-TGACCTTGAVH-1-chr3R	36.5	+	17.5271	Promoter (<=1kb)	5263757	5264511	755	2	FBgn0267443	FBtr0346781	467	NA	NA
175	chrX	16832110	16832120	11	1-TGACCTTGAVH-1-chrX	39.6	+	17.4383	Intron (FBtr0112996/FBgn0030797, intron 1 of 2)	16826681	16835520	8840	2	FBgn0030797	FBtr0112996	3400	CG13004	uncharacterized protein
176	chr2L	9686309	9686319	11	1-TGACCTTGAVH-1-chr2L	42.1	+	17.4286	Intron (FBtr0079851/FBgn0000273, intron 2 of 2)	9682315	9699297	16983	2	FBgn0000273	FBtr0079851	12978	Pka-C1	Protein kinase, cAMP-dependent, catalytic subunit 1
177	chr3L	17590730	17590740	11	1-TGACCTTGAVH-1-chr3L	41	-	17.3435	Intron (FBtr0075202/FBgn0000567, intron 5 of 7)	17560158	17576626	16469	2	FBgn0000567	FBtr0075204	-14104	Eip74EF	Ecdysone-induced protein 74EF
178	chr3L	1585227	1585237	11	1-TGACCTTGAVH-1-chr3L	36.8	-	17.1489	Promoter (1-2kb)	1586694	1600845	14152	1	FBgn0035237	FBtr0347066	-1457	CG13917	uncharacterized protein
179	chr2R	8149867	8149877	11	1-TGACCTTGAVH-1-chr2R	39.3	-	17.1301	Promoter (<=1kb)	8146918	8149435	2518	2	FBgn0010504	FBtr0088813	-432	kermit	kermit
180	chr3R	7949520	7949530	11	1-TGACCTTGAVH-1-chr3R	44.7	-	17.0151	Intron (FBtr0330073/FBgn0000504, intron 2 of 4)	7924323	7962786	38464	2	FBgn0000504	FBtr0330073	13256	dsx	doublesex
181	chr3R	20574084	20574094	11	1-TGACCTTGAVH-2-chr3R	41.3	-	16.5062	Promoter (<=1kb)	20574906	20575043	138	1	FBgn0083039	FBtr0113583	-812	NA	NA
182	chr3L	18105918	18105928	11	1-TGACCTTGAVH-1-chr3L	41.6	+	16.1751	Promoter (<=1kb)	18088417	18106149	17733	2	FBgn0036773	FBtr0075137	221	CG13698	uncharacterized protein
183	chr3R	10095002	10095012	11	1-TGACCTTGAVH-1-chr3R	43.1	+	16.0044	Promoter (1-2kb)	10093761	10101356	7596	1	FBgn0263413	FBtr0346908	1241	NA	NA
184	chr3L	2276421	2276431	11	1-TGACCTTGAVH-1-chr3L	55.6	-	15.5652	Promoter (<=1kb)	2276550	2278038	1489	1	FBgn0035328	FBtr0072883	-119	yellow-g2	yellow-g2
185	chr2R	22199241	22199251	11	1-TGACCTTGAVH-3-chr2R	33.6	-	15.4272	Promoter (1-2kb)	22197269	22197374	106	2	FBgn0086027	FBtr0114303	-1867	NA	NA
186	chr2R	8152145	8152155	11	1-TGACCTTGAVH-1-chr2R	39.8	-	15.3297	Promoter (2-3kb)	8146918	8149435	2518	2	FBgn0010504	FBtr0088813	-2710	kermit	kermit
187	chr2L	6087054	6087064	11	1-TGACCTTGAVH-1-chr2L	45.8	-	14.8774	Intron (FBtr0344437/FBgn0266450, intron 1 of 3)	6091412	6096498	5087	1	FBgn0266445	FBtr0344439	-4348	CG45075	uncharacterized protein
188	chrX	1619352	1619362	11	1-TGACCTTGAVH-1-chrX	52.7	-	14.8324	Promoter (1-2kb)	1552279	1618155	65877	2	FBgn0025390	FBtr0070284	-1197	Mur2B	Mucin related 2B
189	chr2R	12598998	12599008	11	1-TGACCTTGAVH-1-chr2R	46.3	-	14.702	Intron (FBtr0087828/FBgn0027356, intron 1 of 9)	12594392	12595649	1258	2	FBgn0264510	FBtr0333104	-3349	NA	NA
190	chr3L	17913297	17913307	11	1-TGACCTTGAVH-1-chr3L	56.8	-	14.6484	Promoter (<=1kb)	17909483	17912565	3083	2	FBgn0036772	FBtr0075152	-732	CG5290	uncharacterized protein
191	chrX	9585757	9585767	11	1-TGACCTTGAVH-1-chrX	44.4	+	14.3468	Promoter (<=1kb)	9585675	9589813	4139	1	FBgn0001186	FBtr0333335	82	Hex-A	Hexokinase A
192	chr2L	21218839	21218849	11	1-TGACCTTGAVH-1-chr2L	43.9	-	14.2205	Promoter (<=1kb)	21216004	21218544	2541	2	FBgn0032934	FBtr0081488	-295	CG8679	uncharacterized protein
193	chrX	8234270	8234280	11	1-TGACCTTGAVH-1-chrX	39.9	-	14.1923	Intron (FBtr0100376/FBgn0261873, intron 11 of 16)	8230614	8239427	8814	1	FBgn0261873	FBtr0308219	3656	sdt	stardust
194	chr3L	17958912	17958922	11	1-TGACCTTGAVH-2-chr3L	36.8	+	14.098	Promoter (2-3kb)	17953358	17961814	8457	2	FBgn0000568	FBtr0075151	2892	Eip75B	Ecdysone-induced protein 75B
195	chr3L	2568271	2568281	11	1-TGACCTTGAVH-1-chr3L	34.2	+	13.979	Intron (FBtr0072956/FBgn0010909, intron 3 of 18)	2508047	2554292	46246	2	FBgn0010905	FBtr0345047	-13979	Spn	Spinophilin
196	chrX	6268338	6268348	11	1-TGACCTTGAVH-1-chrX	41.3	-	13.9229	Promoter (<=1kb)	6267797	6274984	7188	1	FBgn0028982	FBtr0070896	541	Spt6	Spt6
197	chr3L	11055789	11055799	11	1-TGACCTTGAVH-1-chr3L	35.9	+	13.7712	Promoter (<=1kb)	11055541	11059659	4119	1	FBgn0036116	FBtr0076200	248	CG7888	uncharacterized protein
198	chrX	3174500	3174510	11	1-TGACCTTGAVH-1-chrX	34.6	-	13.7419	Promoter (<=1kb)	3173376	3174474	1099	2	FBgn0000644	FBtr0070542	-26	Fcp3C	Follicle cell protein 3C
199	chr3R	18456738	18456748	11	1-TGACCTTGAVH-1-chr3R	39.5	+	13.6964	Intron (FBtr0083644/FBgn0004652, intron 2 of 7)	18431233	18450254	19022	2	FBgn0004652	FBtr0083647	-6484	fru	fruitless
200	chrX	6220144	6220154	11	1-TGACCTTGAVH-1-chrX	49.1	-	13.6952	Promoter (<=1kb)	6220255	6222719	2465	1	FBgn0029849	FBtr0070875	-101	Efr	ER GDP-fucose transporter
201	chr3L	17958742	17958752	11	1-TGACCTTGAVH-1-chr3L	47	+	13.658	Intron (FBtr0306814/FBgn0000568, intron 6 of 7)	17953358	17961814	8457	2	FBgn0000568	FBtr0075151	3062	Eip75B	Ecdysone-induced protein 75B
202	chr2R	14318093	14318103	11	1-TGACCTTGAVH-1-chr2R	38.3	-	13.5762	Intron (FBtr0112614/FBgn0085408, intron 2 of 9)	14308142	14351802	43661	1	FBgn0085408	FBtr0339991	9951	Shrm	Shroom
203	chr3L	11491532	11491542	11	1-TGACCTTGAVH-1-chr3L	48.6	-	13.386	Promoter (2-3kb)	11493871	11499055	5185	1	FBgn0036165	FBtr0344910	-2329	chrb	charybde
204	chrX	15132453	15132463	11	1-TGACCTTGAVH-2-chrX	33.2	-	13.1132	Intron (FBtr0100009/FBgn0260006, intron 2 of 8)	15125753	15137311	11559	1	FBgn0260006	FBtr0100009	6700	drd	drop dead
205	chr3L	17604980	17604990	11	1-TGACCTTGAVH-2-chr3L	33.1	-	13.0462	Intron (FBtr0075202/FBgn0000567, intron 1 of 7)	17560158	17619325	59168	2	FBgn0000567	FBtr0075202	14335	Eip74EF	Ecdysone-induced protein 74EF
206	chr3L	17841271	17841281	11	1-TGACCTTGAVH-1-chr3L	38.5	+	12.7955	Promoter (<=1kb)	17838650	17841427	2778	2	FBgn0036759	FBtr0347063	146	CG5577	uncharacterized protein
207	chr3R	9954703	9954713	11	1-TGACCTTGAVH-1-chr3R	49.5	+	12.7531	3' UTR	9928917	9995364	66448	1	FBgn0267336	FBtr0305157	25786	Glut4EF	Glucose transporter 4 enhancer factor
208	chr3R	7949514	7949524	11	1-TGACCTTGAVH-2-chr3R	37.5	-	12.6906	Intron (FBtr0330073/FBgn0000504, intron 2 of 4)	7924323	7962786	38464	2	FBgn0000504	FBtr0330073	13262	dsx	doublesex
209	chr2R	10776885	10776895	11	1-TGACCTTGAVH-1-chr2R	41.6	+	12.6451	Intron (FBtr0302517/FBgn0053144, intron 2 of 8)	10740396	10782869	42474	2	FBgn0053144	FBtr0088254	5974	CG33144	uncharacterized protein
210	chr2R	22199213	22199223	11	1-TGACCTTGAVH-1-chr2R	37	-	12.2534	Promoter (1-2kb)	22197269	22197374	106	2	FBgn0086027	FBtr0114303	-1839	NA	NA
211	chrX	3369294	3369304	11	1-TGACCTTGAVH-1-chrX	33.1	+	12.155	Distal Intergenic	3373159	3386011	12853	1	FBgn0262656	FBtr0070525	-3855	Myc	Myc
212	chr2R	22121889	22121899	11	1-TGACCTTGAVH-1-chr2R	38.6	+	12.1219	Promoter (<=1kb)	22122101	22124367	2267	1	FBgn0002715	FBtr0071761	-202	mei-S332	meiotic from via Salaria 332
213	chr2L	20083049	20083059	11	1-TGACCTTGAVH-1-chr2L	47.4	-	12.0007	Promoter (2-3kb)	20079270	20085070	5801	2	FBgn0263773	FBtr0310560	2011	fok	fledgling of Klp38B
214	chr3L	13953255	13953265	11	1-TGACCTTGAVH-1-chr3L	42.6	-	11.9768	Intron (FBtr0075757/FBgn0052137, intron 2 of 6)	13962658	13964702	2045	2	FBgn0025874	FBtr0075791	11437	Meics	Meiotic central spindle
215	chr3R	12443011	12443021	11	1-TGACCTTGAVH-2-chr3R	33.3	-	11.6643	Promoter (<=1kb)	12443582	12447616	4035	1	FBgn0086687	FBtr0082629	-561	Desat1	Desaturase 1
216	chr2R	13014761	13014771	11	1-TGACCTTGAVH-1-chr2R	36.8	-	11.5368	Distal Intergenic	12997123	13007802	10680	1	FBgn0265623	FBtr0087793	17638	Su(z)2	Suppressor of zeste 2
217	chr2L	14246480	14246490	11	1-TGACCTTGAVH-1-chr2L	39.2	-	11.5285	Distal Intergenic	14241144	14241732	589	1	FBgn0265147	FBtr0336992	5336	NA	NA
218	chrX	19154311	19154321	11	1-TGACCTTGAVH-1-chrX	37.9	-	11.3919	Promoter (<=1kb)	19142113	19153458	11346	2	FBgn0261461	FBtr0299624	-853	RhoGAP18B	Rho GTPase activating protein at 18B
219	chr3R	17713311	17713321	11	1-TGACCTTGAVH-1-chr3R	43.3	+	11.384	Intron (FBtr0089581/FBgn0261885, intron 2 of 15)	17687818	17718350	30533	2	FBgn0261885	FBtr0089581	5029	osa	osa
220	chr3R	11803298	11803308	11	1-TGACCTTGAVH-1-chr3R	38.5	-	11.3706	Promoter (1-2kb)	11797244	11804609	7366	2	FBgn0051116	FBtr0082526	1301	ClC-a	Chloride channel-a
221	chr2R	22071000	22071010	11	1-TGACCTTGAVH-1-chr2R	33.2	-	11.2875	Promoter (<=1kb)	22069725	22071286	1562	2	FBgn0034687	FBtr0071803	276	CG11475	uncharacterized protein
222	chr2L	3095746	3095756	11	1-TGACCTTGAVH-1-chr2L	47	-	11.1207	Promoter (1-2kb)	3069396	3094695	25300	2	FBgn0015600	FBtr0077664	-1051	toc	toucan
223	chrX	11524182	11524192	11	1-TGACCTTGAVH-1-chrX	36.5	+	10.9098	Intron (FBtr0301020/FBgn0052666, intron 2 of 5)	11547422	11547497	76	1	FBgn0262335	FBtr0304518	-23230	NA	NA
224	chr3R	20274593	20274603	11	1-TGACCTTGAVH-1-chr3R	38.1	+	10.7753	Intron (FBtr0305029/FBgn0262582, intron 2 of 18)	20293044	20301377	8334	1	FBgn0262582	FBtr0334306	-18441	cic	capicua
225	chr2R	19156478	19156488	11	1-TGACCTTGAVH-1-chr2R	35.1	+	10.5718	Promoter (1-2kb)	19155221	19162598	7378	1	FBgn0000578	FBtr0114623	1257	ena	enabled
226	chr3R	7810656	7810666	11	1-TGACCTTGAVH-1-chr3R	58.1	+	10.4698	Promoter (<=1kb)	7810532	7811912	1381	1	FBgn0051472	FBtr0081748	124	sgll	sugarlethal
227	chr2R	13584279	13584289	11	1-TGACCTTGAVH-2-chr2R	35.8	-	10.4263	Intron (FBtr0330617/FBgn0027581, intron 2 of 8)	13578036	13579626	1591	1	FBgn0265497	FBtr0339944	6243	NA	NA
228	chr3L	99668	99678	11	1-TGACCTTGAVH-1-chr3L	40.2	-	10.2436	Promoter (1-2kb)	97628	98375	748	2	FBgn0040688	FBtr0072540	-1293	CG12483	uncharacterized protein
229	chr3L	8729611	8729621	11	1-TGACCTTGAVH-1-chr3L	39.4	-	10.2263	Promoter (<=1kb)	8729865	8730604	740	1	FBgn0000358	FBtr0076573	-244	Cp19	Chorion protein 19
230	chr3R	14729990	14730000	11	1-TGACCTTGAVH-1-chr3R	54.5	+	10.2241	Promoter (<=1kb)	14724760	14729078	4319	2	FBgn0038256	FBtr0333277	-912	CG7530	uncharacterized protein
231	chr3L	16338011	16338021	11	1-TGACCTTGAVH-1-chr3L	44	-	10.0572	Promoter (<=1kb)	16339003	16345241	6239	1	FBgn0036612	FBtr0075377	-982	CG4998	uncharacterized protein
232	chr3L	12668363	12668373	11	1-TGACCTTGAVH-1-chr3L	39.2	-	9.52811	Distal Intergenic	12661826	12662247	422	1	FBgn0265745	FBtr0340702	6537	NA	NA
233	chr3L	13953285	13953295	11	1-TGACCTTGAVH-2-chr3L	37.2	-	9.47646	Intron (FBtr0075757/FBgn0052137, intron 2 of 6)	13962658	13964702	2045	2	FBgn0025874	FBtr0075791	11407	Meics	Meiotic central spindle
234	chr3L	20123239	20123249	11	1-TGACCTTGAVH-1-chr3L	39.9	-	9.44652	Downstream (1-2kb)	20124298	20126502	2205	2	FBgn0036939	FBtr0332700	3253	CG7365	uncharacterized protein
235	chr3L	10787055	10787065	11	1-TGACCTTGAVH-1-chr3L	33.4	-	9.19296	Promoter (2-3kb)	10789334	10789876	543	1	FBgn0265738	FBtr0340695	-2269	NA	NA
236	chr3L	21200377	21200387	11	1-TGACCTTGAVH-1-chr3L	40	-	9.11963	Promoter (<=1kb)	21198261	21200688	2428	2	FBgn0053056	FBtr0078313	301	CG33056	uncharacterized protein
237	chr3R	5303068	5303078	11	1-TGACCTTGAVH-1-chr3R	33.5	+	9.04608	Promoter (2-3kb)	5300145	5301186	1042	1	FBgn0037310	FBtr0078784	2923	Tim17b1	Tim17b1
238	chr3R	17679791	17679801	11	1-TGACCTTGAVH-1-chr3R	44.9	-	8.68497	Promoter (<=1kb)	17673732	17679876	6145	2	FBgn0038535	FBtr0335026	75	alt	aluminum tubes
239	chr2R	6145947	6145957	11	1-TGACCTTGAVH-1-chr2R	51.5	-	8.67056	Intron (FBtr0086010/FBgn0000546, intron 4 of 7)	6142372	6142444	73	2	FBgn0011891	FBtr0086017	-3503	NA	NA
240	chr3L	17956790	17956800	11	1-TGACCTTGAVH-1-chr3L	49.8	-	8.63264	Intron (FBtr0306814/FBgn0000568, intron 6 of 7)	17953358	17961814	8457	2	FBgn0000568	FBtr0075151	5014	Eip75B	Ecdysone-induced protein 75B
241	chr2L	1928146	1928156	11	1-TGACCTTGAVH-1-chr2L	55	+	8.59266	Promoter (<=1kb)	1927753	1943947	16195	1	FBgn0031374	FBtr0110883	393	Wdr62	WD repeat domain 62
242	chrX	692936	692946	11	1-TGACCTTGAVH-1-chrX	44	-	8.55068	Intron (FBtr0070130/FBgn0021764, intron 2 of 14)	686834	749496	62663	1	FBgn0021764	FBtr0340197	6102	sdk	sidekick
243	chr3R	5304941	5304951	11	1-TGACCTTGAVH-1-chr3R	35.9	-	8.53391	Intron (FBtr0078810/FBgn0013576, intron 4 of 18)	5272947	5308089	35143	2	FBgn0013576	FBtr0110932	3138	mtd	mustard
244	chr3L	17580893	17580903	11	1-TGACCTTGAVH-1-chr3L	44.4	+	8.15313	Intron (FBtr0075202/FBgn0000567, intron 5 of 7)	17560158	17576626	16469	2	FBgn0000567	FBtr0075204	-4267	Eip74EF	Ecdysone-induced protein 74EF
245	chrX	2089890	2089900	11	1-TGACCTTGAVH-1-chrX	37.7	+	8.1399	Promoter (<=1kb)	2089336	2093093	3758	1	FBgn0040395	FBtr0333755	554	Unc-76	Unc-76
246	chr3R	23792605	23792615	11	1-TGACCTTGAVH-1-chr3R	37.5	-	8.13768	Intron (FBtr0084459/FBgn0015513, intron 4 of 13)	23781765	23801634	19870	1	FBgn0015513	FBtr0304729	10840	mbc	myoblast city
247	chrX	9501964	9501974	11	1-TGACCTTGAVH-1-chrX	38.2	-	8.09587	Promoter (1-2kb)	9359850	9500129	140280	2	FBgn0261260	FBtr0302153	-1835	mgl	Megalin
248	chr2L	19472208	19472218	11	1-TGACCTTGAVH-1-chr2L	36.2	+	7.83455	Promoter (<=1kb)	19470844	19471627	784	2	FBgn0264391	FBtr0332319	-581	NA	NA
249	chrX	11485563	11485573	11	1-TGACCTTGAVH-1-chrX	52.7	-	7.69933	Promoter (<=1kb)	11485250	11486566	1317	1	FBgn0030306	FBtr0340294	313	Spase25	Spase 25-subunit
250	chr2R	14123218	14123228	11	1-TGACCTTGAVH-1-chr2R	38.3	+	7.69666	Intron (FBtr0339764/FBgn0040752, intron 1 of 10)	14060456	14140902	80447	2	FBgn0040752	FBtr0339764	17674	Prosap	prosap
251	chr3R	14806756	14806766	11	1-TGACCTTGAVH-2-chr3R	34.1	+	7.5713	3' UTR	14806543	14811610	5068	2	FBgn0266756	FBtr0334288	4844	btsz	bitesize
252	chr2R	7988162	7988172	11	1-TGACCTTGAVH-1-chr2R	55	-	7.22096	Promoter (<=1kb)	7988462	7991283	2822	1	FBgn0033247	FBtr0088860	-290	Nup44A	Nucleoporin at 44A
253	chrX	19148238	19148248	11	1-TGACCTTGAVH-1-chrX	40.6	+	7.20672	Intron (FBtr0299623/FBgn0261461, intron 3 of 7)	19142113	19153458	11346	2	FBgn0261461	FBtr0299624	5210	RhoGAP18B	Rho GTPase activating protein at 18B
254	chr2R	16881453	16881463	11	1-TGACCTTGAVH-1-chr2R	46.3	-	7.151	Promoter (<=1kb)	16880713	16884695	3983	1	FBgn0034166	FBtr0340070	740	CG6472	uncharacterized protein
255	chr3R	20293202	20293212	11	1-TGACCTTGAVH-1-chr3R	40.6	+	6.86571	Promoter (<=1kb)	20293244	20301377	8134	1	FBgn0262582	FBtr0305026	-32	cic	capicua
256	chr3L	18014497	18014507	11	1-TGACCTTGAVH-1-chr3L	37.7	+	6.65434	Intron (FBtr0306814/FBgn0000568, intron 3 of 7)	18002978	18003078	101	2	FBgn0086081	FBtr0114357	-11419	NA	NA
257	chr3R	21658018	21658028	11	1-TGACCTTGAVH-1-chr3R	45.8	-	6.60282	Promoter (2-3kb)	21621368	21660432	39065	2	FBgn0011766	FBtr0084117	2404	E2f1	E2F transcription factor 1
258	chr3L	15242932	15242942	11	1-TGACCTTGAVH-1-chr3L	39.8	+	6.44886	Distal Intergenic	15235619	15242832	7214	1	FBgn0029114	FBtr0075607	7313	Tollo	tollo
259	chr3L	20509282	20509292	11	1-TGACCTTGAVH-1-chr3L	33.1	-	6.3885	Promoter (<=1kb)	20509687	20514107	4421	1	FBgn0052425	FBtr0078205	-395	CG32425	uncharacterized protein
260	chr2R	16611554	16611564	11	1-TGACCTTGAVH-1-chr2R	48.4	-	6.21391	Promoter (<=1kb)	16611876	16624894	13019	1	FBgn0034145	FBtr0302206	-312	CG5065	uncharacterized protein
261	chr3R	28683675	28683685	11	1-TGACCTTGAVH-1-chr3R	38.1	-	6.01696	Promoter (1-2kb)	28682341	28695939	13599	1	FBgn0039594	FBtr0305088	1334	snu	snustorr
262	chr3L	17615434	17615444	11	1-TGACCTTGAVH-1-chr3L	36.6	+	5.92465	Intron (FBtr0075202/FBgn0000567, intron 1 of 7)	17560158	17619325	59168	2	FBgn0000567	FBtr0075202	3881	Eip74EF	Ecdysone-induced protein 74EF
263	chr3R	24090369	24090379	11	1-TGACCTTGAVH-1-chr3R	45.2	+	5.72397	Intron (FBtr0084587/FBgn0053100, intron 2 of 3)	24101600	24105763	4164	2	FBgn0013343	FBtr0303161	15384	Syx1A	Syntaxin 1A
264	chr3L	17967760	17967770	11	1-TGACCTTGAVH-1-chr3L	35.2	-	5.61972	Intron (FBtr0306814/FBgn0000568, intron 5 of 7)	17952162	17971439	19278	2	FBgn0000568	FBtr0075150	3669	Eip75B	Ecdysone-induced protein 75B
265	chr3R	12442981	12442991	11	1-TGACCTTGAVH-1-chr3R	37.7	-	5.40162	Promoter (<=1kb)	12443582	12447616	4035	1	FBgn0086687	FBtr0082629	-591	Desat1	Desaturase 1
266	chrX	14762789	14762799	11	1-TGACCTTGAVH-1-chrX	36.3	+	5.19239	Promoter (2-3kb)	14757531	14765787	8257	2	FBgn0030576	FBtr0073939	2988	CG15890	uncharacterized protein
267	chr3R	14730028	14730038	11	1-TGACCTTGAVH-2-chr3R	39.2	+	5.1509	Promoter (<=1kb)	14724760	14729078	4319	2	FBgn0038256	FBtr0333277	-950	CG7530	uncharacterized protein
268	chrX	18370807	18370817	11	1-TGACCTTGAVH-2-chrX	35.9	-	5.075	Promoter (<=1kb)	18370897	18374096	3200	1	FBgn0265784	FBtr0308232	-80	CrebB	Cyclic-AMP response element binding protein B
269	chr3R	24576185	24576195	11	1-TGACCTTGAVH-1-chr3R	37.9	-	5.06045	Promoter (1-2kb)	24559280	24577453	18174	2	FBgn0039209	FBtr0084674	1258	REPTOR	Repressed by TOR
270	chrX	19154269	19154279	11	1-TGACCTTGAVH-2-chrX	36.7	+	4.92987	Promoter (<=1kb)	19142113	19153458	11346	2	FBgn0261461	FBtr0299624	-811	RhoGAP18B	Rho GTPase activating protein at 18B
271	chr3L	18795902	18795912	11	1-TGACCTTGAVH-1-chr3L	50.8	+	4.60666	Intron (FBtr0075086/FBgn0001078, intron 2 of 9)	18751749	18801309	49561	2	FBgn0001078	FBtr0075086	5397	ftz-f1	ftz transcription factor 1
272	chr3L	17581180	17581190	11	1-TGACCTTGAVH-1-chr3L	39	+	4.57394	Intron (FBtr0075202/FBgn0000567, intron 5 of 7)	17560158	17576626	16469	2	FBgn0000567	FBtr0075204	-4554	Eip74EF	Ecdysone-induced protein 74EF
273	chr3R	26551812	26551822	11	1-TGACCTTGAVH-1-chr3R	46.3	+	4.49268	Intron (FBtr0308624/FBgn0263289, intron 3 of 13)	26541292	26543209	1918	2	FBgn0267753	FBtr0347317	-8603	NA	NA
274	chr3R	20663276	20663286	11	1-TGACCTTGAVH-1-chr3R	42.4	+	4.48031	Distal Intergenic	20652567	20659904	7338	2	FBgn0038818	FBtr0334642	-3372	Nep4	Neprilysin 4
275	chr3L	6232532	6232542	11	1-TGACCTTGAVH-1-chr3L	34.3	+	4.3316	Promoter (<=1kb)	6231805	6232361	557	2	FBgn0035694	FBtr0077013	-171	CG13299	uncharacterized protein
276	chr3L	18057166	18057176	11	1-TGACCTTGAVH-1-chr3L	44.7	-	4.10847	Promoter (2-3kb)	17953358	18059598	106241	2	FBgn0000568	FBtr0075148	2422	Eip75B	Ecdysone-induced protein 75B
277	chr2L	19143771	19143781	11	1-TGACCTTGAVH-1-chr2L	35.5	+	3.71262	Intron (FBtr0081158/FBgn0010300, intron 1 of 3)	19133023	19135233	2211	2	FBgn0086447	FBtr0336628	-8538	l(2)37Cg	lethal (2) 37Cg
278	chr3L	21055353	21055363	11	1-TGACCTTGAVH-1-chr3L	35.2	-	3.6831	Intron (FBtr0078289/FBgn0026179, intron 1 of 5)	21058832	21075444	16613	1	FBgn0026179	FBtr0078290	-3469	siz	schizo
279	chr3L	8979044	8979054	11	1-TGACCTTGAVH-1-chr3L	34.5	-	3.49744	Promoter (<=1kb)	8977395	8979880	2486	2	FBgn0035948	FBtr0076556	826	CG5644	uncharacterized protein
280	chr3L	7787979	7787989	11	1-TGACCTTGAVH-1-chr3L	38.7	+	3.48382	Intron (FBtr0304992/FBgn0052369, intron 2 of 6)	7763970	7775603	11634	2	FBgn0023076	FBtr0100134	-12376	Clk	Clock
281	chr2R	23794166	23794176	11	1-TGACCTTGAVH-1-chr2R	47	+	3.27084	Promoter (2-3kb)	23790614	23791227	614	2	FBgn0034904	FBtr0072245	-2939	CG15800	uncharacterized protein
282	chr2R	18605926	18605936	11	1-TGACCTTGAVH-3-chr2R	40.1	-	2.95575	Intron (FBtr0300421/FBgn0050115, intron 1 of 7)	18554119	18611777	57659	2	FBgn0050115	FBtr0300421	5841	GEFmeso	Guanine nucleotide exchange factor in mesoderm
283	chrX	11326725	11326735	11	1-TGACCTTGAVH-2-chrX	33.2	-	2.93744	Promoter (1-2kb)	11325385	11334071	8687	1	FBgn0030286	FBtr0073448	1340	Gapvd1	GTPase activating protein and VPS9 domains 1
284	chr2L	20084034	20084044	11	1-TGACCTTGAVH-2-chr2L	33.2	+	2.69354	Promoter (1-2kb)	20079270	20085070	5801	2	FBgn0263773	FBtr0310560	1026	fok	fledgling of Klp38B
285	chr2L	10514083	10514093	11	1-TGACCTTGAVH-1-chr2L	34.4	-	2.10425	Promoter (2-3kb)	10511253	10516668	5416	2	FBgn0267828	FBtr0347403	2575	Fatp1	Fatty acid transport protein 1
286	chrX	14762806	14762816	11	1-TGACCTTGAVH-2-chrX	34.4	+	2.06059	Promoter (2-3kb)	14757531	14765787	8257	2	FBgn0030576	FBtr0073939	2971	CG15890	uncharacterized protein
287	chr2L	9228288	9228298	11	1-TGACCTTGAVH-1-chr2L	43.8	-	1.62266	Intron (FBtr0303871/FBgn0041092, intron 2 of 13)	9236521	9236594	74	2	FBgn0051885	FBtr0079820	8296	NA	NA
288	chrX	17486621	17486631	11	1-TGACCTTGAVH-1-chrX	35.8	+	1.02783	Promoter (2-3kb)	17456557	17489315	32759	2	FBgn0263706	FBtr0310336	2684	CG43658	uncharacterized protein
289	chr3R	14807008	14807018	11	1-TGACCTTGAVH-1-chr3R	40.7	-	0.901685	3' UTR	14806543	14811610	5068	2	FBgn0266756	FBtr0334288	4592	btsz	bitesize
290	chr3R	19908970	19908980	11	1-TGACCTTGAVH-1-chr3R	36.5	-	-0.952283	Promoter (1-2kb)	19907681	19908091	411	1	FBgn0266407	FBtr0344355	1289	NA	NA
291	chr2R	10515920	10515930	11	1-TGACCTTGAVH-1-chr2R	37.5	+	-1.64842	Exon (FBtr0089348/FBgn0283521, exon 6 of 7)	10504859	10534354	29496	2	FBgn0283521	FBtr0089343	18424	lola	longitudinals lacking
292	chr3R	7994696	7994706	11	1-TGACCTTGAVH-1-chr3R	37.3	+	-2.29845	Promoter (1-2kb)	7981817	7995852	14036	2	FBgn0037534	FBtr0081823	1146	ELOVL	ELOVL fatty acid elongase
293	chr3R	15086995	15087005	11	1-TGACCTTGAVH-1-chr3R	33.8	+	-2.41872	Intron (FBtr0344380/FBgn0038286, intron 1 of 4)	15078530	15079285	756	2	FBgn0038285	FBtr0083042	-7710	CG6974	uncharacterized protein
294	chr3L	17036130	17036140	11	1-TGACCTTGAVH-1-chr3L	45.2	-	-2.5541	Promoter (<=1kb)	17035668	17036865	1198	1	FBgn0036691	FBtr0075278	462	beg	bad egg
295	chr3R	4449342	4449352	11	1-TGACCTTGAVH-1-chr3R	37.4	-	-2.89699	Promoter (1-2kb)	4441415	4450843	9429	2	FBgn0051522	FBtr0078941	1491	CG31522	uncharacterized protein
296	chr2L	14248103	14248113	11	1-TGACCTTGAVH-1-chr2L	40.7	+	-3.17967	Distal Intergenic	14241144	14241732	589	1	FBgn0265147	FBtr0336992	6959	NA	NA
297	chr3R	13062306	13062316	11	1-TGACCTTGAVH-3-chr3R	35.1	-	-3.91695	Promoter (<=1kb)	13062522	13078124	15603	1	FBgn0004666	FBtr0334613	-206	sim	single-minded
298	chr2R	10534026	10534036	11	1-TGACCTTGAVH-1-chr2R	51.9	-	-4.08533	Promoter (<=1kb)	10504859	10534354	29496	2	FBgn0283521	FBtr0089343	318	lola	longitudinals lacking
299	chr3R	10088516	10088526	11	1-TGACCTTGAVH-1-chr3R	37.8	+	-4.10703	Promoter (2-3kb)	10091126	10091217	92	1	FBgn0262378	FBtr0304217	-2600	NA	NA
300	chr3L	2420513	2420523	11	1-TGACCTTGAVH-1-chr3L	38.3	+	-4.79426	Promoter (2-3kb)	2417955	2466353	48399	1	FBgn0266696	FBtr0345101	2558	Svil	Supervillin
301	chr2R	16020597	16020607	11	1-TGACCTTGAVH-1-chr2R	47.3	-	-4.82811	Promoter (2-3kb)	16017737	16024627	6891	1	FBgn0034067	FBtr0340018	2860	CG8399	uncharacterized protein
302	chrX	2303109	2303119	11	1-TGACCTTGAVH-1-chrX	44.9	+	-5.03767	Intron (FBtr0344007/FBgn0003079, intron 2 of 6)	2295466	2343870	48405	1	FBgn0003079	FBtr0344007	7643	Raf	Raf oncogene
303	chr3R	21658648	21658658	11	1-TGACCTTGAVH-1-chr3R	39.1	-	-5.52301	Promoter (1-2kb)	21621368	21660432	39065	2	FBgn0011766	FBtr0084117	1774	E2f1	E2F transcription factor 1
304	chr3R	17701985	17701995	11	1-TGACCTTGAVH-1-chr3R	34.1	+	-5.82927	Promoter (1-2kb)	17700741	17701873	1133	1	FBgn0267703	FBtr0347243	1244	NA	NA
305	chrX	17300020	17300030	11	1-TGACCTTGAVH-2-chrX	39.7	+	-5.89272	Promoter (<=1kb)	17285704	17300621	14918	2	FBgn0024238	FBtr0074442	591	Fim	Fimbrin
306	chr3L	15539954	15539964	11	1-TGACCTTGAVH-3-chr3L	34.2	+	-6.00346	Intron (FBtr0075557/FBgn0004396, intron 1 of 5)	15535395	15553214	17820	1	FBgn0004396	FBtr0075558	4559	CrebA	Cyclic-AMP response element binding protein A
307	chr2R	18605812	18605822	11	1-TGACCTTGAVH-2-chr2R	40.3	-	-6.01342	Intron (FBtr0300421/FBgn0050115, intron 1 of 7)	18554119	18611777	57659	2	FBgn0050115	FBtr0300421	5955	GEFmeso	Guanine nucleotide exchange factor in mesoderm
308	chr3R	23215691	23215701	11	1-TGACCTTGAVH-1-chr3R	40	+	-6.03749	Promoter (1-2kb)	23185580	23214557	28978	2	FBgn0262975	FBtr0306755	-1134	cnc	cap-n-collar
309	chr2R	13584377	13584387	11	1-TGACCTTGAVH-1-chr2R	38.8	-	-6.15929	Intron (FBtr0330617/FBgn0027581, intron 2 of 8)	13578036	13579626	1591	1	FBgn0265497	FBtr0339944	6341	NA	NA
310	chr2L	20084047	20084057	11	1-TGACCTTGAVH-1-chr2L	36.8	+	-6.1889	Promoter (1-2kb)	20079270	20085070	5801	2	FBgn0263773	FBtr0310560	1013	fok	fledgling of Klp38B
311	chr3R	18381147	18381157	11	1-TGACCTTGAVH-1-chr3R	40.6	+	-6.20905	Promoter (<=1kb)	18378124	18381178	3055	2	FBgn0038610	FBtr0083581	21	CG7675	uncharacterized protein
312	chr3L	19858105	19858115	11	1-TGACCTTGAVH-1-chr3L	36.9	-	-6.29059	Intron (FBtr0074885/FBgn0020389, intron 2 of 4)	19861458	19861869	412	1	FBgn0266982	FBtr0345884	-3343	NA	NA
313	chr2L	15909812	15909822	11	1-TGACCTTGAVH-1-chr2L	48	+	-6.34799	Promoter (1-2kb)	15911691	15912062	372	1	FBgn0266161	FBtr0343723	-1869	NA	NA
314	chr3L	13950964	13950974	11	1-TGACCTTGAVH-1-chr3L	34.5	+	-6.35979	Intron (FBtr0075757/FBgn0052137, intron 2 of 6)	13939250	13962647	23398	1	FBgn0052137	FBtr0075758	11714	CG32137	uncharacterized protein
315	chr3L	17604118	17604128	11	1-TGACCTTGAVH-1-chr3L	36.5	+	-6.40565	Intron (FBtr0075202/FBgn0000567, intron 1 of 7)	17560158	17619325	59168	2	FBgn0000567	FBtr0075202	15197	Eip74EF	Ecdysone-induced protein 74EF
316	chr3L	19907041	19907051	11	1-TGACCTTGAVH-1-chr3L	39.1	-	-6.46528	Promoter (2-3kb)	19909365	19910203	839	1	FBgn0264481	FBtr0332770	-2314	NA	NA
317	chr3L	15698759	15698769	11	1-TGACCTTGAVH-1-chr3L	35.8	-	-6.60336	Promoter (1-2kb)	15697594	15699850	2257	2	FBgn0041160	FBtr0075580	1081	comm2	comm2
318	chr3R	4729979	4729989	11	1-TGACCTTGAVH-1-chr3R	33.2	-	-6.70582	Promoter (1-2kb)	4719458	4731878	12421	2	FBgn0027570	FBtr0333922	1889	Nep2	Neprilysin 2
319	chr3L	12098703	12098713	11	1-TGACCTTGAVH-1-chr3L	44.6	-	-6.87715	Distal Intergenic	12088626	12089225	600	1	FBgn0036246	FBtr0075990	10077	CG17154	uncharacterized protein
320	chr2L	7436908	7436918	11	1-TGACCTTGAVH-1-chr2L	38.6	+	-7.07993	Promoter (<=1kb)	7437492	7445269	7778	1	FBgn0031914	FBtr0079446	-574	CG5973	uncharacterized protein
321	chrX	7709406	7709416	11	1-TGACCTTGAVH-1-chrX	34.1	-	-7.08636	Promoter (<=1kb)	7682338	7709385	27048	2	FBgn0029504	FBtr0310287	-21	CHES-1-like	Checkpoint suppressor 1-like
322	chr2R	16662042	16662052	11	1-TGACCTTGAVH-1-chr2R	35.7	-	-7.2506	Promoter (1-2kb)	16655323	16663960	8638	2	FBgn0024315	FBtr0340067	1908	Picot	picot
323	chr2L	14666910	14666920	11	1-TGACCTTGAVH-1-chr2L	36.4	-	-7.76718	Intron (FBtr0301496/FBgn0003016, intron 1 of 11)	14599196	14689340	90145	2	FBgn0003016	FBtr0301496	22420	osp	outspread
324	chr2R	10534032	10534042	11	1-TGACCTTGAVH-2-chr2R	38.9	-	-8.03065	Promoter (<=1kb)	10504859	10534354	29496	2	FBgn0283521	FBtr0089343	312	lola	longitudinals lacking
325	chr3R	15293189	15293199	11	1-TGACCTTGAVH-1-chr3R	34.6	-	-8.17864	Promoter (2-3kb)	15290946	15308779	17834	1	FBgn0003721	FBtr0333917	2243	Tm1	Tropomyosin 1
326	chr3R	24576191	24576201	11	1-TGACCTTGAVH-2-chr3R	37	-	-8.40652	Promoter (1-2kb)	24559280	24577453	18174	2	FBgn0039209	FBtr0084674	1252	REPTOR	Repressed by TOR
327	chrX	13148348	13148358	11	1-TGACCTTGAVH-2-chrX	34.2	+	-8.41376	Intron (FBtr0073725/FBgn0052645, intron 1 of 5)	13153461	13154924	1464	2	FBgn0030455	FBtr0301690	6566	CG4318	uncharacterized protein
328	chrX	14949009	14949019	11	1-TGACCTTGAVH-1-chrX	46	-	-8.57617	Promoter (1-2kb)	14934040	14950749	16710	2	FBgn0027601	FBtr0073972	1730	pdgy	pudgy
329	chr2L	9506824	9506834	11	1-TGACCTTGAVH-2-chr2L	35.3	+	-8.59954	Intron (FBtr0089853/FBgn0032120, intron 2 of 14)	9495474	9520696	25223	1	FBgn0032120	FBtr0301065	11350	CG33298	uncharacterized protein
330	chr3R	28683737	28683747	11	1-TGACCTTGAVH-2-chr3R	33.9	+	-8.9535	Promoter (1-2kb)	28682341	28695939	13599	1	FBgn0039594	FBtr0305088	1396	snu	snustorr
331	chr3R	28691837	28691847	11	1-TGACCTTGAVH-2-chr3R	37.1	+	-8.99062	Promoter (2-3kb)	28689671	28695939	6269	1	FBgn0039594	FBtr0305087	2166	snu	snustorr
332	chrX	2650635	2650645	11	1-TGACCTTGAVH-1-chrX	34.6	+	-9.16338	Intron (FBtr0070466/FBgn0003371, intron 2 of 9)	2646637	2677846	31210	1	FBgn0003371	FBtr0331752	3998	sgg	shaggy
333	chr3R	9424500	9424510	11	1-TGACCTTGAVH-1-chr3R	38.4	+	-9.18074	Intron (FBtr0111027/FBgn0261552, intron 2 of 7)	9428561	9448649	20089	1	FBgn0261552	FBtr0111028	-4051	ps	pasilla
334	chr3L	18057160	18057170	11	1-TGACCTTGAVH-2-chr3L	35	-	-9.89005	Promoter (2-3kb)	17953358	18059598	106241	2	FBgn0000568	FBtr0075148	2428	Eip75B	Ecdysone-induced protein 75B
335	chr3R	9430805	9430815	11	1-TGACCTTGAVH-1-chr3R	56.8	-	-10.3813	Promoter (1-2kb)	9432602	9448649	16048	1	FBgn0261552	FBtr0334304	-1787	ps	pasilla
336	chrX	1205533	1205543	11	1-TGACCTTGAVH-1-chrX	39.5	+	-10.836	Promoter (1-2kb)	1206737	1207555	819	1	FBgn0040357	FBtr0070204	-1194	CG14624	uncharacterized protein
337	chrX	13148484	13148494	11	1-TGACCTTGAVH-1-chrX	36.8	+	-11.1332	Intron (FBtr0073725/FBgn0052645, intron 1 of 5)	13153461	13154924	1464	2	FBgn0030455	FBtr0301690	6430	CG4318	uncharacterized protein
338	chr3R	10093502	10093512	11	1-TGACCTTGAVH-1-chr3R	44.7	+	-11.6496	Promoter (<=1kb)	10093761	10094625	865	1	FBgn0263413	FBtr0309196	-249	NA	NA
339	chr2R	14344013	14344023	11	1-TGACCTTGAVH-2-chr2R	33.6	+	-11.9352	Promoter (1-2kb)	14342062	14351802	9741	1	FBgn0085408	FBtr0112616	1951	Shrm	Shroom
340	chr2R	20274470	20274480	11	1-TGACCTTGAVH-1-chr2R	33.2	-	-12.1776	Promoter (<=1kb)	20271653	20274499	2847	2	FBgn0034494	FBtr0086305	19	CG10444	uncharacterized protein
341	chrX	11516512	11516522	11	1-TGACCTTGAVH-1-chrX	46.2	+	-12.6851	Intron (FBtr0301020/FBgn0052666, intron 2 of 5)	11493819	11555045	61227	1	FBgn0052666	FBtr0340295	22693	Drak	Death-associated protein kinase related
342	chrX	21368431	21368441	11	1-TGACCTTGAVH-2-chrX	42.8	-	-13.3573	Promoter (<=1kb)	21368614	21373145	4532	1	FBgn0024251	FBtr0331745	-173	bbx	bobby sox
343	chr3R	9430688	9430698	11	1-TGACCTTGAVH-2-chr3R	37.7	+	-15.6804	Promoter (1-2kb)	9432602	9448649	16048	1	FBgn0261552	FBtr0334304	-1904	ps	pasilla
344	chr3L	8675007	8675017	11	1-TGACCTTGAVH-1-chr3L	47.4	+	-15.7278	Promoter (<=1kb)	8675759	8679253	3495	1	FBgn0001168	FBtr0100153	-742	h	hairy
345	chr2L	19869721	19869731	11	1-TGACCTTGAVH-1-chr2L	54	-	-15.8257	Intron (FBtr0329838/FBgn0263873, intron 3 of 15)	19866181	19958424	92244	1	FBgn0263873	FBtr0336736	3540	sick	sickie
346	chr2R	16020625	16020635	11	1-TGACCTTGAVH-2-chr2R	37.5	-	-15.9202	Promoter (2-3kb)	16017737	16024627	6891	1	FBgn0034067	FBtr0340018	2888	CG8399	uncharacterized protein
347	chr2L	1098604	1098614	11	1-TGACCTTGAVH-1-chr2L	57.6	+	-15.924	Intron (FBtr0332570/FBgn0031299, intron 2 of 8)	1083091	1102504	19414	2	FBgn0031299	FBtr0332570	3890	NA	NA
348	chr2R	8671484	8671494	11	1-TGACCTTGAVH-1-chr2R	46.3	-	-16.3011	Promoter (<=1kb)	8672056	8682791	10736	1	FBgn0263120	FBtr0100429	-562	Acsl	Acyl-CoA synthetase long-chain
349	chr2R	22902892	22902902	11	1-TGACCTTGAVH-1-chr2R	41.2	-	-17.1063	Intron (FBtr0071942/FBgn0034797, intron 1 of 10)	22896174	22916719	20546	1	FBgn0034797	FBtr0304795	6718	nahoda	nahoda
350	chr2L	2364450	2364460	11	1-TGACCTTGAVH-1-chr2L	36	-	-17.2138	Promoter (<=1kb)	2359142	2364721	5580	2	FBgn0014010	FBtr0077796	261	Rab5	Rab5
351	chr2R	24979844	24979854	11	1-TGACCTTGAVH-1-chr2R	42.4	+	-17.2305	Promoter (1-2kb)	24976605	24981158	4554	2	FBgn0010435	FBtr0343507	1304	emp	epithelial membrane protein
352	chr3R	24565688	24565698	11	1-TGACCTTGAVH-1-chr3R	49.8	-	-18.0375	Intron (FBtr0084672/FBgn0039209, intron 2 of 4)	24559789	24571965	12177	2	FBgn0039209	FBtr0345204	6267	REPTOR	Repressed by TOR
353	chr3R	13062314	13062324	11	1-TGACCTTGAVH-1-chr3R	41	+	-18.5327	Promoter (<=1kb)	13062522	13078124	15603	1	FBgn0004666	FBtr0334613	-198	sim	single-minded
354	chr2L	9503110	9503120	11	1-TGACCTTGAVH-1-chr2L	40	-	-18.8494	Intron (FBtr0089853/FBgn0032120, intron 1 of 14)	9495474	9520696	25223	1	FBgn0032120	FBtr0301065	7636	CG33298	uncharacterized protein
355	chr3R	24090255	24090265	11	1-TGACCTTGAVH-2-chr3R	43.5	-	-19.2869	Intron (FBtr0084587/FBgn0053100, intron 2 of 3)	24101600	24105763	4164	2	FBgn0013343	FBtr0303161	15498	Syx1A	Syntaxin 1A
356	chr3R	9424418	9424428	11	1-TGACCTTGAVH-2-chr3R	35.3	+	-20.7227	Intron (FBtr0111027/FBgn0261552, intron 2 of 7)	9428561	9448649	20089	1	FBgn0261552	FBtr0111028	-4133	ps	pasilla
357	chr3R	21658419	21658429	11	1-TGACCTTGAVH-2-chr3R	36.4	-	-20.8256	Promoter (2-3kb)	21621368	21660432	39065	2	FBgn0011766	FBtr0084117	2003	E2f1	E2F transcription factor 1
358	chr3L	18818607	18818617	11	1-TGACCTTGAVH-1-chr3L	38.1	-	-21.1726	Promoter (2-3kb)	18802265	18820675	18411	2	FBgn0036814	FBtr0075084	2058	CG14073	uncharacterized protein
359	chr3R	23792550	23792560	11	1-TGACCTTGAVH-2-chr3R	35.7	-	-21.4133	Exon (FBtr0084459/FBgn0015513, exon 4 of 14)	23781765	23801634	19870	1	FBgn0015513	FBtr0304729	10785	mbc	myoblast city
360	chr2R	7911551	7911561	11	1-TGACCTTGAVH-2-chr2R	41.2	-	-23.5836	Intron (FBtr0088844/FBgn0050377, intron 4 of 4)	7915027	7916478	1452	2	FBgn0033232	FBtr0088889	4917	CG12159	uncharacterized protein
361	chr2L	5090272	5090282	11	1-TGACCTTGAVH-1-chr2L	41.1	-	-24.349	Intron (FBtr0079026/FBgn0031681, intron 2 of 9)	5072170	5093592	21423	2	FBgn0031681	FBtr0079026	3310	Pgant5	Polypeptide N-Acetylgalactosaminyltransferase 5
362	chrX	5897833	5897843	11	1-TGACCTTGAVH-1-chrX	61.5	+	-24.4998	Promoter (2-3kb)	5882480	5899989	17510	2	FBgn0267228	FBtr0346401	2146	NA	NA
363	chr3R	13062293	13062303	11	1-TGACCTTGAVH-2-chr3R	35.3	+	-24.5032	Promoter (<=1kb)	13062522	13078124	15603	1	FBgn0004666	FBtr0334613	-219	sim	single-minded
364	chr2L	9508402	9508412	11	1-TGACCTTGAVH-1-chr2L	48.1	+	-25.3417	Intron (FBtr0089853/FBgn0032120, intron 2 of 14)	9521210	9540045	18836	1	FBgn0032123	FBtr0079827	-12798	Oatp30B	Organic anion transporting polypeptide 30B
365	chr2L	6088445	6088455	11	1-TGACCTTGAVH-1-chr2L	38.6	+	-25.6813	Promoter (2-3kb)	6091412	6096498	5087	1	FBgn0266445	FBtr0344439	-2957	CG45075	uncharacterized protein
366	chrX	10718813	10718823	11	1-TGACCTTGAVH-1-chrX	35	-	-26.0255	Intron (FBtr0333017/FBgn0052676, intron 2 of 3)	10744502	10748806	4305	1	FBgn0003204	FBtr0071495	-25679	ras	raspberry
367	chr3L	20398317	20398327	11	1-TGACCTTGAVH-1-chr3L	40.1	+	-26.359	Promoter (2-3kb)	20395394	20395851	458	2	FBgn0267237	FBtr0346407	-2466	NA	NA
368	chrX	17300177	17300187	11	1-TGACCTTGAVH-1-chrX	40.8	+	-27.2086	Promoter (<=1kb)	17285704	17300621	14918	2	FBgn0024238	FBtr0074442	434	Fim	Fimbrin
369	chr3L	7530730	7530740	11	1-TGACCTTGAVH-2-chr3L	36.8	-	-28.1389	Promoter (1-2kb)	7532429	7538279	5851	1	FBgn0028582	FBtr0076795	-1689	lqf	liquid facets
370	chr3R	13977868	13977878	11	1-TGACCTTGAVH-1-chr3R	38.7	-	-28.3224	Intron (FBtr0100361/FBgn0264493, intron 1 of 7)	13967955	13983363	15409	2	FBgn0264493	FBtr0100361	5485	rdx	roadkill
371	chr3L	17924512	17924522	11	1-TGACCTTGAVH-2-chr3L	33.3	+	-28.4134	Distal Intergenic	17934032	17935572	1541	1	FBgn0267794	FBtr0347291	-9510	NA	NA
372	chr3L	17378647	17378657	11	1-TGACCTTGAVH-1-chr3L	36.7	-	-29.2594	Promoter (<=1kb)	17367753	17379530	11778	2	FBgn0036715	FBtr0075239	873	Cad74A	Cadherin 74A
373	chr3L	15539875	15539885	11	1-TGACCTTGAVH-1-chr3L	40.6	+	-30.7595	Intron (FBtr0075557/FBgn0004396, intron 1 of 5)	15535395	15553214	17820	1	FBgn0004396	FBtr0075558	4480	CrebA	Cyclic-AMP response element binding protein A
374	chr2L	9507012	9507022	11	1-TGACCTTGAVH-1-chr2L	37.7	-	-31.2041	Intron (FBtr0089853/FBgn0032120, intron 2 of 14)	9495474	9520696	25223	1	FBgn0032120	FBtr0301065	11538	CG33298	uncharacterized protein
375	chr3R	21658140	21658150	11	1-TGACCTTGAVH-2-chr3R	34.1	-	-32.7185	Promoter (2-3kb)	21621368	21660432	39065	2	FBgn0011766	FBtr0084117	2282	E2f1	E2F transcription factor 1
376	chr2L	9503021	9503031	11	1-TGACCTTGAVH-2-chr2L	34.5	+	-33.6722	Intron (FBtr0089853/FBgn0032120, intron 1 of 14)	9495474	9520696	25223	1	FBgn0032120	FBtr0301065	7547	CG33298	uncharacterized protein
377	chr2R	13584371	13584381	11	1-TGACCTTGAVH-3-chr2R	34.4	-	-35.1187	Intron (FBtr0330617/FBgn0027581, intron 2 of 8)	13578036	13579626	1591	1	FBgn0265497	FBtr0339944	6335	NA	NA
378	chr3L	7347283	7347293	11	1-TGACCTTGAVH-2-chr3L	36.8	+	-39.693	Promoter (<=1kb)	7345698	7347123	1426	2	FBgn0035768	FBtr0076880	-160	CG14834	uncharacterized protein
379	chr3L	6264076	6264086	11	1-TGACCTTGAVH-2-chr3L	44	-	-41.8838	Promoter (<=1kb)	6263008	6263399	392	2	FBgn0265715	FBtr0340648	-677	NA	NA
380	chr3L	9064666	9064676	11	1-TGACCTTGAVH-1-chr3L	40.7	+	-42.0611	Promoter (1-2kb)	9048880	9066027	17148	2	FBgn0000116	FBtr0076543	1351	Argk	Arginine kinase
381	chrX	7873760	7873770	11	1-TGACCTTGAVH-2-chrX	34.9	+	-50.8477	Promoter (<=1kb)	7867199	7873222	6024	2	FBgn0000427	FBtr0309796	-538	2020-12-01	defective chorion 1
382	chr3L	8731006	8731016	11	1-TGACCTTGAVH-2-chr3L	34.1	-	-54.1833	Promoter (<=1kb)	8731944	8732599	656	1	FBgn0000356	FBtr0076574	-928	Cp16	Chorion protein 16
383	chr2L	7436762	7436772	11	1-TGACCTTGAVH-2-chr2L	35.3	+	-57.2425	Promoter (<=1kb)	7437492	7445269	7778	1	FBgn0031914	FBtr0079446	-720	CG5973	uncharacterized protein
384	chr3R	18385293	18385303	11	1-TGACCTTGAVH-1-chr3R	34.3	-	-58.5578	Promoter (<=1kb)	18381580	18385072	3493	2	FBgn0038611	FBtr0083580	-221	CG14309	uncharacterized protein
385	chr3L	6264230	6264240	11	1-TGACCTTGAVH-3-chr3L	36.4	+	-59.1431	Promoter (<=1kb)	6263008	6263399	392	2	FBgn0265715	FBtr0340648	-831	NA	NA
386	chr3L	7347260	7347270	11	1-TGACCTTGAVH-1-chr3L	45.4	-	-59.8202	Promoter (<=1kb)	7345698	7347123	1426	2	FBgn0035768	FBtr0076880	-137	CG14834	uncharacterized protein
387	chr3L	20398200	20398210	11	1-TGACCTTGAVH-2-chr3L	34.1	+	-60.2219	Promoter (2-3kb)	20395394	20395851	458	2	FBgn0267237	FBtr0346407	-2349	NA	NA
388	chr3R	16201595	16201605	11	1-TGACCTTGAVH-2-chr3R	36.8	+	-61.1798	Promoter (1-2kb)	16198000	16203083	5084	2	FBgn0038407	FBtr0083278	1478	CG6126	uncharacterized protein
389	chrX	5897823	5897833	11	1-TGACCTTGAVH-2-chrX	33.1	+	-74.6575	Promoter (2-3kb)	5882480	5899989	17510	2	FBgn0267228	FBtr0346401	2156	NA	NA
390	chr3L	8731029	8731039	11	1-TGACCTTGAVH-1-chr3L	35.3	+	-78.7148	Promoter (<=1kb)	8731944	8732599	656	1	FBgn0000356	FBtr0076574	-905	Cp16	Chorion protein 16
