# Supplementary material for: Nuclear receptor Ftz-f1 promotes follicle maturation and ovulation partly via bHLH/PAS transcription factor Sim
Source: eLife. 2020 Apr 27;9:e54568. doi: 10.7554/eLife.54568 (PMC7239656; doi:10.7554/eLife.54568)
Supplement: Supplementary file 3. [file elife-54568-supp3.xlsx]

## Sheet: summary direct target
Gene Category	Gene ID	GeneSymbol	Transcript ID	DistanceToTSS	motif annotation	Replicate 1		Repplicate 2		Replicate 3
						PeakEnrichment	log-odds score	PeakEnrichment	log-odds score	PeakEnrichment	log-odds score
downregulated genes	FBgn0000567	Eip74EF	FBtr0075202	-14107	Intron (FBtr0075202/FBgn0000567, intron 5 of 7)			19.9908	51.4926	7.60546	17.3435
				3884	Intron (FBtr0075202/FBgn0000567, intron 1 of 7)			13.7469	40.1145	7.29981	5.92465
				5012	Intron (FBtr0075202/FBgn0000567, intron 1 of 7)	4.13029	13.0958	12.8184	29.9525	7.26151	33.6299
				5282	Intron (FBtr0075202/FBgn0000567, intron 1 of 7)			7.27233	23.6795	4.05986	17.6664
				14329	Intron (FBtr0075202/FBgn0000567, intron 1 of 7)			7.53863	8.79669	6.65162	18.7522
	FBgn0010435	emp	FBtr0343507	343	Promoter (<=1kb)	4.25916	21.4992	6.53448	29.6839
	FBgn0004666	sim	FBtr0334613	-206	Promoter (<=1kb)	6.46133	19.8267	17.7362	24.9233
	FBgn0033205	CG2064	FBtr0088923	-86	Promoter (<=1kb)			8.16149	19.6103	4.10596	17.8532
	FBgn0050015	CG30015	FBtr0088242	5792	Intron (FBtr0088242/FBgn0050015, intron 1 of 7)			9.0752	16.3934	6.89219	18.7064
	FBgn0031717	Oscillin	FBtr0307060	-29	Promoter (<=1kb)			15.9431	88.9949	7.60094	62.9295
	FBgn0041709	yellow-g	FBtr0072902	-77	Promoter (<=1kb)			8.86573	15.8916	7.85673	60.423
	FBgn0031734	CG11147	FBtr0079165	-1364	Promoter (1-2kb)			7.14707	52.481	4.34391	21.906
				-1329	Promoter (1-2kb)			7.14707	29.1307	4.34391	23.0318
	FBgn0036612	CG4998	FBtr0075377	-982	Promoter (<=1kb)			4.42873	12.6727	4.14662	10.0572
	FBgn0036715	Cad74A	FBtr0075239	845	Promoter (<=1kb)			6.02726	26.9933	6.28205	24.4486
	FBgn0039594	snu	FBtr0305087	2123	Promoter (1-2kb)			10.1791	21.0809	4.86163	24.8894
	FBgn0025390	Mur2B	FBtr0070284	-1780	Promoter (1-2kb)			7.74482	34.4067	4.77657	21.2515
				-1200	Promoter (1-2kb)			5.66831	20.8532	6.25258	14.8324
	FBgn0000360	Cp38	FBtr0300448	818	Promoter (<=1kb)			4.32052	36.4332	4.77557	31.6632
upregulated genes	FBgn0030438	CG15721	FBtr0305600	-246	Promoter (<=1kb)			15.8713	51.3564	8.93597	47.8524
	FBgn0050035	Tret1-1	FBtr0088073	-188	Promoter (<=1kb)	3.78263	20.8191	8.86979	30.6726
